# Supplementary material for: Photoredox mediated nickel catalyzed C(sp3)–H thiocarbonylation of ethers
Source: PubMed Central journal article supplement — Chem Sci. 2017 Jul 24;8(9):6613–8. doi: 10.1039/c7sc02516e (PMC5627187; doi:10.1039/c7sc02516e), 2017-07-24

## Supporting Information

# Photoredox Mediated Nickel Catalyzed C(sp<sup>3</sup>)-H Thiocarbonylation of Ethers

Byungjoon Kang and Soon Hyeok Hong\*

Department of Chemistry, College of Natural Science, Seoul National University, 1 Gwanak-ro,  
Seoul 08826, South Korea.

## Table of Contents

### I. Experimental section

1. General information (S3)
2. General reaction procedures (S4)
3. Reaction condition optimization (S5)
4. <sup>13</sup>C incorporation experiment (S7)
5. Deuterium incorporation experiment (S9)
6. Cyclic voltammetry (CV) studies (S10)
7. DFT calculation results about bond dissociation energy (BDE) of thioesters (S14)
8. Synthesis and characterization of nickel complexes (S15)
9. Characterization of products (S18)

### II. References (S31)

### III. <sup>1</sup>H and <sup>13</sup>C NMR spectra (S32)

## **Complete list of authors of Gaussian 09**

Gaussian 09, revision B.01; Frisch, M. J.; Trucks, G. W.; Schlegel, H. B.; Scuseria, G. E.; Robb, M. A.; Cheeseman, J. R.; Montgomery, J. A., Jr.; Vreven, T.; Kudin, K.; Burant, J. C.; Millam, J. M.; Iyengar, S. S.; Tomasi, J.; Barone, V.; Mennucci, B.; Cossi, M.; Scalmani, G.; Rega, N.; Petersson, G.A.; Nakatsuji, H.; Hada, M.; Ehara, M.; Toyota, K.; Fukuda, R.; Hasegawa, J.; Ishida, M.; Nakajima, T.; Honda, Y.; Kitao, O.; Nakai, H.; Klene, M.; Li, X.; Knox, J. E.; Hratchian, H. P.; Cross, J. B.; Adamo, C.; Jaramillo, J.; Comperts, R.; Startmann, R. E.; Yazyev, O.; Austin, A. J.; Cammi, R.; Pomelli, C.; Ochterski, J. W.; Ayala, P. Y.; Morokuma, K.; Voth, G. A.; Salvador, P.; Dannenbuerg, J. J.; Zakrzewski, V. G.; Dapprich, S.; Daniels, A. D.; Strain, M. C.; Farkas, O.; Malick, D. K.; Rabuck, A. D.; Raghavachari, K.; Foresman, J. B.; Ortiz, J. V.; Cui, Q.; Baboul, A. G.; Clifford, S.; Cioslowski, J.; Stefanov, B. B.; Liu, G.; Liashenko, A.; Piskorz, P.; Komaromi, I.; Martin, R. L.; Fox, D. J.; Keith, T.; Al-Laham, M. A.; Peng, C. Y.; Nanayakkara, A.; Challacombe, M.; Gill, P. M. W.; Johnson, B.; Chen, W.; Wong, M. W., Gonzalez, C.; Pople, J. A.; Gaussian, Inc.: Wallingford CT, 2010.

## I. Experimental section

### 1. General information

Unless otherwise noted, all reactions were carried out using standard Schlenk techniques or in an argon-filled glove box. NMR spectra were recorded in  $\text{CDCl}_3$  or  $\text{CD}_2\text{Cl}_2$  on a Bruker DPX-300 (300 MHz) spectrometer or Varian 500-MR. Chemical shifts are reported in ppm and coupling constant are given in Hz. High-resolution mass spectrometry (HRMS) analysis was performed at the Organic Chemistry Research Center in Sogang University and Korea Basic Science Institute Daegu Center using either the ESI or EI method. GC analyses were carried out with a 7980A GC system from Agilent Technologies, equipped with an HP-5 column and a Beta DEX<sup>TM</sup> 120 column using He as the mobile phase with FID detector. Single crystal X-ray crystallography was conducted at the Agilent Core Center in Research Institute of Pharmaceutical Science, Seoul National University. 34 W Blue LED lamp purchased from Kessil (Kessil H150 Grow light-Blue) was used for all the visible light photocatalytic reactions.

Unless otherwise noted, all commercially available chemicals were purchased from Sigma-Aldrich, Alfa Aesar, or Tokyo Chemical Industry (TCI), and directly used without purification. Nickel complexes were purchased from Strem Chemicals Inc. All photoredox catalysts except  $\text{Ir}[\text{dF}(\text{CF}_3)\text{ppy}]_2(\text{dtbbpy})\text{PF}_6^1$  were purchased from Sigma-Aldrich.  $\text{PhCH}_2\text{CH}_2^{13}\text{CN}$  was synthesized from 2-phenylethylbromide and  $\text{K}^{13}\text{CN}$  (99 atom %  $^{13}\text{C}$ , Cambridge Isotope Laboratories).<sup>2</sup> Ether was purified by distillation or purification column to remove the stabilizer, and directly used within 24 h to prevent side reactions. All thiols were purchased or synthesized from the corresponding aryl iodides following a reported procedure.<sup>3</sup> All thioesters were synthesized from corresponding thiols and acyl chlorides according to a modified literature procedure.<sup>4</sup>

## 2. General reaction procedures

### General procedure for reactant thioester synthesis

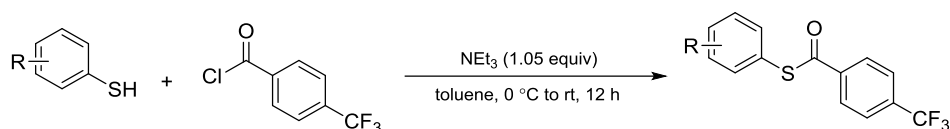

The thiol (5 mmol) and triethylamine (0.73 mL, 5.25 mmol) were dissolved in toluene (8 mL), and stirred at room temperature for 10 min. 4-(trifluoromethyl)benzoyl chloride (0.78 mL, 5.25 mmol) was added dropwise to the solution at 0 °C. The mixture was slowly warmed to the room temperature, and stirred for another 12 h. When the reaction was complete, dichloromethane (20 mL) and a 1 M HCl (aq) solution (20 mL) were added to the Schlenk tube. The organic phase was separated and the aqueous phase was washed with an additional 20 mL of dichloromethane. Evaporation of the volatile solvent gave a yellowish solid, that was further purified by silica column chromatography (hexane and ethyl acetate as eluent) to afford the desired product.

### General procedure for thiocarbonylation of ether

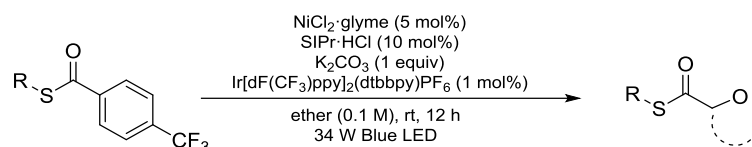

$\text{NiCl}_2\cdot\text{glyme}$  (2.7 mg, 0.0125 mmol), 1,3-bis(2,6-diisopropylphenyl)imidazolium chloride (SIPr·HCl, 10.7 mg, 0.025 mmol), and  $\text{K}_2\text{CO}_3$  (34.6 mg, 0.25 mmol) were placed in an 4 mL vial inside the glove box. 2.5 mL of ether was added to the vial, and the mixture stirred at room temperature for 10 min. The thioester (0.25 mmol) and  $\text{Ir}[\text{dF}(\text{CF}_3)\text{ppy}]_2(\text{dtbbpy})\text{PF}_6$  (2.8 mg, 0.0025 mmol) were added to the vial. The vial was taken out of the glove box and stirred at room temperature for 4–18 h under irradiation from a Kessil H150 Blue light and fan (the vial was placed at least 5 cm away from the light to minimize heating). When the reaction was complete, the mixture was diluted with dichloromethane and directly purified with silica chromatography (hexane and ethyl acetate as eluent) to afford the desired product.

### 3. Reaction condition optimization

#### Initial reaction development with various thioester structure

**Table S1.** Thioester screening results <sup>a</sup>

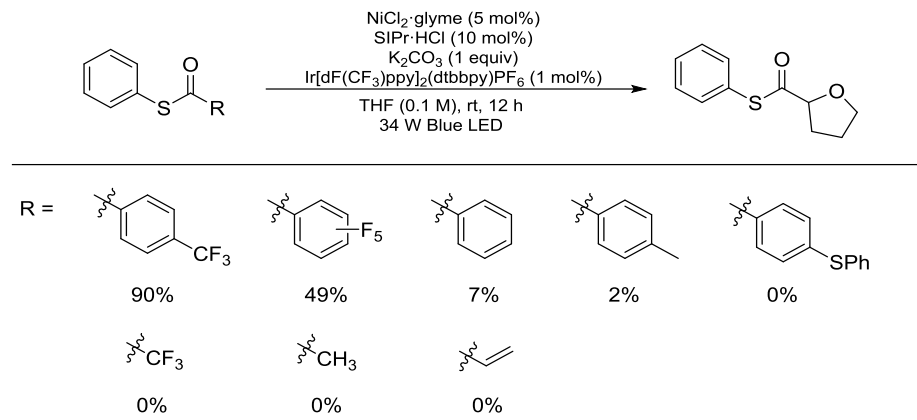

<sup>a</sup>Yield is measured by GC using dodecane as internal standard

#### Representative screening results

**Table S2.** Representative screening results

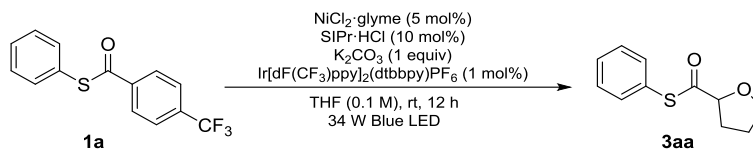

| entry | variation     | change                                             | conversion (%) <sup>a</sup> | yield (%) <sup>a</sup> |
|-------|---------------|----------------------------------------------------|-----------------------------|------------------------|
| 1     | No change     | No change                                          | 100                         | 90                     |
| 2     | Time          | 1 h                                                | 60                          | 51                     |
| 3     | Time          | 2 h                                                | 87                          | 74                     |
| 4     | Time          | 4 h                                                | 100                         | 89                     |
| 5     | Ni complex    | NiBr <sub>2</sub> ·glyme                           | 58                          | 33                     |
| 6     | Ni complex    | Ni(acac) <sub>2</sub>                              | 28                          | 28                     |
| 7     | Ni complex    | Ni(PPh <sub>3</sub> ) <sub>2</sub> Cl <sub>2</sub> | 0                           | 0                      |
| 8     | Photocatalyst | Ru(bpy) <sub>3</sub> Cl <sub>2</sub>               | 0                           | 0                      |
| 9     | Photocatalyst | Ir(ppy) <sub>3</sub>                               | 0                           | 0                      |
| 10    | Photocatalyst | Ru(1,10-phen) <sub>3</sub> Cl <sub>2</sub>         | 0                           | 0                      |
| 11    | Photocatalyst | Ir(ppy) <sub>2</sub> (dtbbpy)PF <sub>6</sub>       | 0                           | 0                      |
| 12    | Ligand        | PPh <sub>3</sub>                                   | 37                          | 0                      |
| 13    | Ligand        | dppb                                               | 88                          | 0                      |
| 14    | Ligand        | dppBz                                              | 1                           | 0                      |
| 15    | Ligand        | bipyridyl                                          | 79                          | 0                      |

|    |         |                                           |     |    |
|----|---------|-------------------------------------------|-----|----|
| 16 | Ligand  | biox                                      | 79  | 0  |
| 17 | Ligand  | dtbbpy (5 mol %)                          | 40  | 10 |
| 18 | Ligand  | IPr-diimine (10 mol %)                    | 89  | 0  |
| 19 | Ligand  | <i>i</i> Pr-HCl (10 mol %)                | 53  | 18 |
| 20 | Ligand  | IPr-HCl (10 mol %)                        | 100 | 86 |
| 21 | Ligand  | SIPr-HCl (5 mol %)                        | 97  | 85 |
| 22 | Solvent | THF (0.25 M)                              | 25  | 17 |
| 23 | Solvent | THF : DCM = 4 : 1 (0.1 M)                 | 100 | 77 |
| 24 | Base    | KHCO <sub>3</sub>                         | 75  | 8  |
| 25 | Base    | NaOAc                                     | 51  | 0  |
| 26 | Base    | Na <sub>2</sub> CO <sub>3</sub>           | 79  | 8  |
| 27 | Base    | K <sub>2</sub> HPO <sub>4</sub>           | 100 | 90 |
| 28 | Base    | K <sub>3</sub> PO <sub>4</sub>            | 66  | 36 |
| 29 | Base    | NaOMe                                     | 100 | 0  |
| 30 | Base    | KOtBu                                     | 100 | 0  |
| 31 | Base    | K <sub>2</sub> CO <sub>3</sub> (10 mol %) | 29  | 29 |

<sup>a</sup>Measured by GC using dodecane as internal standard

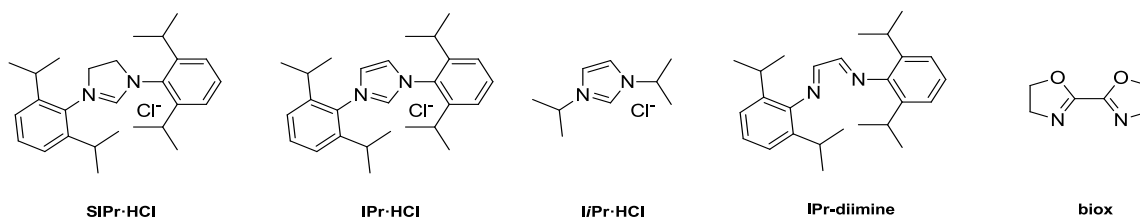

#### 4. $^{13}\text{C}$ incorporation experiment

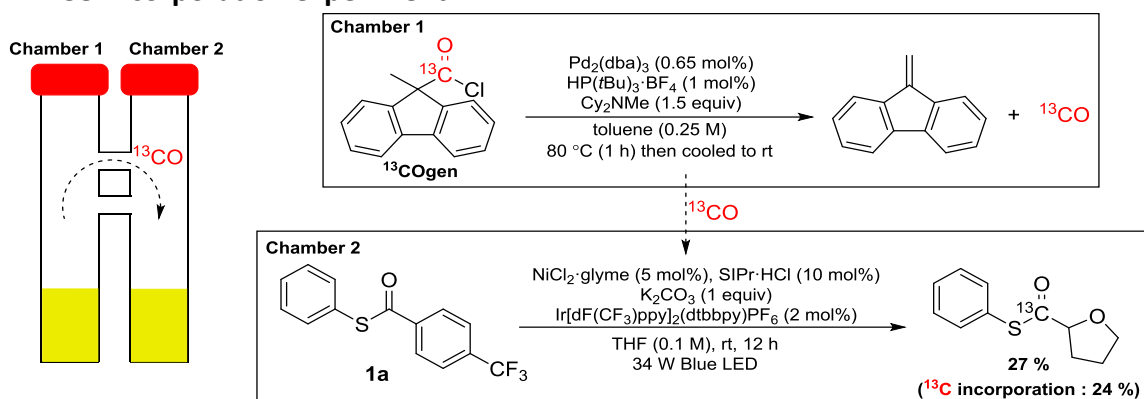

COWare (two chamber reactor) [Product No. STW1] and  $^{13}\text{COgen}$  [Product No. 745146] were purchased from Sigma-Aldrich. The COWare was equipped with two stirring bars and was placed inside the glove box. In Chamber 1,  $^{13}\text{COgen}$  (90.2 mg, 0.37 mmol),  $\text{Pd}_2(\text{dba})_3$  (2.2 mg, 0.0024 mmol),  $[(\text{tBu})_3\text{PH}]\text{BF}_4$  (1.1 mg, 0.0038 mmol),  $\text{Cy}_2\text{NMe}$  (0.12 mL, 0.56 mmol), and toluene (1.5 mL) were added. In Chamber 2,  $\text{NiCl}_2\cdot\text{glyme}$  (2.7 mg, 0.0125 mmol), 1,3-bis(2,6-diisopropylphenyl)-imidazolium chloride ( $\text{SIPr}\cdot\text{HCl}$ , 10.7 mg, 0.025 mmol),  $\text{K}_2\text{CO}_3$  (34.6 mg, 0.25 mmol), **1a** (70.6 mg, 0.25 mmol),  $\text{Ir}[\text{dF}(\text{CF}_3)\text{ppy}]_2(\text{dtbbpy})\text{PF}_6$  (5.6 mg, 0.005 mmol) and THF (2.5 mL) were placed. COWare was removed from the glovebox. Chamber 1 was placed inside the oil bath, while Chamber 2 was placed 5 cm away from the Kessil H150 Blue LED and fan (Figure S1). Chamber 1 was warmed to  $80\text{ }^\circ\text{C}$  for 10 min to generate  $^{13}\text{CO}$  (the temperature of Chamber 2 was  $32\text{ }^\circ\text{C}$ ) then cooled to room temperature. The reaction proceeded at room temperature for 12 h. The reaction mixture in Chamber 2 was diluted with dichloromethane, and filtered with celite to remove the insoluble solids. The volatile solvent was evaporated, and the crude product was purified with silica column chromatography using hexane and ethyl acetate as eluent. 14.1 mg (27%) of the desired product is obtained. The  $^{13}\text{CO}$  incorporation ratio was analyzed with an inverse-gated  $^{13}\text{C}$  NMR experiment. 6.7 mg (0.032 mmol) of product was mixed with independently-synthesized  $\text{PhCH}_2\text{CH}_2^{13}\text{CN}$  (4.2 mg, 0.032 mmol). The mixture was dissolved in  $\text{CDCl}_3$ , and inverse-gated  $^{13}\text{C}$  NMR analysis was performed. The direct integration comparison revealed that the  $^{13}\text{C}$  incorporation ratio into the acyl carbon was 24% (Figure S2).

**Figure S1.** Two chamber reaction set-up for  $^{13}\text{C}$  incorporation experiment

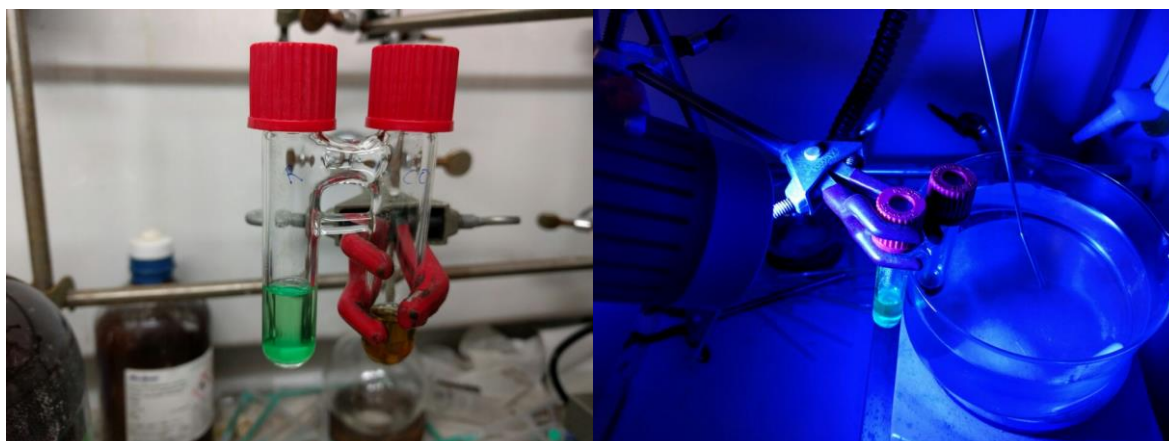

**Figure S2.** Inverse-gated  $^{13}\text{C}$  NMR experiment

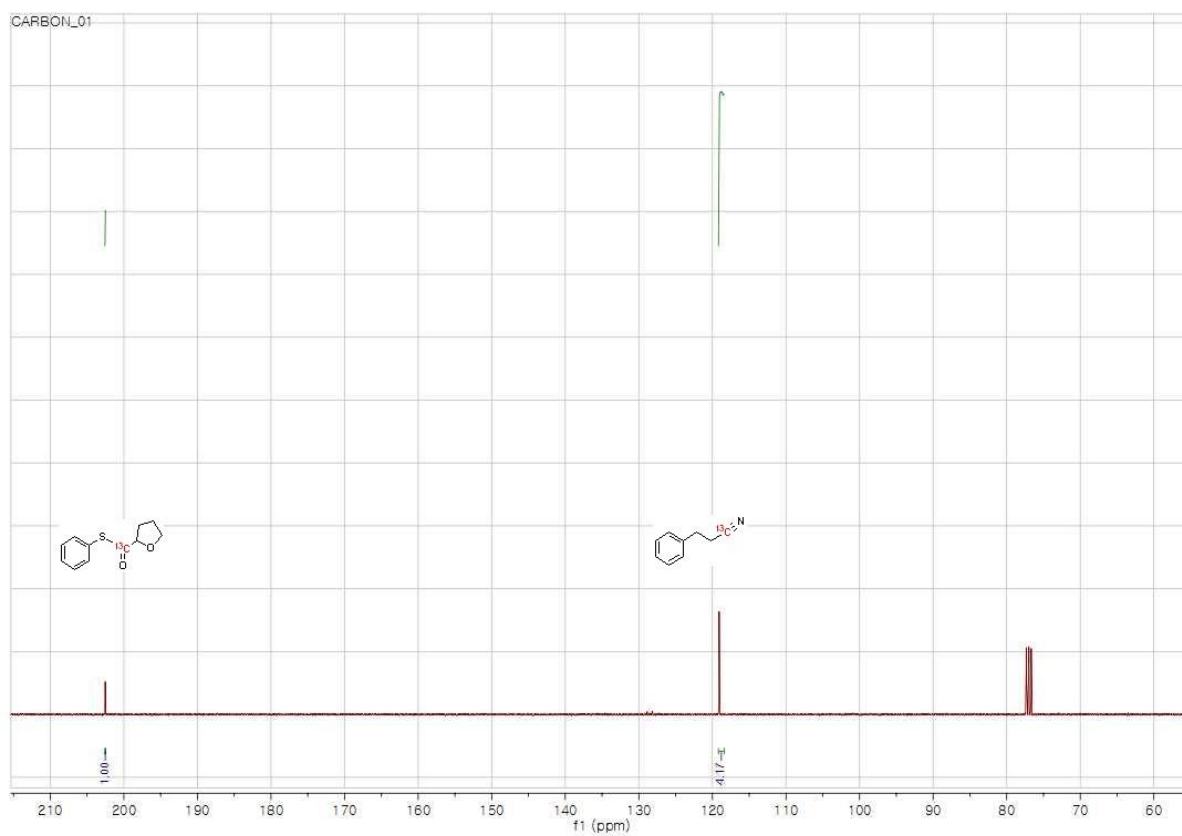



## 5. Deuterium incorporation experiment

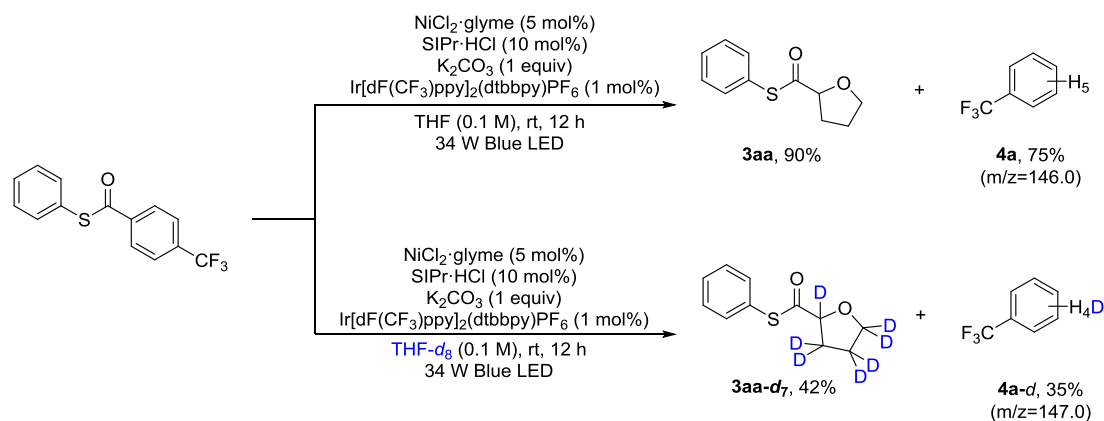

NiCl<sub>2</sub>·glyme (2.7 mg, 0.0125 mmol), 1,3-bis(2,6-diisopropylphenyl)imidazolium chloride (SIPr·HCl, 10.7 mg, 0.025 mmol), and K<sub>2</sub>CO<sub>3</sub> (34.6 mg, 0.25 mmol) were placed in an 4 mL vial inside the glove box. 2.5 mL of THF-*d*<sub>8</sub> was added to the vial, and the mixture stirred at room temperature for 10 min. **1a** (70.6 mg, 0.25 mmol) and Ir[dF(CF<sub>3</sub>)ppy]<sub>2</sub>(dtbbpy)PF<sub>6</sub> (2.8 mg, 0.0025 mmol) were added to the vial. The vial was taken out of the glove box and stirred at room temperature for 12 h under irradiation from a Kessil H150 Blue light and fan (the vial was placed at least 5 cm away from the light to minimize heating). When the reaction was complete, the mixture was diluted with dichloromethane, and dodecane (28.4 μl, 0.125 mmol) was added as standard for quantitative GC analysis. Deuterium incorporation in α,α,α-trifluorotoluene (**4a-d**) was confirmed by GC-MS analysis of crude reaction mixture (Figure S3). **3aa-d<sub>7</sub>** was purified with silica chromatography to report the isolated yield.

**Figure S3.** GC-MS result of **4a** and **4a-d**

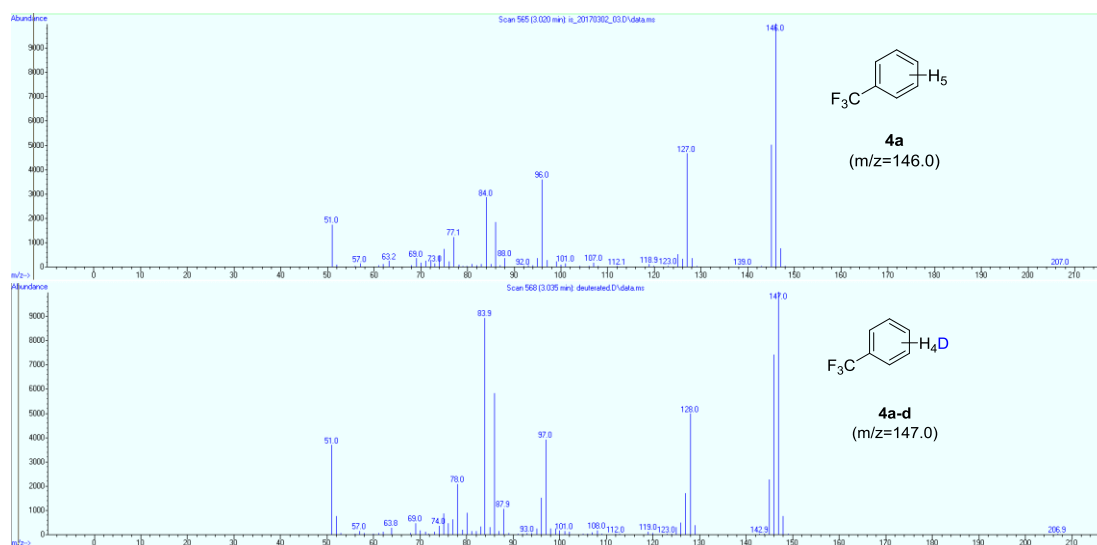

## 6. Cyclic voltammetry (CV) studies

### (a) Conversion constant calibration

<Electrode composition>

Working electrode: glassy carbon electrode.

Reference electrode: Ag/AgNO<sub>3</sub> (0.01 M) in acetonitrile with TBAP 0.1 M.

Counter electrode: Pt wire electrode.

<Procedure>

Ferrocene (**Fc**, 0.001 M) and Tetrabutylammonium perchlorate (TBAP, 0.1 M) in acetonitrile were transferred to an electrochemical cell equipped with three electrode system. Scan rate: 0.01 V/s. Scan range: -0.04 to +0.2 V.

**Figure S4.** Cyclic voltammogram of **Fc/Fc<sup>+</sup>**

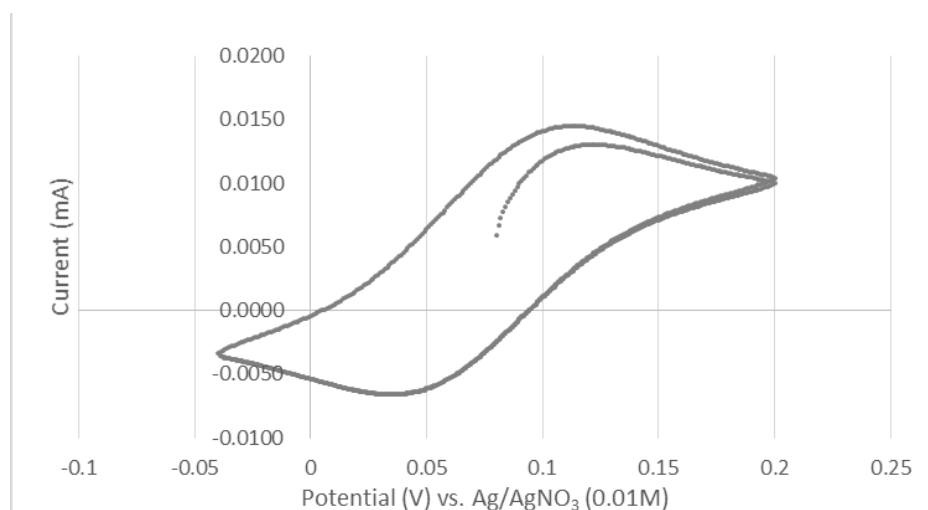

$E_{1/2}[\text{Fc}^+/\text{Fc}] = 0.074 \text{ V vs Ag/AgNO}_3 (0.01 \text{ M})$  in acetonitrile.

$E_{1/2}[\text{Fc}^+/\text{Fc}] = 0.380 \text{ V vs SCE}$  in acetonitrile. (reference value)

The conversion constant between the reference electrode and SCE is calculated as +0.31 V.

**(b) Thioester 1a**

<Electrode composition>

Working electrode: glassy carbon electrode.

Reference electrode: Ag/AgNO<sub>3</sub> (0.01 M) in acetonitrile with TBAP 0.1 M.

Counter electrode: Pt wire electrode.

<Procedure>

The mixture of **1a** (0.001 M) and TBAP (0.1 M) in acetonitrile was transferred to an electrochemical cell equipped with a three electrode system. Scan rate: 0.1 V/s. Scan range: 0 to -2.5 V.

**Figure S5.** Cyclic voltammogram of thioester **1a**

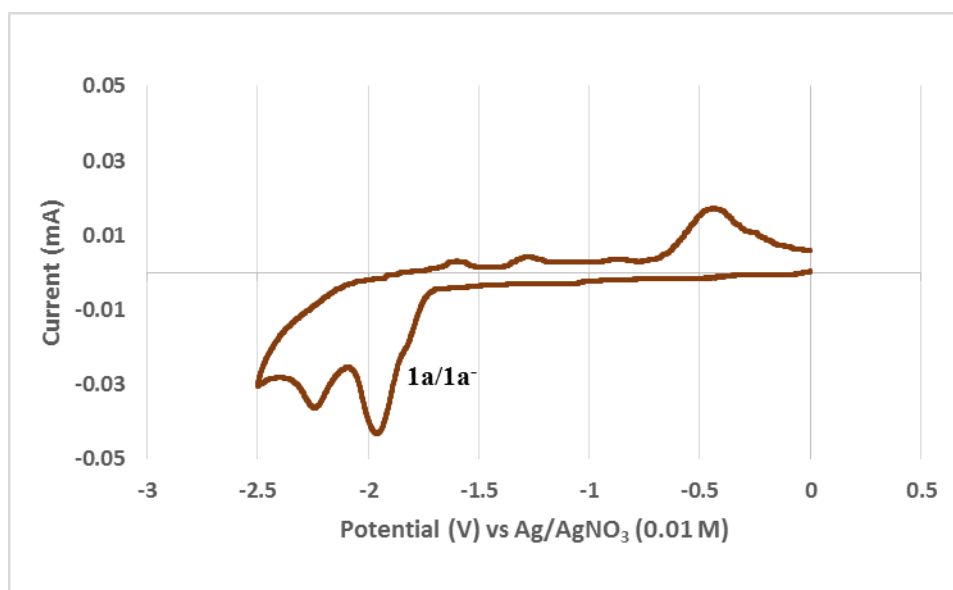

$E_P[1a/1a^-] = -1.96 \text{ V vs Ag/AgNO}_3 (0.01M); -1.65 \text{ V vs SCE}$

$E_{P/2}[1a/1a^-] = -1.84 \text{ V vs Ag/AgNO}_3 (0.01M); -1.53 \text{ V vs SCE}$

**(c) Thioester **1a** + MgCl<sub>2</sub>**

<Electrode composition>

Working electrode: glassy carbon electrode.

Reference electrode: Ag/AgNO<sub>3</sub> (0.01 M) in acetonitrile with TBAP 0.1 M.

Counter electrode: Pt wire electrode.

<Procedure>

The mixture of **1a** (0.001 M), MgCl<sub>2</sub> (0.001 M), and TBAP (0.1 M) in acetonitrile was stirred in room temperature for 3 h. Then the mixture is transferred to an electrochemical cell equipped with a three electrode system. Scan rate: 0.1 V/s. Scan range: 0 to -2.5 V.

**Figure S6.** Cyclic voltammogram of (**1a** + MgCl<sub>2</sub>) mixture

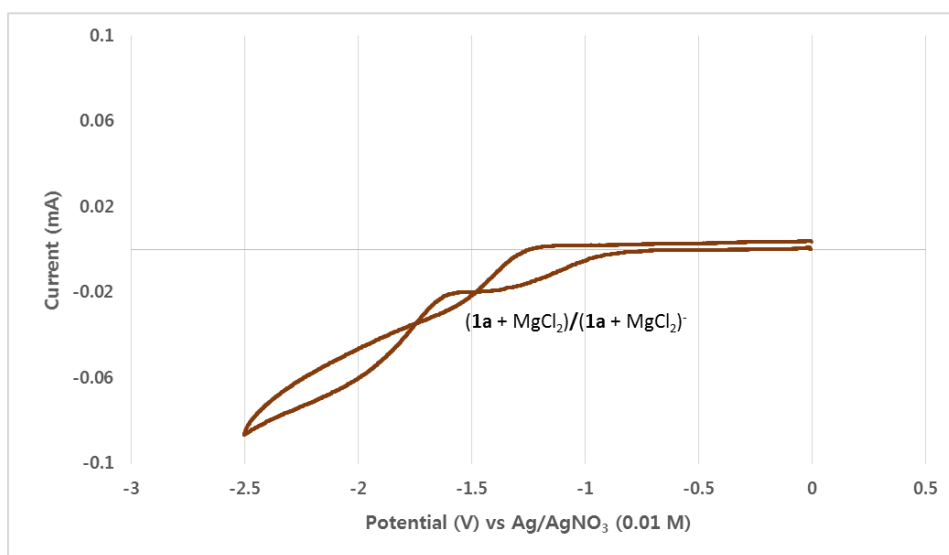

$E_P[(\mathbf{1a} + \text{MgCl}_2)/(\mathbf{1a} + \text{MgCl}_2)^-] = -1.52 \text{ V vs Ag/AgNO}_3 (0.01\text{M}); -1.21 \text{ V vs SCE}$

$E_{P/2}[(\mathbf{1a} + \text{MgCl}_2)/(\mathbf{1a} + \text{MgCl}_2)^-] = -1.18 \text{ V vs Ag/AgNO}_3 (0.01\text{M}); -0.87 \text{ V vs SCE}$

**(d) [(SIPr)NiCl]<sub>2</sub>(μ-Cl)<sub>2</sub> ([Ni-II])**

<Electrode composition>

Working electrode: glassy carbon electrode.

Reference electrode: Ag/AgNO<sub>3</sub> (0.01 M) in acetonitrile with TBAP 0.1 M.

Counter electrode: Pt wire electrode

<Procedure>

[(SIPr)NiCl]<sub>2</sub>(μ-Cl)<sub>2</sub> (0.001 M) and TBAP (0.1 M) in acetonitrile were transferred to an electrochemical cell equipped with three electrode system under argon atmosphere. Scan rate: 0.1 V/s. Scan range: -1.0 to +1.0 V.

**Figure S7.** Cyclic voltammogram of [(SIPr)NiCl]<sub>2</sub>(μ-Cl)<sub>2</sub> (Ni-II)

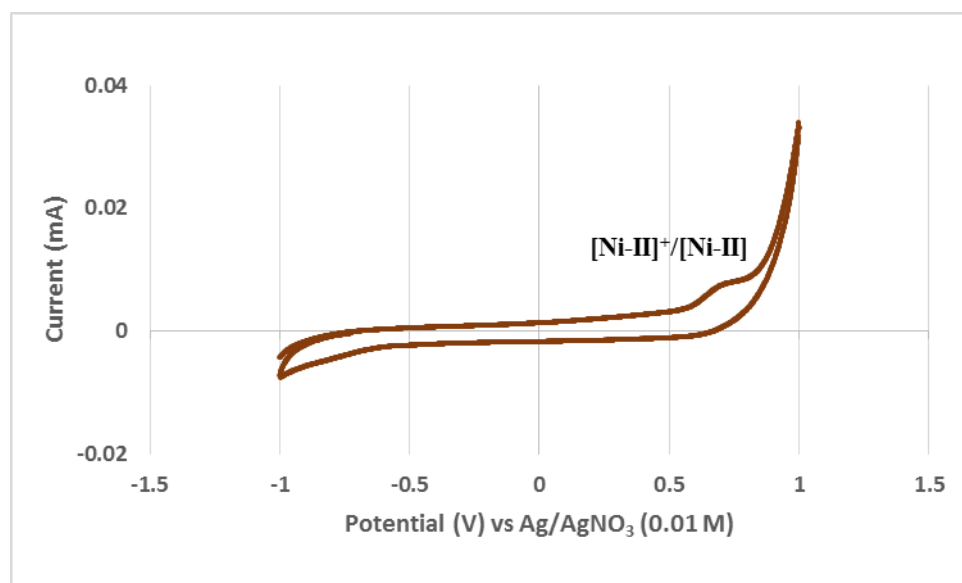

$$E_P[[\text{Ni-II}]^+ / [\text{Ni-II}]] = +0.70 \text{ V vs Ag/AgNO}_3(0.01\text{M}); +1.01 \text{ V vs SCE}$$

$$E_{P/2}[[\text{Ni-II}]^+ / [\text{Ni-II}]] = +0.64 \text{ V vs. Ag/AgNO}_3(0.01\text{M}); +0.95 \text{ V vs SCE}$$

## 7. DFT calculation results about bond dissociation energy (BDE) of thioesters

Bond dissociation energies were calculated as the change in the 'sum of electronic and thermal enthalpies' of the following reaction at 298 K in the gas-phase.

(1) C(acyl)-C cleavage

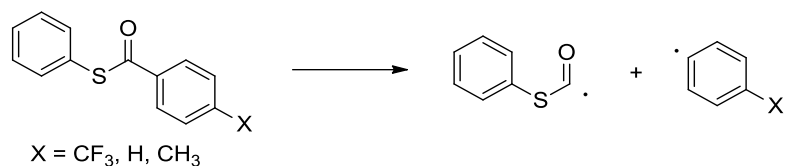

(2) S-C(acyl) cleavage

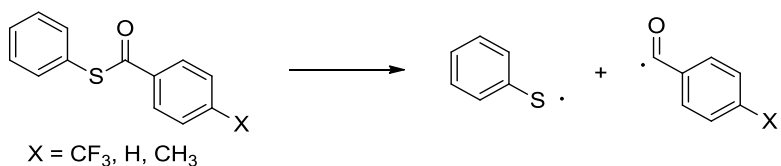

(3) C-S cleavage

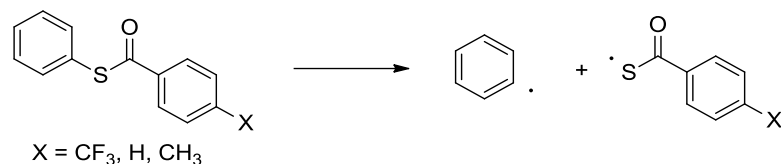

All calculations were performed with the Gaussian 09 program set. For all calculations, UB3LYP functional was used. Geometry optimization and frequency calculations were carried out using 6-311++g(d, p) level basis set in all atoms in the gas phase. No imaginary frequency was obtained in all cases.

**Table S3.** Bond dissociation energy (BDE) calculation results

| BDE (kcal/mol) | X = CF <sub>3</sub> | X = H | X = CH <sub>3</sub> |
|----------------|---------------------|-------|---------------------|
| (1)            | 85.1                | 85.0  | 86.7                |
| (2)            | 64.4                | 64.0  | 63.6                |
| (3)            | 76.2                | 75.5  | 75.3                |

## 8. Synthesis and characterization of nickel complexes

### [(SIPr)NiCl]<sub>2</sub>(μ-Cl)<sub>2</sub> ([Ni-II]) complex

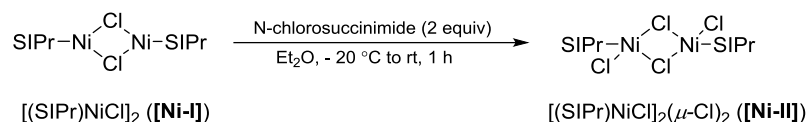

The complex was synthesized using a modified procedure of a similar N-heterocyclic carbene coordinated Ni(II) complex.<sup>5</sup> All experiments were performed under argon atmosphere. [(SIPr)NiCl]<sub>2</sub> was synthesized following literature procedure.<sup>6</sup> Synthesized [(SIPr)NiCl]<sub>2</sub> (35.8 mg, 0.037 mmol) and *N*-chlorosuccinimide (10.0 mg, 0.075 mmol) were separately dissolved in 5 mL of diethylether (Et<sub>2</sub>O). Each solution was cooled to -20 °C. Then combined to give a purple solution. The solution was warmed to room temperature and stirred for an additional 1 h. Solvent was removed under vacuum to give a purple solid which was washed with pentane, and dried in vacuo. After collecting the purple solid, it was dissolved in a minimal amount of dichloromethane. Addition of 10 mL of pentane generated a white precipitate (within 1 h) that was removed by celite filter to give a clean purple solution. Evaporation of the solvent gave a lavender solid, which was again dissolved in a minimal amount of dichloromethane. Gradual evaporation of dichloromethane at -20 °C provided a lavender solid (5.1 mg, 0.0049 mmol) with purity suitable for single crystal X-ray analysis. <sup>1</sup>H NMR (CD<sub>2</sub>Cl<sub>2</sub>, 500 MHz) δ = 1.03 (d, *J* = 6.8 Hz, 12 H), 1.29 (d, *J* = 6.8 Hz, 12 H), 2.95 (m, 4H), 3.00 (s, 4H), 7.21 (d, *J* = 7.6 Hz, 4 H), 7.42 (t, *J* = 7.6 Hz, 2 H); <sup>13</sup>C NMR (CD<sub>2</sub>Cl<sub>2</sub>, 126 MHz) δ = 224.2, 156.9, 146.5, 129.5, 124.9, 29.5, 26.4, 24.4;

**Figure S8.** Single crystal structure of  $[(\text{SIPr})\text{NiCl}]_2(\mu\text{-Cl})_2$  (**[Ni-II]**)

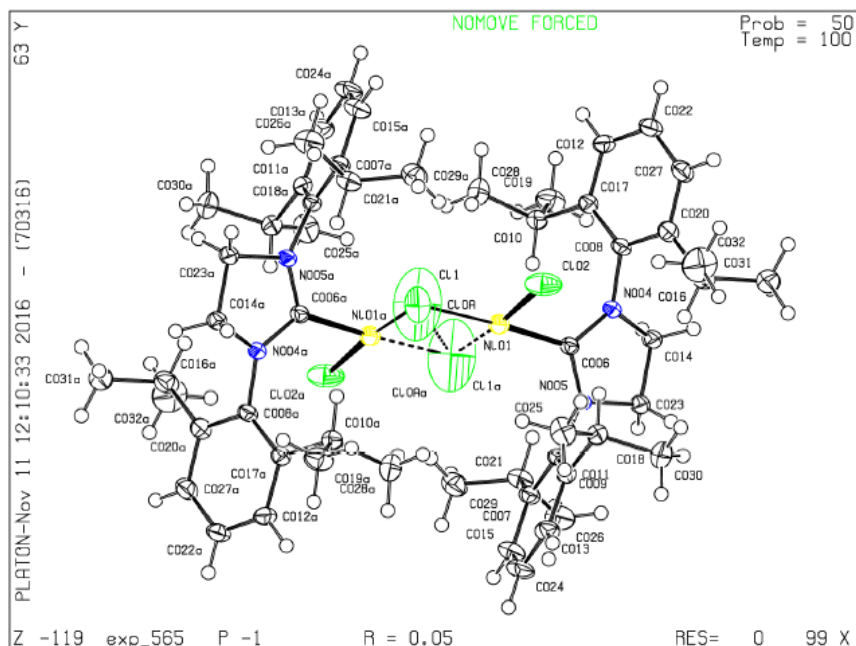

The complete data for this structure is on file with the CCDC under entry 1516709.

**Table S4.** Crystal data and structure refinement for **[Ni-II]**

|                                                |                                                              |
|------------------------------------------------|--------------------------------------------------------------|
| Identification code                            | exp_565                                                      |
| Empirical formula                              | $\text{C}_{54}\text{H}_{76}\text{Cl}_4\text{N}_4\text{Ni}_2$ |
| Formula weight                                 | 1040.40                                                      |
| Temperature/K                                  | 99.9(5)                                                      |
| Crystal system                                 | triclinic                                                    |
| Space group                                    | P-1                                                          |
| a/Å                                            | 9.8953(4)                                                    |
| b/Å                                            | 12.1959(5)                                                   |
| c/Å                                            | 12.3731(5)                                                   |
| $\alpha/^\circ$                                | 110.000(4)                                                   |
| $\beta/^\circ$                                 | 107.743(3)                                                   |
| $\gamma/^\circ$                                | 96.007(3)                                                    |
| Volume/Å <sup>3</sup>                          | 1299.50(10)                                                  |
| Z                                              | 1                                                            |
| $\rho_{\text{calc}}/\text{cm}^3$               | 1.329                                                        |
| $\mu/\text{mm}^{-1}$                           | 3.084                                                        |
| F(000)                                         | 552.0                                                        |
| Crystal size/mm <sup>3</sup>                   | 0.083 × 0.053 × 0.028                                        |
| Radiation                                      | $\text{CuK}\alpha$ ( $\lambda = 1.54184$ )                   |
| 2 $\theta$ range for data collection/ $^\circ$ | 7.934 to 153.094                                             |
| Index ranges                                   | $-12 \leq h \leq 11, -15 \leq k \leq 15, -15 \leq l \leq 15$ |
| Reflections collected                          | 21503                                                        |



|                                                |                                                                  |
|------------------------------------------------|------------------------------------------------------------------|
| Independent reflections                        | 5427 [ $R_{\text{int}} = 0.0336$ , $R_{\text{sigma}} = 0.0295$ ] |
| Data/restraints/parameters                     | 5427/0/306                                                       |
| Goodness-of-fit on $F^2$                       | 1.060                                                            |
| Final R indexes [ $I \geq 2\sigma(I)$ ]        | $R_1 = 0.0535$ , $wR_2 = 0.1521$                                 |
| Final R indexes [all data]                     | $R_1 = 0.0604$ , $wR_2 = 0.1583$                                 |
| Largest diff. peak/hole / $e \text{ \AA}^{-3}$ | 0.51/-1.36                                                       |

**Table S5.** Fractional Atomic Coordinates ( $\times 10^4$ ) and Equivalent Isotropic Displacement Parameters ( $\text{\AA}^2 \times 10^3$ ) for **[Ni-II]**.  $U_{\text{eq}}$  is defined as 1/3 of the trace of the orthogonalised  $U^{ij}$  tensor.

| Atom | x         | Y          | z          | U(eq)     |
|------|-----------|------------|------------|-----------|
| Ni01 | 4440.2(5) | 9106.1(4)  | 3692.4(4)  | 26.26(16) |
| Cl02 | 5511.7(8) | 8389.4(8)  | 2430.7(8)  | 42.7(2)   |
| N004 | 1879(2)   | 8377.8(17) | 1495.7(18) | 18.7(4)   |
| N005 | 1608(2)   | 7569.0(18) | 2759.9(18) | 19.3(4)   |
| C006 | 2568(3)   | 8273(2)    | 2557(2)    | 18.0(4)   |
| C007 | 1261(3)   | 7222(2)    | 4492(2)    | 22.2(5)   |
| C008 | 2447(3)   | 8952(2)    | 833(2)     | 20.5(5)   |
| C009 | 1937(3)   | 6993(2)    | 3619(2)    | 19.4(5)   |
| C010 | 2501(3)   | 11009(2)   | 2365(2)    | 25.8(5)   |
| C011 | 2775(3)   | 6123(2)    | 3475(2)    | 21.1(5)   |
| C012 | 3058(3)   | 10688(2)   | 435(2)     | 26.6(5)   |
| C013 | 2926(3)   | 5495(2)    | 4240(3)    | 26.8(5)   |
| C014 | 299(3)    | 7859(2)    | 1010(2)    | 22.8(5)   |
| C015 | 1439(3)   | 6560(3)    | 5226(3)    | 29.3(6)   |
| C016 | 2441(3)   | 6860(2)    | -617(3)    | 31.5(6)   |
| C017 | 2666(3)   | 10197(2)   | 1198(2)    | 22.1(5)   |
| C018 | 3487(3)   | 5834(2)    | 2515(2)    | 23.4(5)   |
| C019 | 1277(4)   | 11650(3)   | 2063(3)    | 35.6(6)   |
| C020 | 2626(3)   | 8204(2)    | -242(2)    | 24.0(5)   |
| C021 | 312(3)    | 8125(2)    | 4649(2)    | 26.3(5)   |
| C022 | 3216(3)   | 9977(3)    | -638(3)    | 29.3(6)   |
| C023 | 205(3)    | 7061(2)    | 1707(2)    | 24.2(5)   |
| C024 | 2258(3)   | 5701(3)    | 5101(3)    | 31.3(6)   |
| C025 | 5077(3)   | 5793(3)    | 3068(3)    | 35.7(6)   |
| C026 | -1288(3)  | 7474(3)    | 4234(3)    | 35.2(6)   |
| C027 | 3003(3)   | 8741(3)    | -971(2)    | 27.7(5)   |
| C028 | 3942(4)   | 11914(3)   | 3250(3)    | 39.9(7)   |
| C029 | 831(4)    | 9061(3)    | 5979(3)    | 35.7(6)   |
| C030 | 2642(4)   | 4657(3)    | 1417(3)    | 36.3(6)   |
| C031 | 1132(4)   | 6151(3)    | -1818(3)   | 40.3(7)   |

|      |         |            |            |         |
|------|---------|------------|------------|---------|
| C032 | 3828(5) | 6474(3)    | -751(4)    | 54.2(9) |
| Cl1  | 6649(2) | 9959.2(15) | 5037.6(13) | 62.8(4) |
| Cl0A | 5984(6) | 10287(8)   | 5097(7)    | 145(4)  |

## 9. Characterization of products

**1a**,<sup>7</sup> **4a**,<sup>8</sup> **5a**,<sup>9</sup> [(SIPr)NiCl]<sub>2</sub> ([Ni-I]),<sup>6</sup> are identified by spectral comparison with literature data.

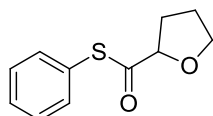

**S-Phenyl tetrahydrofuran-2-carbothioate (3aa)**<sup>10</sup>: yellow oil (43.1 mg, 0.207 mmol, 83%); <sup>1</sup>H NMR (CDCl<sub>3</sub>, 500 MHz)  $\delta$  = 1.97 (m, 1H), 2.04 (m, 1H), 2.15 (m, 1H), 2.30 (m, 1H), 4.02 (q,  $J$  = 6.8 Hz, 1H), 4.17 (q,  $J$  = 7.2 Hz, 1H), 4.59 (dd,  $J$  = 4.9, 8.9 Hz, 1H) 7.41 (s, 5H); <sup>13</sup>C NMR (CDCl<sub>3</sub>, 126 MHz)  $\delta$  = 202.5, 134.6, 129.2, 129.1, 127.7, 83.7, 70.1, 31.1, 25.3; HRMS-ESI ( $m/z$ ): [M+Na]<sup>+</sup> calcd for C<sub>11</sub>H<sub>12</sub>O<sub>2</sub>SNa: 231.0456. Found: 231.0450.

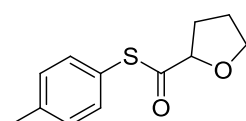

**S-(*p*-Tolyl)-tetrahydrofuran-2-carbothioate (3ba)**: yellow oil (44.5 mg, 0.200 mmol, 80%); <sup>1</sup>H NMR (CDCl<sub>3</sub>, 500 MHz)  $\delta$  = 1.97 (m, 1H), 2.03 (m, 1H), 2.14 (m, 1H), 2.28 (m, 1H), 2.37 (s, 3H), 4.01 (q,  $J$  = 6.6 Hz, 1H), 4.16 (q,  $J$  = 6.6 Hz, 1H), 4.59 (m, 1H), 7.16-7.34 (dd,  $J$  = 7.5, 31.7 Hz, 4H); <sup>13</sup>C NMR (CDCl<sub>3</sub>, 126 MHz)  $\delta$  = 202.9, 139.5, 134.6, 130.0, 124.0, 83.7, 70.1, 31.2, 25.3, 21.3; HRMS-ESI ( $m/z$ ): [M+Na]<sup>+</sup> calcd for C<sub>12</sub>H<sub>14</sub>O<sub>2</sub>SNa: 245.0612. Found: 245.0609.

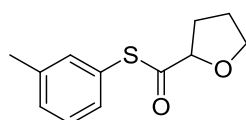

**S-(*m*-Tolyl)-tetrahydrofuran-2-carbothioate (3ca)**: yellow oil (49.8 mg, 0.224 mmol, 90%); <sup>1</sup>H NMR (CDCl<sub>3</sub>, 500 MHz)  $\delta$  = 1.98 (m, 1H), 2.03 (m, 1H), 2.15 (m, 1H), 2.29 (m, 1H), 2.37 (s, 3H), 4.02 (q,  $J$  = 6.6 Hz, 1H), 4.16 (q,  $J$  = 6.6 Hz, 1H), 4.59 (m, 1H), 7.20 (m, 3H), 7.30 (m, 1H); <sup>13</sup>C NMR (CDCl<sub>3</sub>, 126 MHz)  $\delta$  = 202.7, 139.0, 135.2, 131.7, 130.1, 129.0, 127.3, 83.7, 70.1, 31.2, 25.3, 21.3; HRMS-ESI ( $m/z$ ): [M+Na]<sup>+</sup> calcd for C<sub>12</sub>H<sub>14</sub>O<sub>2</sub>SNa: 245.0612. Found: 245.0609.

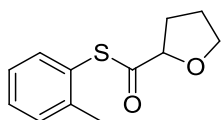

**S-(*o*-Tolyl)-tetrahydrofuran-2-carbothioate (3da):** yellow oil (39.6 mg, 0.178 mmol, 71%);  $^1\text{H}$  NMR ( $\text{CDCl}_3$ , 500 MHz)  $\delta$  = 1.98 (m, 1H), 2.05 (m, 1H), 2.14 (m, 1H), 2.29 (m, 1H), 2.33 (s, 3H), 4.03 (q,  $J$  = 6.9 Hz, 1H), 4.20 (q,  $J$  = 6.9 Hz, 1H), 4.59 (dd,  $J$  = 4.9, 8.6 Hz, 1H), 7.22 (m, 1H), 7.28-7.40 (m, 3H);  $^{13}\text{C}$  NMR ( $\text{CDCl}_3$ , 126 MHz)  $\delta$  = 202.0, 142.2, 136.0, 130.7, 129.9, 127.0, 126.6, 83.8, 70.1, 31.2, 25.3, 20.6; HRMS-ESI ( $m/z$ ):  $[\text{M}+\text{Na}]^+$  calcd for  $\text{C}_{12}\text{H}_{14}\text{O}_2\text{SNa}$ : 245.0612. Found: 245.0607.

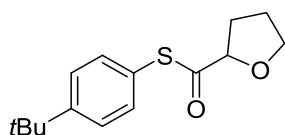

**S-[4-(*tert*-butyl)-phenyl]-tetrahydrofuran-2-carbothioate (3ea):** yellow oil (53.9 mg, 0.204 mmol, 82%);  $^1\text{H}$  NMR ( $\text{CDCl}_3$ , 500 MHz)  $\delta$  = 1.34 (s, 9H), 1.98 (m, 1H), 2.04 (m, 1H), 2.16 (m, 1H), 2.30 (m, 1H), 4.03 (q,  $J$  = 7.3 Hz, 1H), 4.17 (q,  $J$  = 7.3 Hz, 1H), 4.60 (dd,  $J$  = 4.9, 8.5 Hz, 1H), 7.34 (d,  $J$  = 8.3 Hz, 2H), 7.44 (d,  $J$  = 8.3 Hz, 2H);  $^{13}\text{C}$  NMR ( $\text{CDCl}_3$ , 126 MHz)  $\delta$  = 202.9, 152.4, 134.2, 126.3, 124.1, 83.7, 70.1, 34.7, 31.2(1), 31.1(6), 25.3; HRMS-ESI ( $m/z$ ):  $[\text{M}+\text{Na}]^+$  calcd for  $\text{C}_{15}\text{H}_{20}\text{O}_2\text{SNa}$ : 287.1082. Found: 287.1077.

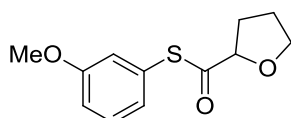

**S-(3-Methoxyphenyl)-tetrahydrofuran-2-carbothioate (3fa):** yellow oil (53.6 mg, 0.225 mmol, 90%);  $^1\text{H}$  NMR ( $\text{CDCl}_3$ , 500 MHz)  $\delta$  = 1.97 (m, 1H), 2.03 (m, 1H), 2.15 (m, 1H), 2.29 (m, 1H), 3.81 (s, 3H), 4.01 (q,  $J$  = 7.0 Hz, 1H), 4.16 (q,  $J$  = 7.0 Hz, 1H), 4.59 (dd,  $J$  = 5.0, 8.8 Hz, 1H), 6.90-7.03 (m, 3H), 7.32 (t,  $J$  = 7.7 Hz, 1H);  $^{13}\text{C}$  NMR ( $\text{CDCl}_3$ , 75 MHz)  $\delta$  = 202.4, 159.8, 129.9, 128.6, 126.8, 119.7, 115.4, 83.7, 70.1, 55.3, 31.1, 25.3; HRMS-ESI ( $m/z$ ):  $[\text{M}+\text{Na}]^+$  calcd for  $\text{C}_{12}\text{H}_{14}\text{O}_3\text{SNa}$ : 261.0561. Found: 261.0555.

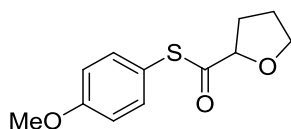

**S-(4-Methoxyphenyl)-tetrahydrofuran-2-carbothioate (3ga):** yellow oil (42.7 mg, 0.179

mmol, 72%);  $^1\text{H}$  NMR ( $\text{CDCl}_3$ , 500 MHz)  $\delta$  = 1.97 (m, 1H), 2.02 (m, 1H), 2.13 (m, 1H), 2.28 (m, 1H), 3.82 (s, 3H), 4.01 (q,  $J$  = 7.1 Hz, 1H), 4.15 (q,  $J$  = 7.1 Hz, 1H), 4.58 (dd,  $J$  = 5.0, 8.7 Hz, 1H), 6.94 (d,  $J$  = 8.4 Hz, 2H), 7.30 (d,  $J$  = 8.4 Hz, 2H);  $^{13}\text{C}$  NMR ( $\text{CDCl}_3$ , 126 MHz)  $\delta$  = 203.3, 160.5, 136.1, 118.2, 114.9, 83.7, 70.0, 55.3, 31.1, 25.3; HRMS-ESI ( $m/z$ ):  $[\text{M}+\text{Na}]^+$  calcd for  $\text{C}_{12}\text{H}_{14}\text{O}_3\text{SNa}$ : 261.0561. Found: 261.0555.

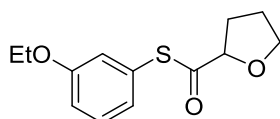

**S-(3-Ethoxyphenyl)-tetrahydrofuran-2-carbothioate (3ha)**: yellow oil (40.0 mg, 0.158 mmol, 63%);  $^1\text{H}$  NMR ( $\text{CDCl}_3$ , 500 MHz)  $\delta$  = 1.33 (t,  $J$  = 7.0 Hz, 3H), 2.03 (m, 2H), 2.07 (m, 1H), 2.20 (m, 1H), 3.95 (m, 3H), 4.08 (q,  $J$  = 7.0 Hz, 1H), 4.50 (dd,  $J$  = 5.0, 4.8 Hz, 1H), 6.87 (m, 3H), 7.22 (t,  $J$  = 7.7 Hz, 1H);  $^{13}\text{C}$  NMR ( $\text{CDCl}_3$ , 75 MHz)  $\delta$  = 202.5, 159.2, 129.9, 128.6, 126.6, 120.3, 115.8, 83.7, 70.1, 63.6, 31.2, 25.3, 14.8; HRMS-ESI ( $m/z$ ):  $[\text{M}+\text{Na}]^+$  calcd for  $\text{C}_{13}\text{H}_{16}\text{O}_3\text{SNa}$ : 275.0718. Found: 275.0713.

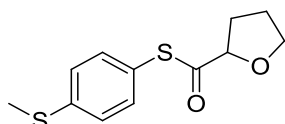

**S-[4-(methylthio)-phenyl]-tetrahydrofuran-2-carbothioate (3ia)**: yellow oil (51.3 mg, 0.202 mmol, 81%);  $^1\text{H}$  NMR ( $\text{CDCl}_3$ , 500 MHz)  $\delta$  = 1.97 (m, 1H), 2.02 (m, 1H), 2.14 (m, 1H), 2.28 (m, 1H), 2.48 (d,  $J$  = 0.4 Hz, 3H), 4.01 (q,  $J$  = 7.0 Hz, 1H), 4.15 (q,  $J$  = 7.0 Hz, 1H), 4.58 (dd,  $J$  = 4.9, 8.8 Hz, 1H), 7.27 (m, 4H);  $^{13}\text{C}$  NMR ( $\text{CDCl}_3$ , 126 MHz)  $\delta$  = 202.7, 140.7, 134.9, 126.6, 123.4, 83.7, 70.1, 31.2, 25.3, 15.3; HRMS-ESI ( $m/z$ ):  $[\text{M}+\text{Na}]^+$  calcd for  $\text{C}_{12}\text{H}_{14}\text{O}_2\text{S}_2\text{Na}$ : 277.0333. Found: 277.0325.

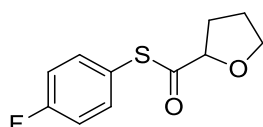

**S-(4-Fluorophenyl)-tetrahydrofuran-2-carbothioate (3ja)**: yellow oil (44.6 mg, 0.197 mmol, 79%);  $^1\text{H}$  NMR ( $\text{CDCl}_3$ , 500 MHz)  $\delta$  = 1.98 (m, 1H), 2.03 (m, 1H), 2.13 (m, 1H), 2.29 (m, 1H), 4.01 (q,  $J$  = 7.6 Hz, 1H), 4.15 (q,  $J$  = 7.6 Hz, 1H), 4.58 (dd,  $J$  = 5.0, 8.5 Hz, 1H), 7.10 (m, 2H), 7.36 (m, 2H);  $^{13}\text{C}$  NMR ( $\text{CDCl}_3$ , 126 MHz)  $\delta$  = 202.6, 163.4 (d,  $J$  = 250.0 Hz), 136.6 (d,  $J$  = 8.1 Hz), 123.0

(d,  $J = 3.4$  Hz), 116.4 (d,  $J = 22.0$  Hz), 83.6, 70.1, 31.2, 25.3; HRMS-ESI ( $m/z$ ):  $[M+Na]^+$  calcd for  $C_{11}H_{11}O_2SFNa$ : 249.0361. Found: 249.0356.

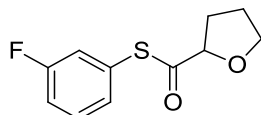

**S-(3-Fluorophenyl)-tetrahydrofuran-2-carbothioate (3ka)**: yellow oil (43.5 mg, 0.192 mmol, 77%);  $^1H$  NMR ( $CDCl_3$ , 500 MHz)  $\delta = 1.98$  (m, 1H), 2.03 (m, 1H), 2.15 (m, 1H), 2.30 (m, 1H), 4.02 (q,  $J = 7.0$  Hz, 1H), 4.16 (q,  $J = 7.0$  Hz, 1H), 4.59 (dd,  $J = 4.9, 8.7$  Hz, 1H), 7.05-7.21 (m, 3H), 7.37 (m, 1H);  $^{13}C$  NMR ( $CDCl_3$ , 126 MHz)  $\delta = 201.9, 162.5$  (d,  $J = 250.0$  Hz), 130.3 (d,  $J = 8.1$  Hz), 130.2 (d,  $J = 2.9$  Hz), 129.7 (d,  $J = 7.7$  Hz), 121.5 (d,  $J = 23.7$  Hz), 116.3 (d,  $J = 22.0$  Hz), 83.6, 70.1, 31.2, 25.3; HRMS-EI ( $m/z$ ):  $[M - (THF-CO)]^+$  calcd for  $C_6H_4SF$ : 127.0018. Found: 127.0021.

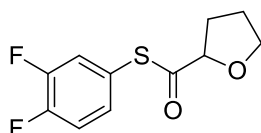

**S-(3,4-Difluorophenyl)-tetrahydrofuran-2-carbothioate (3la)**: yellow oil (50.9 mg, 0.208 mmol, 83%);  $^1H$  NMR ( $CDCl_3$ , 500 MHz)  $\delta = 2.00$  (m, 2H), 2.12 (m, 1H), 2.30 (m, 1H), 4.01 (q,  $J = 6.9$  Hz, 1H), 4.14 (q,  $J = 6.9$  Hz, 1H), 4.58 (dd,  $J = 4.9, 8.5$  Hz, 1H), 7.09-7.14 (m, 1H), 7.16-7.27 (m, 2H);  $^{13}C$  NMR ( $CDCl_3$ , 126 MHz)  $\delta = 202.0, 151.1$  (dd,  $J = 250.0, 13.8$  Hz), 150.3 (dd, 250.0, 15.1 Hz), 131.1 (m), 124.1 (m), 123.7 (dd,  $J = 17.6, 1.5$  Hz), 117.9 (dd,  $J = 16.8, 1.9$  Hz), 83.6, 70.1, 31.1, 25.3; HRMS-EI ( $m/z$ ):  $[M - (THF-CO)]^+$  calcd for  $C_6H_3SF_2$ : 144.9924. Found: 144.9926.

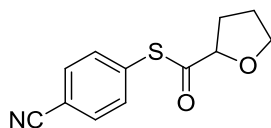

**S-(4-Cyanophenyl)-tetrahydrofuran-2-carbothioate (3ma)**: yellow oil (38.2 mg, 0.164 mmol, 66%);  $^1H$  NMR ( $CDCl_3$ , 500 MHz)  $\delta = 2.01$  (m, 2H), 2.14 (m, 1H), 2.32 (m, 1H), 4.03 (q,  $J = 6.8$  Hz, 1H), 4.16 (q,  $J = 6.8$  Hz, 1H), 4.60 (dd,  $J = 4.9, 8.3$  Hz, 1H), 7.52 (d,  $J = 8.4$  Hz, 2H), 7.68 (d,  $J = 8.4$  Hz, 2H);  $^{13}C$  NMR ( $CDCl_3$ , 126 MHz)  $\delta = 201.0, 134.9, 134.6, 132.4, 118.2, 112.8, 83.6, 70.2, 31.2, 25.3$ ; HRMS-ESI ( $m/z$ ):  $[M+Na]^+$  calcd for  $C_{12}H_{11}O_2NSNa$ : 256.0408. Found: 256.0407

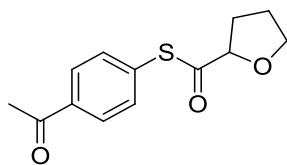

**S-(4-Acetylphenyl)-tetrahydrofuran-2-carbothioate (3na):** yellow oil (38.5 mg, 0.154 mmol, 62%);  $^1\text{H}$  NMR ( $\text{CDCl}_3$ , 500 MHz)  $\delta$  = 1.94 (m, 2H), 2.09 (m, 1H), 2.24 (m, 1H), 2.54 (s, 3H), 3.95 (q,  $J$  = 6.8 Hz, 1H), 4.09 (q,  $J$  = 6.8 Hz, 1H), 4.53 (dd,  $J$  = 4.8, 8.5 Hz, 1H), 7.44 (m, 2H), 7.90 (m, 2H);  $^{13}\text{C}$  NMR ( $\text{CDCl}_3$ , 126 MHz)  $\delta$  = 201.6, 197.4, 137.3, 134.5, 134.0, 128.8, 83.7, 70.2, 31.2, 26.7, 25.3; HRMS-ESI ( $m/z$ ):  $[\text{M}+\text{Na}]^+$  calcd for  $\text{C}_{13}\text{H}_{14}\text{O}_3\text{SNa}$ : 273.0561. Found: 273.0557.

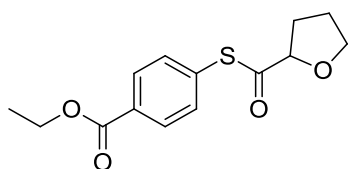

**Ethyl-4-[(tetrahydrofuran-2-carbonyl)thio]benzoate (3oa):** yellow oil (39.5 mg, 0.141 mmol, 56%);  $^1\text{H}$  NMR ( $\text{CDCl}_3$ , 500 MHz)  $\delta$  = 1.38 (t,  $J$  = 7.0 Hz, 3H), 1.98 (m, 1H), 2.03 (m, 1H), 2.14 (m, 1H), 2.30 (m, 1H), 4.01 (q,  $J$  = 6.9 Hz, 1H), 4.16 (q,  $J$  = 6.9 Hz, 1H), 4.38 (q,  $J$  = 7.0 Hz, 2H), 4.59 (dd,  $J$  = 4.8, 8.4 Hz, 1H), 7.47 (d,  $J$  = 8.5 Hz, 2H), 8.06 (d,  $J$  = 8.5 Hz, 2H);  $^{13}\text{C}$  NMR ( $\text{CDCl}_3$ , 126 MHz)  $\delta$  = 201.6, 166.0, 134.3, 133.5, 131.0, 130.0, 83.7, 70.1, 61.2, 31.2, 25.3, 14.3; HRMS(ESI) calcd for  $\text{C}_{14}\text{H}_{16}\text{O}_4\text{SNa}$ : 303.0667 Found: 303.0665

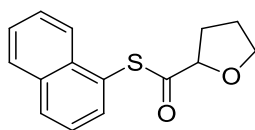

**S-Naphthalen-1-yl-tetrahydrofuran-2-carbothioate (3pa):** yellow solid (26.7 mg, 0.103 mmol, 41%);  $^1\text{H}$  NMR ( $\text{CDCl}_3$ , 500 MHz)  $\delta$  = 1.97 (m, 1H), 2.13 (m, 1H), 2.20 (m, 1H), 2.32 (m, 1H), 4.08 (q,  $J$  = 7.0 Hz, 1H), 4.28 (q,  $J$  = 7.0 Hz, 1H), 4.65 (dd,  $J$  = 4.7, 8.4 Hz, 1H), 7.53 (m, 3H), 7.68 (m, 1H), 7.89 (d,  $J$  = 8.5 Hz, 1H), 7.94 (d,  $J$  = 8.5 Hz, 1H), 8.14 (d,  $J$  = 8.1 Hz, 1H);  $^{13}\text{C}$  NMR ( $\text{CDCl}_3$ , 126 MHz)  $\delta$  = 202.0, 135.0, 134.5, 134.2, 130.7, 128.7, 127.0, 126.3, 125.6, 125.1, 125.0, 83.9, 70.2, 31.2, 25.4; HRMS-ESI ( $m/z$ ):  $[\text{M}+\text{Na}]^+$  calcd for  $\text{C}_{15}\text{H}_{14}\text{O}_2\text{SNa}$ : 281.0612. Found: 281.0606.

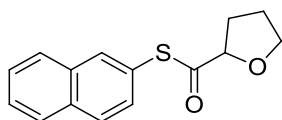

**S-Naphthalen-2-yl-tetrahydrofuran-2-carbothioate (3qa):** yellow solid (45.3 mg, 0.175 mmol, 70%);  $^1\text{H}$  NMR ( $\text{CDCl}_3$ , 500 MHz)  $\delta$  = 1.99 (m, 1H), 2.07 (m, 1H), 2.19 (m, 1H), 2.31 (m, 1H), 4.05 (q,  $J$  = 7.1 Hz, 1H), 4.21 (q,  $J$  = 7.1 Hz, 1H), 4.64 (dd,  $J$  = 4.8, 8.7 Hz, 1H), 7.44 (d,  $J$  = 7.8 Hz, 1H), 7.52 (m, 2H), 7.85 (m, 3H), 7.95 (s, 1H);  $^{13}\text{C}$  NMR ( $\text{CDCl}_3$ , 126 MHz)  $\delta$  = 202.8, 134.5, 133.6, 133.3, 131.1, 128.7, 127.9, 127.8, 127.0, 126.5, 125.0, 83.8, 70.1, 31.2, 25.3; HRMS-ESI ( $m/z$ ):  $[\text{M}+\text{Na}]^+$  calcd for  $\text{C}_{15}\text{H}_{14}\text{O}_2\text{SNa}$ : 281.0612. Found: 281.0607.

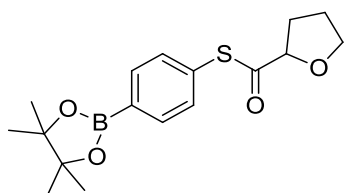

**S-[4-(4,4,5,5-tetramethyl-1,3,2-dioxaborolan-2-yl)phenyl]-tetrahydrofuran-2-carbothioate (3ra):** yellow oil (62.1 mg, 0.186 mmol, 74%);  $^1\text{H}$  NMR ( $\text{CDCl}_3$ , 500 MHz)  $\delta$  = 1.26 (s, 12H), 1.91 (m, 2H), 2.07 (m, 1H), 2.20 (m, 1H), 3.92 (q,  $J$  = 7.0 Hz, 1H), 4.07 (q,  $J$  = 7.0 Hz, 1H), 4.50 (dd,  $J$  = 4.7, 8.5 Hz, 1H), 7.32 (d,  $J$  = 8.2 Hz, 2H), 7.76 (d,  $J$  = 8.2 Hz, 2H);  $^{13}\text{C}$  NMR ( $\text{CDCl}_3$ , 126 MHz)  $\delta$  = 202.1, 135.3, 133.7, 131.1, 84.0, 83.7, 70.1, 31.2, 25.3, 24.9; HRMS-ESI ( $m/z$ ):  $[\text{M}+\text{Na}]^+$  calcd for  $\text{C}_{17}\text{H}_{23}\text{BO}_4\text{SNa}$ : 357.1308. Found: 357.1314.

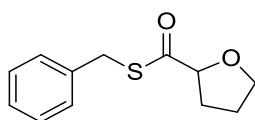

**S-benzyl tetrahydrofuran-2-carbothioate (3sa):** yellow oil (34.2 mg, 0.154 mmol, 62%);  $^1\text{H}$  NMR ( $\text{CDCl}_3$ , 500 MHz)  $\delta$  = 1.93 (m, 2H), 2.07 (m, 1H), 2.26 (m, 1H), 3.95 (q,  $J$  = 6.8 Hz, 1H), 4.05 (q,  $J$  = 6.8 Hz, 1H), 4.08 (s, 2H), 4.52 (dd,  $J$  = 5.0, 8.5 Hz, 1H), 7.21-7.33 (m, 5H);  $^{13}\text{C}$  NMR ( $\text{CDCl}_3$ , 126 MHz)  $\delta$  = 203.9, 137.5, 128.9, 128.6, 127.2, 83.5, 69.9, 32.5, 31.1, 25.2; HRMS-ESI ( $m/z$ ):  $[\text{M}+\text{Na}]^+$  calcd for  $\text{C}_{17}\text{H}_{14}\text{O}_2\text{SNa}$ : 245.0612. Found: 245.0605.

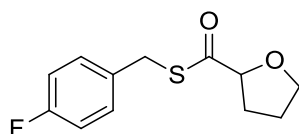

**S-4-fluorobenzyl tetrahydrofuran-2-carbothioate (3ta):** yellow oil (28.0 mg, 0.117 mmol,

47%);  $^1\text{H}$  NMR ( $\text{CDCl}_3$ , 500 MHz)  $\delta$  = 1.91 (m, 2H), 2.04 (m, 1H), 2.25 (m, 1H), 3.93 (q,  $J$  = 6.8 Hz, 1H), 4.03(s, 2H), 4.04 (m, 1H), 4.50 (dd,  $J$  = , 8.6 Hz, 1H), 6.96 (m, 2H), 7.24 (m, 2H);  $^{13}\text{C}$  NMR ( $\text{CDCl}_3$ , 126 MHz)  $\delta$  = 203.8, 161.9 (d,  $J$  = 244.0 Hz), 133.4, 130.4 (d,  $J$  = 7.9 Hz), 115.4 (d,  $J$  = 20.6 Hz), 83.5, 69.9, 31.7, 31.0, 25.2; HRMS(ESI) calcd for  $\text{C}_{12}\text{H}_{13}\text{O}_2\text{SNa}$ : 263.0518. Found: 263.0515

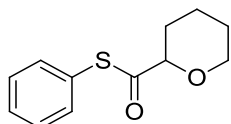

**S-Phenyl tetrahydro-2H-pyran-2-carbothioate (3ab):** yellow oil (52.1 mg, 0.234 mmol, 94%);  $^1\text{H}$  NMR ( $\text{CDCl}_3$ , 500 MHz)  $\delta$  = 1.51-1.74 (m, 4H), 1.93 (m, 1H), 2.0 (m, 1H), 3.58 (m, 1H), 4.07 (m, 1H), 4.18 (m, 1H) 7.41 (m, 5H);  $^{13}\text{C}$  NMR ( $\text{CDCl}_3$ , 126 MHz)  $\delta$  = 199.6, 134.9, 129.3, 128.1, 127.2, 82.7, 68.6, 29.2, 25.4, 22.8; HRMS-ESI ( $m/z$ ):  $[\text{M}+\text{Na}]^+$  calcd for  $\text{C}_{12}\text{H}_{14}\text{O}_2\text{SNa}$ : 245.0612. Found: 245.0606.

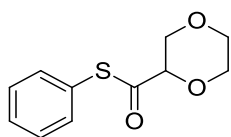

**S-Phenyl-(1,4-dioxane)-2-carbothioate (3ac):** white solid (33.6 mg, 0.150 mmol, 60%);  $^1\text{H}$  NMR ( $\text{CDCl}_3$ , 500 MHz)  $\delta$  = 3.61 (m, 3H), 3.75 (m, 1H), 3.95 (m, 2H), 4.28 (dd,  $J$  = 3.2, 9.2 Hz, 1H), 7.35 (m, 5H);  $^{13}\text{C}$  NMR ( $\text{CDCl}_3$ , 126 MHz)  $\delta$  = 196.8, 134.8, 129.6, 129.3, 126.4, 80.1, 67.9, 66.6, 66.3; HRMS-ESI ( $m/z$ ):  $[\text{M}+\text{Na}]^+$  calcd for  $\text{C}_{11}\text{H}_{12}\text{O}_3\text{SNa}$ : 247.0405. Found: 247.0398.

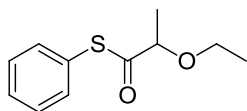

**S-Phenyl-2-ethoxypropanethioate (3ad):** yellow oil (20.9 mg, 0.099 mmol, 40%);  $^1\text{H}$  NMR ( $\text{CDCl}_3$ , 500 MHz)  $\delta$  = 1.33 (t,  $J$  = 7.0 Hz, 3H), 1.45 (t,  $J$  = 6.8 Hz, 3H) 3.63 (m, 1H), 3.77 (m, 1H), 4.03 (q,  $J$  = 6.8 Hz, 1H), 7.41 (s, 5H);  $^{13}\text{C}$  NMR ( $\text{CDCl}_3$ , 126 MHz)  $\delta$  = 202.5, 134.7, 129.2, 129.1, 127.6, 81.6, 66.8, 19.4, 15.3; HRMS-ESI ( $m/z$ ):  $[\text{M}+\text{Na}]^+$  calcd for  $\text{C}_{11}\text{H}_{14}\text{O}_2\text{SNa}$ : 233.0612. Found: 233.0607.



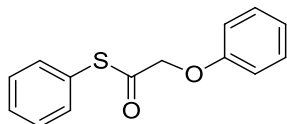

**S-Phenyl-2-phenoxyethanethioate (3ae):** yellow oil (22.4 mg, 0.092 mmol, 37%);  $^1\text{H}$  NMR ( $\text{CDCl}_3$ , 500 MHz)  $\delta$  = 4.79 (s, 2H), 7.00 (m, 2H), 7.06 (m, 1H), 7.35 (m, 2H), 7.43 (s, 5H);  $^{13}\text{C}$  NMR ( $\text{CDCl}_3$ , 126 MHz)  $\delta$  = 196.7, 157.7, 134.8, 129.7, 129.6, 129.3, 126.2, 122.2, 114.9, 72.9; HRMS-ESI ( $m/z$ ):  $[\text{M}+\text{Na}]^+$  calcd for  $\text{C}_{14}\text{H}_{12}\text{O}_2\text{SNa}$ : 267.0456. Found: 267.0451.

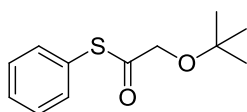

**S-phenyl 2-(tert-butoxy)ethanethioate (3af):** white solid (12.0 mg, 0.053 mmol, 21%);  $^1\text{H}$  NMR ( $\text{CDCl}_3$ , 500 MHz)  $\delta$  = 1.32 (s, 9H), 4.17 (s, 2H), 7.41 (s, 5H);  $^{13}\text{C}$  NMR ( $\text{CDCl}_3$ , 126 MHz)  $\delta$  = 199.9, 134.8, 129.2, 129.1, 127.6, 75.5, 68.3, 27.3; HRMS-ESI ( $m/z$ ):  $[\text{M}+\text{Na}]^+$  calcd for  $\text{C}_{14}\text{H}_{12}\text{O}_2\text{SNa}$ : 247.0769. Found: 247.0765.

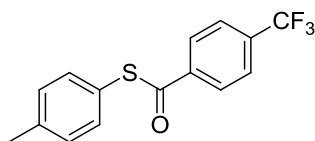

**S-p-tolyl-4-(trifluoromethyl)benzothioate (1b):**  $^1\text{H}$  NMR ( $\text{CDCl}_3$ , 500 MHz)  $\delta$  = 2.44 (s, 3H), 7.31 (d,  $J$  = 7.3 Hz, 2H), 7.44 (d,  $J$  = 7.3 Hz, 2H), 7.76 (d,  $J$  = 8.2 Hz, 2H), 8.15 (d,  $J$  = 8.2 Hz, 2H);  $^{13}\text{C}$  NMR ( $\text{CDCl}_3$ , 126 MHz)  $\delta$  = 189.6, 140.1, 139.4 (d,  $J$  = 7.3 Hz), 134.8, 134.7 (m), 130.2, 127.7, 125.8 (m), 123.0, 123.5 (q,  $J$  = 270.0 Hz), 21.2; HRMS-ESI ( $m/z$ ):  $[\text{M}+\text{Na}]^+$  calcd for  $\text{C}_{15}\text{H}_{11}\text{OF}_3\text{SNa}$ : 319.0380. Found: 319.0377.

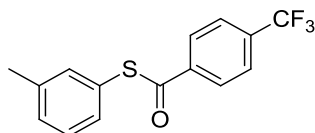

**S-m-tolyl-4-(trifluoromethyl)benzothioate (1c):**  $^1\text{H}$  NMR ( $\text{CDCl}_3$ , 500 MHz)  $\delta$  = 2.41 (s, 3H), 7.33 (m, 4H), 7.76 (d,  $J$  = 8.2 Hz, 2H), 8.13 (d,  $J$  = 8.2 Hz, 2H);  $^{13}\text{C}$  NMR ( $\text{CDCl}_3$ , 126 MHz)  $\delta$  = 189.6, 139.5, 139.3, 135.5, 134.8 (m), 132.0, 130.7, 129.2, 127.8, 126.2, 125.8 (m), 123.5 (q,  $J$  = 270.0 Hz), 21.3; HRMS-ESI ( $m/z$ ):  $[\text{M}+\text{Na}]^+$  calcd for  $\text{C}_{15}\text{H}_{11}\text{OF}_3\text{SNa}$ : 319.0380. Found: 319.0376.

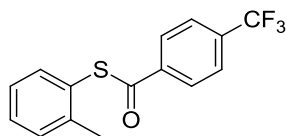

**S-*o*-tolyl-4-(trifluoromethyl)benzothioate (1d):**  $^1\text{H}$  NMR ( $\text{CDCl}_3$ , 500 MHz)  $\delta$  = 2.49 (s, 3H), 7.34 (m, 1H), 7.44 (m, 2H), 7.57 (m, 1H), 7.79 (d,  $J$  = 8.5 Hz, 2H), 8.21 (d,  $J$  = 8.5 Hz, 2H);  $^{13}\text{C}$  NMR ( $\text{CDCl}_3$ , 126 MHz)  $\delta$  = 188.6, 142.6, 139.6, 136.3, 134.7 (m), 131.0, 130.6, 127.9, 126.9, 126.2, 125.8 (m), 123.5 (q,  $J$  = 270.0 Hz), 20.7; HRMS-ESI ( $m/z$ ):  $[\text{M}+\text{Na}]^+$  calcd for  $\text{C}_{15}\text{H}_{11}\text{OF}_3\text{SNa}$ : 319.0380. Found: 319.0377.

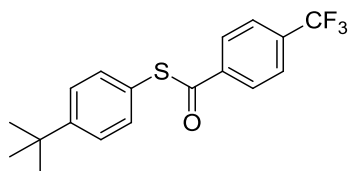

**S-(4-(*tert*-butyl)phenyl)-4-(trifluoromethyl)benzothioate (1e):**  $^1\text{H}$  NMR ( $\text{CDCl}_3$ , 500 MHz)  $\delta$  = 1.36 (s, 9H), 7.46 (m, 4H), 7.75 (d,  $J$  = 8.2 Hz, 2H), 8.13 (d,  $J$  = 8.2 Hz, 2H);  $^{13}\text{C}$  NMR ( $\text{CDCl}_3$ , 126 MHz)  $\delta$  = 189.7, 153.2, 139.5, 134.7 (m), 134.6, 127.8, 126.6, 125.8 (m), 123.5 (q,  $J$  = 270.0 Hz), 123.1, 34.8, 31.2; HRMS-ESI ( $m/z$ ):  $[\text{M}+\text{Na}]^+$  calcd for  $\text{C}_{18}\text{H}_{17}\text{OF}_3\text{SNa}$ : 361.0850. Found: 361.0846.

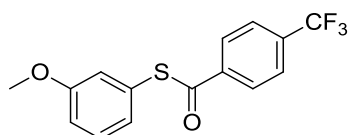

**S-(3-methoxyphenyl)-4-(trifluoromethyl)benzothioate (1f):**  $^1\text{H}$  NMR ( $\text{CDCl}_3$ , 500 MHz)  $\delta$  = 3.84 (s, 3H), 7.02 (m, 1H), 7.11 (m, 2H), 7.39 (m, 1H), 7.75 (d,  $J$  = 8.5 Hz, 2H), 8.13 (d,  $J$  = 8.2 Hz, 2H);  $^{13}\text{C}$  NMR ( $\text{CDCl}_3$ , 126 MHz)  $\delta$  = 189.2, 160.0, 139.4, 134.8 (m), 130.1, 127.8, 127.4, 127.1, 125.8 (m), 123.5 (q,  $J$  = 270.0 Hz), 120.1, 116.0, 55.4; HRMS-ESI ( $m/z$ ):  $[\text{M}+\text{Na}]^+$  calcd for  $\text{C}_{15}\text{H}_{11}\text{O}_2\text{F}_3\text{SNa}$ : 335.0330. Found: 335.0327.

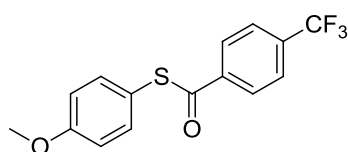

**S-(4-methoxyphenyl)-4-(trifluoromethyl)benzothioate (1g):**  $^1\text{H}$  NMR ( $\text{CDCl}_3$ , 500 MHz)  $\delta$  =

3.86 (s, 3H), 7.00 (m, 2H), 7.42 (m, 2H), 7.75 (d,  $J = 8.5$  Hz, 2H), 8.12 (d,  $J = 8.5$  Hz, 2H);  $^{13}\text{C}$  NMR ( $\text{CDCl}_3$ , 126 MHz)  $\delta = 190.3, 161.0, 139.5, 136.5, 134.8$  (m), 127.8, 125.7 (m), 123.5 (q,  $J = 270.0$  Hz), 117.0, 115.1, 55.4; HRMS-ESI ( $m/z$ ):  $[\text{M}+\text{Na}]^+$  calcd for  $\text{C}_{15}\text{H}_{11}\text{O}_2\text{F}_3\text{SNa}$ : 335.0330. Found: 335.0324.

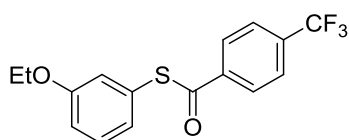

**S-(3-ethoxyphenyl)-4-(trifluoromethyl)benzothioate (1h):**  $^1\text{H}$  NMR ( $\text{CDCl}_3$ , 500 MHz)  $\delta = 1.43$  (t,  $J = 7.0$  Hz, 3H), 4.06 (q,  $J = 7.0$  Hz, 2H), 7.01 (m, 1H), 7.10 (m, 2H), 7.38 (t,  $J = 7.9$  Hz, 1H), 7.75 (d,  $J = 8.1$  Hz, 2H), 8.13 (d,  $J = 8.1$  Hz, 2H);  $^{13}\text{C}$  NMR ( $\text{CDCl}_3$ , 126 MHz)  $\delta = 189.2, 159.4, 139.5, 134.8$  (m), 130.1, 127.8, 127.4, 126.9, 125.8 (m), 123.6 (q,  $J = 270.0$  Hz), 120.6, 116.4, 63.7, 14.7; HRMS-ESI ( $m/z$ ):  $[\text{M}+\text{Na}]^+$  calcd for  $\text{C}_{16}\text{H}_{13}\text{O}_2\text{F}_3\text{SNa}$ : 349.0486. Found: 349.0483.

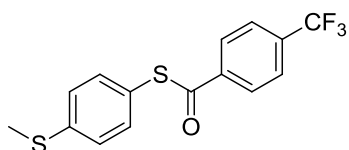

**S-(4-thiomethoxyphenyl)-4-(trifluoromethyl)benzothioate (1i):**  $^1\text{H}$  NMR ( $\text{CDCl}_3$ , 500 MHz)  $\delta = 2.50$  (s, 3H), 7.31 (m, 2H), 7.41 (m, 2H), 7.75 (d,  $J = 7.8$  Hz, 2H), 8.12 (d,  $J = 7.8$  Hz, 2H);  $^{13}\text{C}$  NMR ( $\text{CDCl}_3$ , 126 MHz)  $\delta = 189.5, 141.8, 139.4, 135.2, 134.9$  (m), 127.8, 126.6, 125.8 (m), 123.4 (q,  $J = 270.0$  Hz), 122.2 15.2; HRMS-ESI ( $m/z$ ):  $[\text{M}+\text{Na}]^+$  calcd for  $\text{C}_{15}\text{H}_{11}\text{OF}_3\text{S}_2\text{Na}$ : 351.0101. Found: 351.0095.

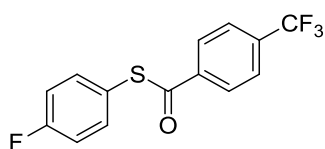

**S-(4-fluorophenyl)-4-(trifluoromethyl)benzothioate (1j):**  $^1\text{H}$  NMR ( $\text{CDCl}_3$ , 500 MHz)  $\delta = 7.17$  (m, 2H), 7.49 (m, 2H), 7.76 (d,  $J = 8.4$  Hz, 2H), 8.12 (d,  $J = 8.4$  Hz, 2H);  $^{13}\text{C}$  NMR ( $\text{CDCl}_3$ , 75 MHz)  $\delta = 189.3, 163.8$  (d,  $J = 253.0$  Hz), 139.2, 137.1, 135.0, 127.8, 125.9 (m), 123.4 (q,  $J = 270.0$  Hz), 121.8 (d,  $J = 3.5$  Hz), 116.7 (d,  $J = 21.6$  Hz); HRMS-ESI ( $m/z$ ):  $[\text{M}+\text{Na}]^+$  calcd for  $\text{C}_{14}\text{H}_8\text{OF}_4\text{SNa}$ : 323.0130. Found: 323.0125.

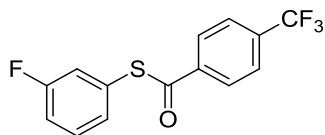

**S-(3-fluorophenyl)-4-(trifluoromethyl)benzothioate (1k):**  $^1\text{H}$  NMR ( $\text{CDCl}_3$ , 500 MHz)  $\delta$  = 7.18 (m, 1H), 7.29 (m, 2H), 7.45 (m, 1H), 7.77 (d,  $J$  = 8.5 Hz, 2H), 8.12 (d,  $J$  = 8.5 Hz, 2H);  $^{13}\text{C}$  NMR ( $\text{CDCl}_3$ , 126 MHz)  $\delta$  = 188.6, 162.5 (d,  $J$  = 261.0 Hz), 139.1, 135.1 (m), 130.6, 130.5 (d,  $J$  = 5.0 Hz), 128.3 (m), 127.8, 125.9 (m), 123.4 (q,  $J$  = 270.0 Hz), 121.9 (d,  $J$  = 21.5 Hz), 117.1 (d,  $J$  = 20.5 Hz); HRMS-ESI ( $m/z$ ):  $[\text{M}+\text{Na}]^+$  calcd for  $\text{C}_{14}\text{H}_8\text{OF}_4\text{SNa}$ : 323.0130. Found: 323.0126.

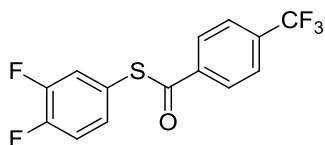

**S-(3,4-difluorophenyl)-4-(trifluoromethyl)benzothioate (1l):**  $^1\text{H}$  NMR ( $\text{CDCl}_3$ , 500 MHz)  $\delta$  = 7.26 (m, 2H), 7.38 (m, 1H), 7.77 (d,  $J$  = 8.4 Hz, 2H), 8.10 (d,  $J$  = 8.4 Hz, 2H);  $^{13}\text{C}$  NMR ( $\text{CDCl}_3$ , 126 MHz)  $\delta$  = 188.6, 152.7 (dd,  $J$  = 150.0, 11.0 Hz), 149.3 (dd,  $J$  = 150.0, 11.0 Hz), 138.9, 135.2 (m), 131.6 (m), 127.8, 125.9 (m), 124.2 (d,  $J$  = 17.0 Hz), 123.4 (q,  $J$  = 270.0 Hz), 122.7 (m), 118.2 (d,  $J$  = 16.5 Hz); HRMS-ESI ( $m/z$ ):  $[\text{M}+\text{Na}]^+$  calcd for  $\text{C}_{14}\text{H}_7\text{OF}_5\text{SNa}$ : 341.0035. Found: 341.0032.

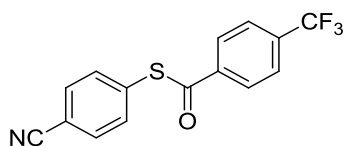

**S-(4-cyanophenyl)-4-(trifluoromethyl)benzothioate (1m):**  $^1\text{H}$  NMR ( $\text{CDCl}_3$ , 500 MHz)  $\delta$  = 7.66 (m, 2H), 7.77 (m, 4H), 8.12 (d,  $J$  = 8.4 Hz, 2H);  $^{13}\text{C}$  NMR ( $\text{CDCl}_3$ , 126 MHz)  $\delta$  = 187.5, 138.8, 135.5 (m), 135.3, 133.0, 132.7, 127.9, 126.0 (m), 123.3 (q,  $J$  = 270.0 Hz), 118.0, 113.5; HRMS-ESI ( $m/z$ ):  $[\text{M}+\text{Na}]^+$  calcd for  $\text{C}_{15}\text{H}_8\text{NOF}_3\text{SNa}$ : 330.0176. Found: 330.0174.

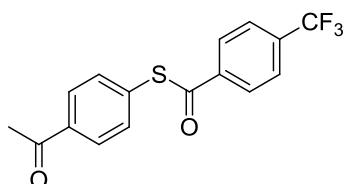

**S-(4-acetylphenyl)-4-(trifluoromethyl)benzothioate (1n):**  $^1\text{H}$  NMR ( $\text{CDCl}_3$ , 500 MHz)  $\delta$  = 2.64 (s, 3H), 7.63 (d,  $J$  = 8.5 Hz, 2H), 7.77 (d,  $J$  = 8.5 Hz, 2H), 8.04 (d,  $J$  = 8.5 Hz, 2H), 8.12 (d,  $J$  = 8.5 Hz, 2H);  $^{13}\text{C}$  NMR ( $\text{CDCl}_3$ , 126 MHz)  $\delta$  = 197.3, 188.3, 139.1, 137.8, 135.2 (m), 134.9, 132.5, 129.0, 127.9, 125.9 (m), 123.4 (q,  $J$  = 270.0 Hz), 26.7; HRMS-ESI ( $m/z$ ):  $[\text{M}+\text{Na}]^+$  calcd for

C<sub>16</sub>H<sub>11</sub>O<sub>2</sub>F<sub>3</sub>Na: 347.0330. Found: 347.0326.

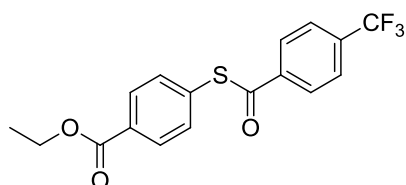

**Ethyl 4-((4-(trifluoromethyl)benzoyl)thio)benzoate (1o):** <sup>1</sup>H NMR (CDCl<sub>3</sub>, 500 MHz)  $\delta$  = 1.41 (t, *J* = 6.8 Hz, 3H), 4.41 (q, *J* = 6.8 Hz, 2H), 7.61 (d, *J* = 8.5 Hz, 2H), 7.77 (d, *J* = 8.5 Hz, 2H), 8.13 (m, 4H); <sup>13</sup>C NMR (CDCl<sub>3</sub>, 126 MHz)  $\delta$  = 188.3, 165.8, 139.2, 134.9 (m), 134.6, 132.1, 131.6, 130.3, 127.9, 125.9 (m), 123.4 (q, *J* = 270.0 Hz), 61.3, 14.3; HRMS-ESI (*m/z*): [M+Na]<sup>+</sup> calcd for C<sub>17</sub>H<sub>13</sub>O<sub>3</sub>F<sub>3</sub>Na: 377.0435. Found: 377.0433.

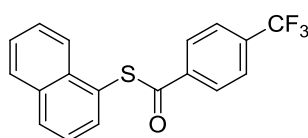

**S-naphthalen-1-yl-4-(trifluoromethyl)benzothioate (1p):** <sup>1</sup>H NMR (CDCl<sub>3</sub>, 500 MHz)  $\delta$  = 7.57 (m, 3H), 7.80 (t, *J* = 6.5 Hz, 3H), 7.94 (m, 1H), 8.02 (d, *J* = 8.5 Hz, 1H), 8.21 (m, 3H); <sup>13</sup>C NMR (CDCl<sub>3</sub>, 126 MHz)  $\delta$  = 188.9, 139.4, 135.5, 135.1 (m), 134.4, 134.3, 131.4, 128.8, 128.0, 127.4, 126.6, 125.8 (m), 125.7, 125.1, 124.0, 123.5 (q, *J* = 270.0 Hz); HRMS-ESI (*m/z*): [M+Na]<sup>+</sup> calcd for C<sub>18</sub>H<sub>11</sub>OF<sub>3</sub>Na: 355.0380. Found: 355.0374.

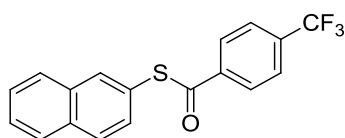

**S-naphthalen-2-yl-4-(trifluoromethyl)benzothioate (1q):** <sup>1</sup>H NMR (CDCl<sub>3</sub>, 500 MHz)  $\delta$  = 7.57 (m, 3H), 7.77 (d, *J* = 8.5 Hz, 2H), 7.89 (m, 2H), 7.95 (d, *J* = 8.5 Hz, 1H), 8.08 (s, 1H), 8.17 (d, *J* = 8.5 Hz, 2H); <sup>13</sup>C NMR (CDCl<sub>3</sub>, 126 MHz)  $\delta$  = 189.5, 139.5, 135.0, 134.5 (m), 133.6, 133.5, 131.1, 129.1, 128.0, 127.9, 127.8, 127.4, 126.7, 125.8 (m), 123.9, 123.5 (d, *J* = 270.0 Hz); HRMS-ESI (*m/z*): [M+Na]<sup>+</sup> calcd for C<sub>18</sub>H<sub>11</sub>OF<sub>3</sub>Na: 355.0380. Found: 355.0376.

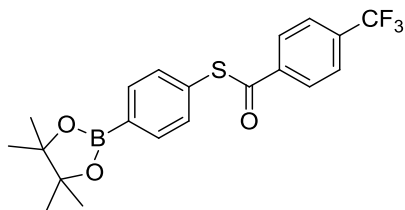

**S-(4-(4,4,5,5-tetramethyl-1,3,2-dioxaborolan-2-yl)phenyl)-4-(trifluoromethyl)benzothioate (1r):**  $^1\text{H}$  NMR ( $\text{CDCl}_3$ , 500 MHz)  $\delta$  = 1.37 (s, 12H), 7.53 (d,  $J$  = 8.1 Hz, 2H), 7.75 (d,  $J$  = 8.5 Hz, 2H), 7.92 (d,  $J$  = 8.1 Hz, 2H), 8.12 (d,  $J$  = 8.5 Hz, 2H);  $^{13}\text{C}$  NMR ( $\text{CDCl}_3$ , 126 MHz)  $\delta$  = 188.9, 139.5, 135.6, 134.9 (m), 134.0, 129.8, 127.8, 125.8 (m), 123.5 (q,  $J$  = 270 Hz), 84.1, 24.8; HRMS-ESI ( $m/z$ ):  $[\text{M}+\text{Na}]^+$  calcd for  $\text{C}_{22}\text{H}_{24}\text{BOF}_3\text{SNa}$ : 431.1076. Found: 431.1082.

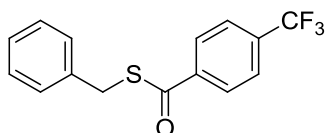

**S-benzyl-4-(trifluoromethyl)benzothioate (1s):**  $^1\text{H}$  NMR ( $\text{CDCl}_3$ , 500 MHz)  $\delta$  = 4.37 (s, 2H), 7.29 (m, 1H), 7.35 (m, 2H), 7.41 (m, 2H), 7.76 (d,  $J$  = 8.2 Hz, 2H), 8.13 (d,  $J$  = 8.2 Hz, 2H);  $^{13}\text{C}$  NMR ( $\text{CDCl}_3$ , 126 MHz)  $\delta$  = 190.3, 139.6, 137.0, 134.6 (m), 129.1, 128.8, 127.7, 127.6, 125.7 (m), 123.5 (q,  $J$  = 270.0 Hz), 33.6; HRMS-ESI ( $m/z$ ):  $[\text{M}+\text{Na}]^+$  calcd for  $\text{C}_{15}\text{H}_{11}\text{OF}_3\text{SNa}$ : 319.0380. Found: 319.0376.

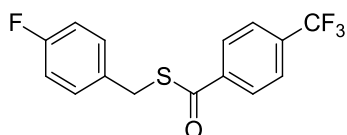

**S-(4-fluorobenzyl)-4-(trifluoromethyl)benzothioate (1t):**  $^1\text{H}$  NMR ( $\text{CDCl}_3$ , 500 MHz)  $\delta$  = 4.32 (s, 2H), 7.01 (t,  $J$  = 8.3 Hz, 2H), 7.35 (m, 2H), 7.71 (d,  $J$  = 8.2 Hz, 2H), 8.06 (d,  $J$  = 8.2 Hz, 2H);  $^{13}\text{C}$  NMR ( $\text{CDCl}_3$ , 126 MHz)  $\delta$  = 190.2, 162.2 (d,  $J$  = 240.0 Hz), 139.4, 134.8 (m), 132.8 (d,  $J$  = 3.1 Hz), 130.6 (d,  $J$  = 7.9 Hz), 127.6, 125.7 (m), 123.4 (q,  $J$  = 270.0 Hz), 115.6 (d), 32.8; HRMS-ESI ( $m/z$ ):  $[\text{M}+\text{Na}]^+$  calcd for  $\text{C}_{15}\text{H}_{10}\text{OF}_4\text{SNa}$ : 337.0286. Found: 337.0280.

## II. References

1. M. S. Lowry, J. I. Goldsmith, J. D. Slinker, R. Rohl, R. A. Pascal, G. G. Malliaras and S. Bernhard, *Chem. Mater.*, 2005, **17**, 5712.
2. D. L. Holmes and D. A. Lightner, *Tetrahedron*, 1995, **51**, 1607.
3. Y. J. Liu, J. Kim, H. Seo, S. Park and J. Chae, *Adv. Synth. Catal.*, 2015, **357**, 2205.
4. R. A. Aitken, M. J. Drysdale and B. M. Ryan, *J. Chem. Soc., Perkin Trans. 1*, 1998, 3345.
5. C. A. Laskowski and G. L. Hillhouse, *Organometallics*, 2009, **28**, 6114.
6. B. R. Dible, M. S. Sigman and A. M. Arif, *Inorg. Chem.*, 2005, **44**, 3774.
7. C. H. He, X. W. Qian and P. P. Sun, *Org. Biomol. Chem.*, 2014, **12**, 6072.
8. Y. Lin, M. Z. Cai, Z. G. Fang and H. Zhao, *Tetrahedron*, 2016, **72**, 3335.
9. E. A. Jo and C. H. Jun, *Eur. J. Org. Chem.*, 2006, 2504.
10. A. G. M. Barrett, J. A. Flygare and C. D. Spilling, *J. Org. Chem.*, 1989, **54**, 4723.

### III. $^1\text{H}$ and $^{13}\text{C}$ NMR spectra

#### $^1\text{H}$ NMR (3aa)

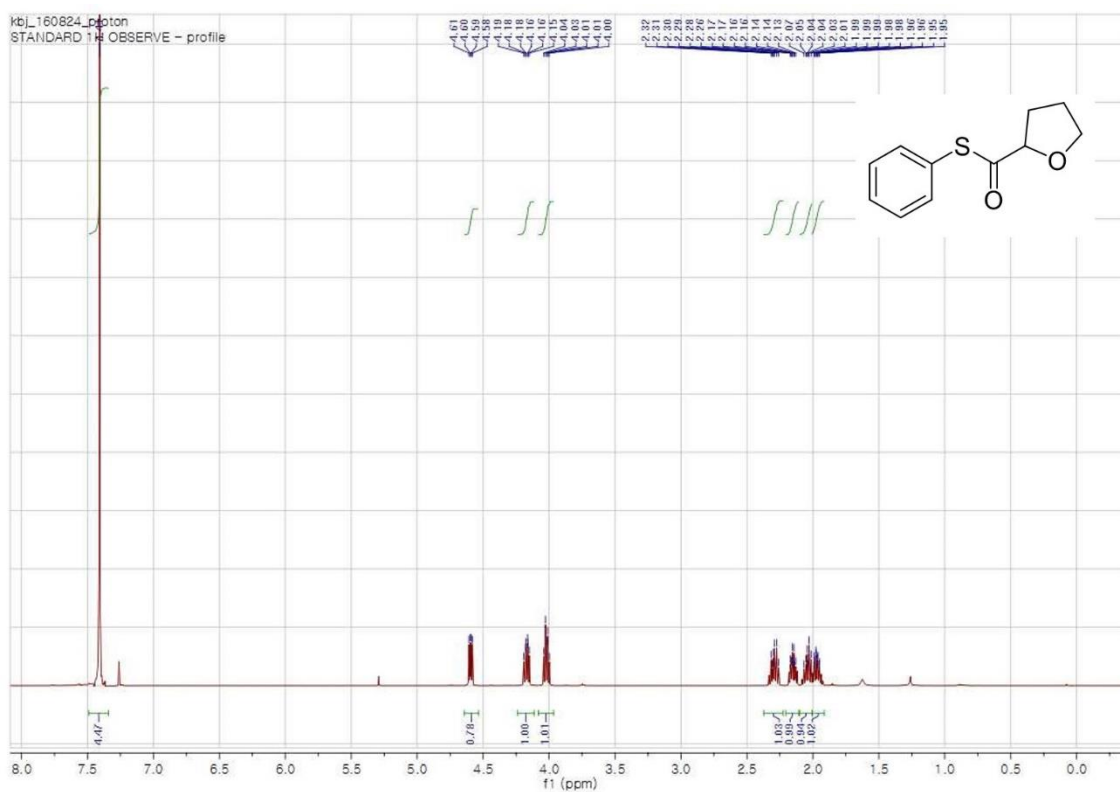

#### $^{13}\text{C}$ NMR (3aa)

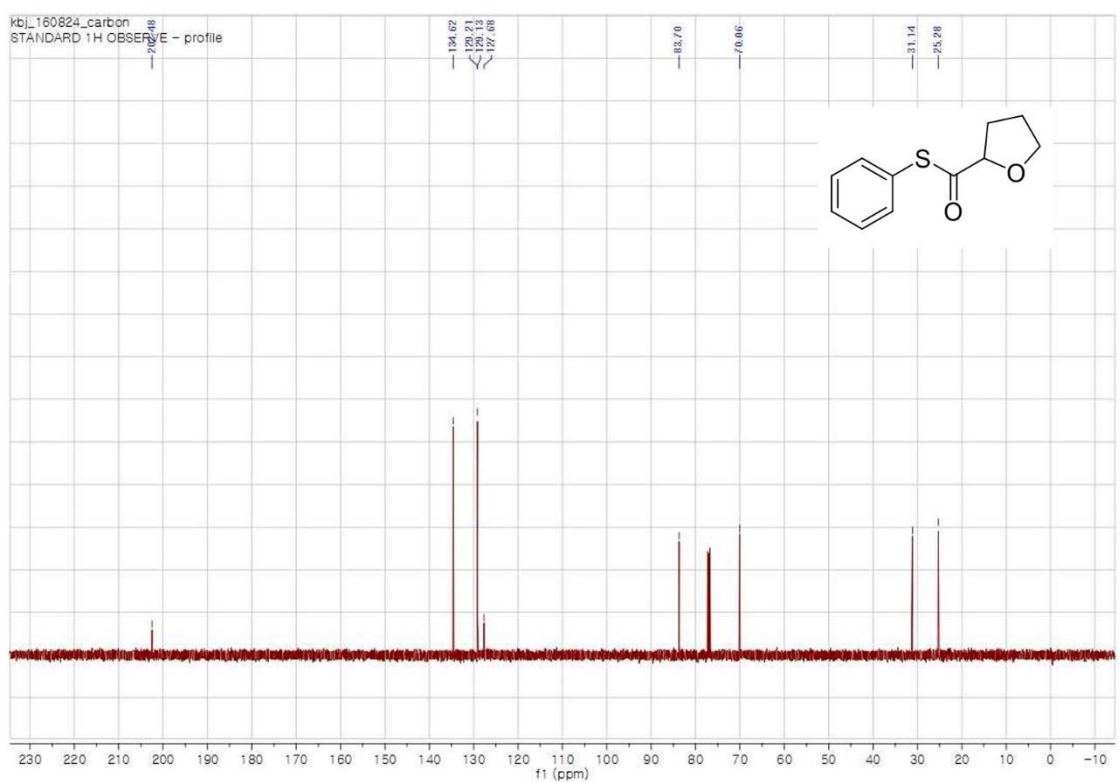



### <sup>1</sup>H NMR (3ba)

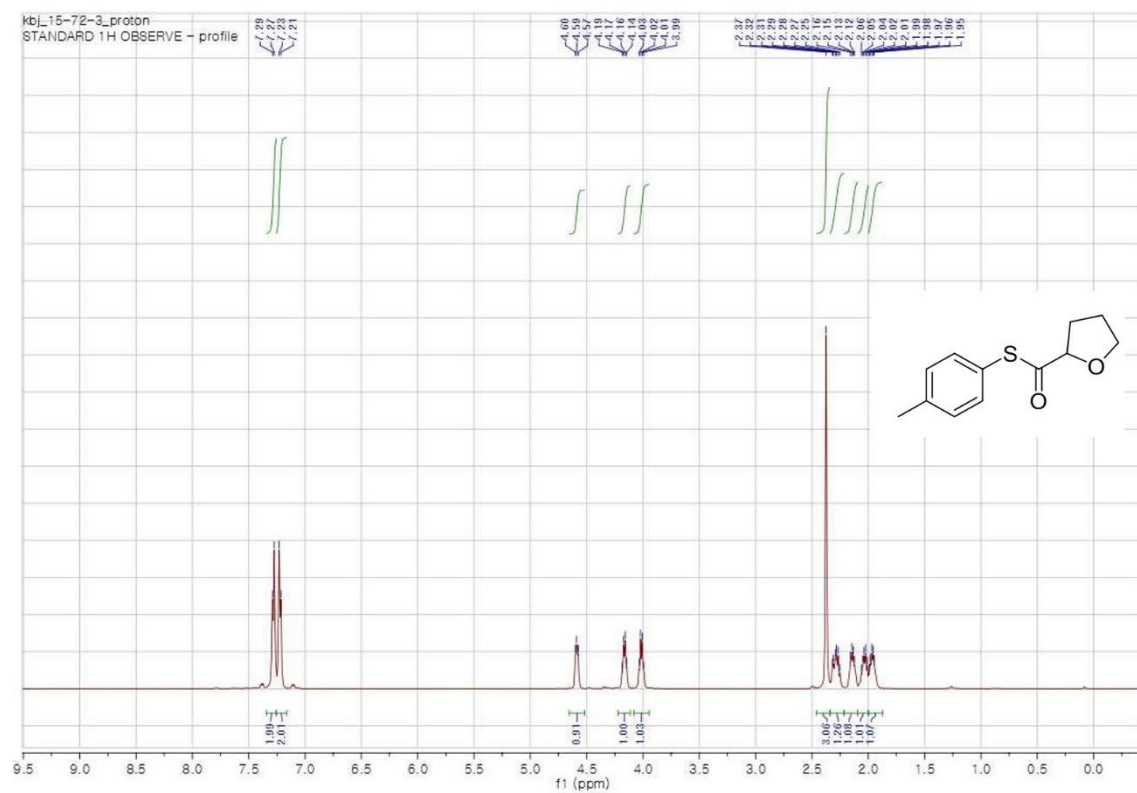

### <sup>13</sup>C NMR (3ba)

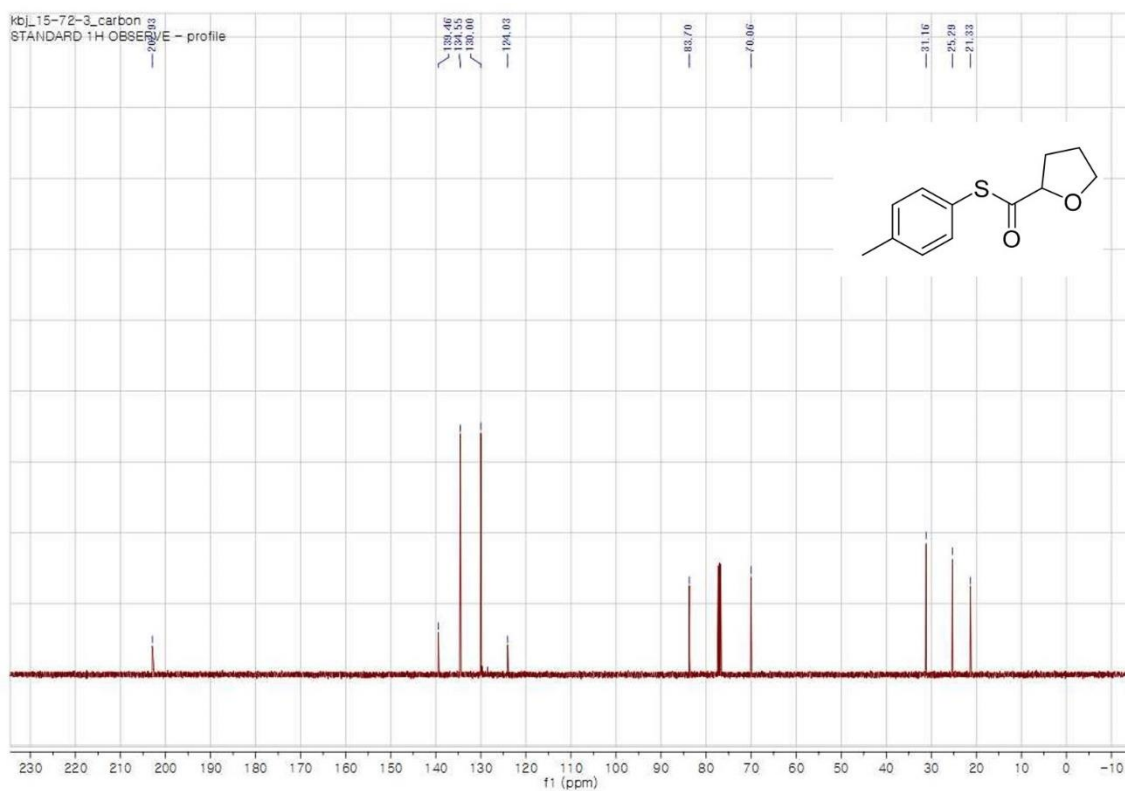

### <sup>1</sup>H NMR (3ca)

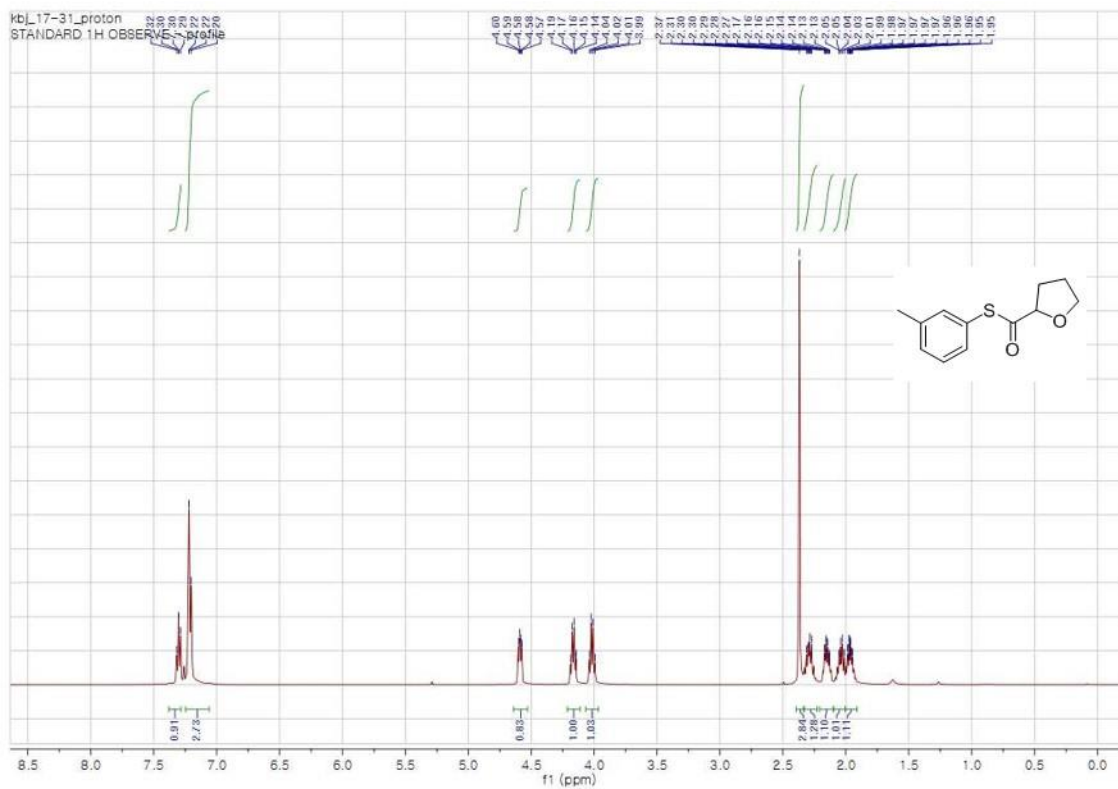

### <sup>13</sup>C NMR (3ca)

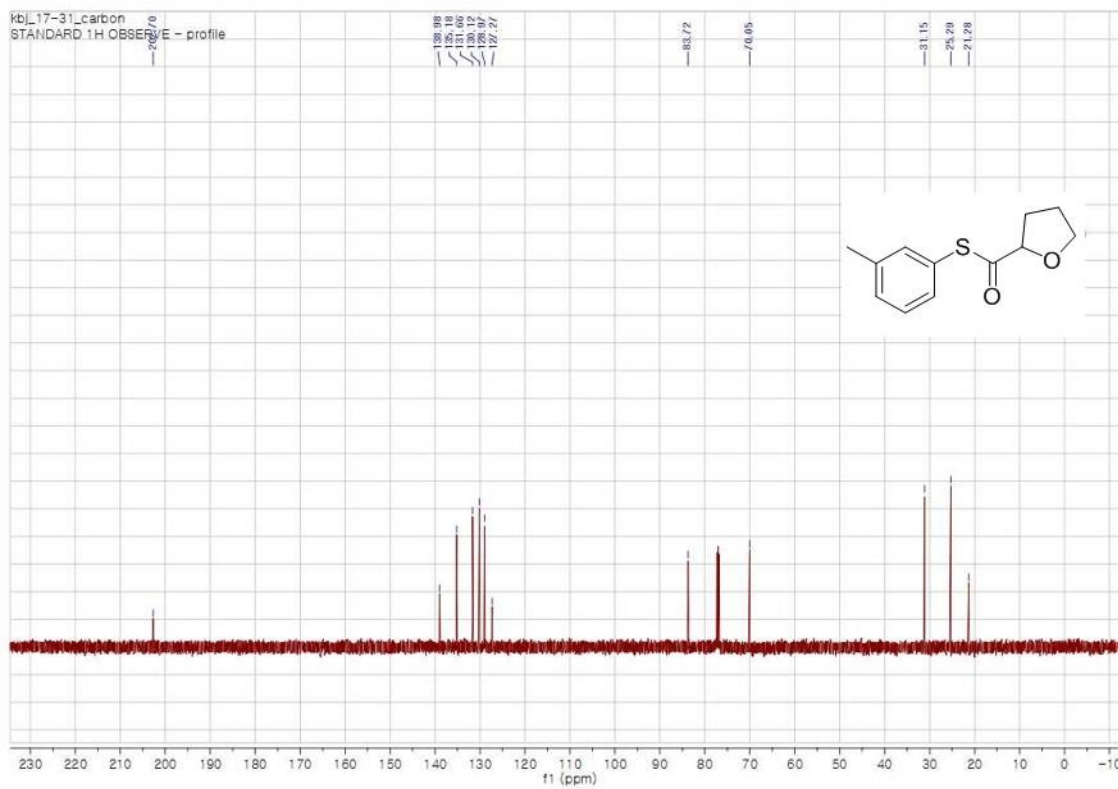

### <sup>1</sup>H NMR (3da)

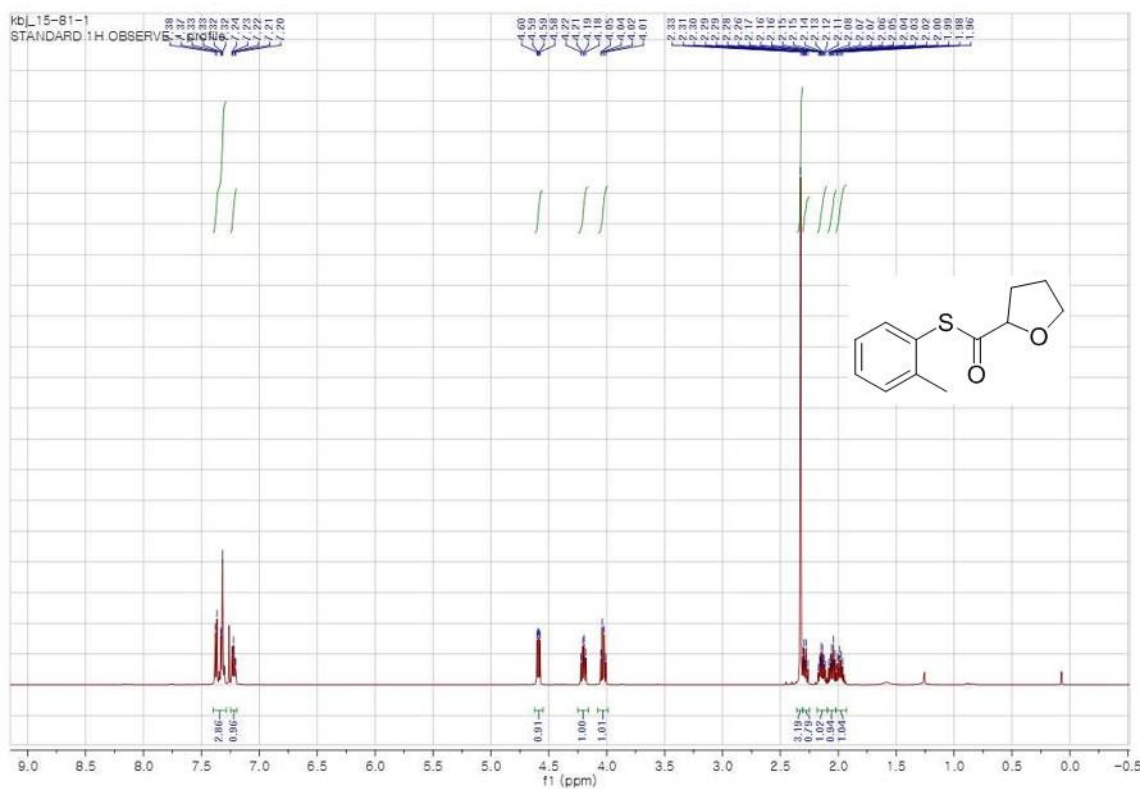

### <sup>13</sup>C NMR (3da)

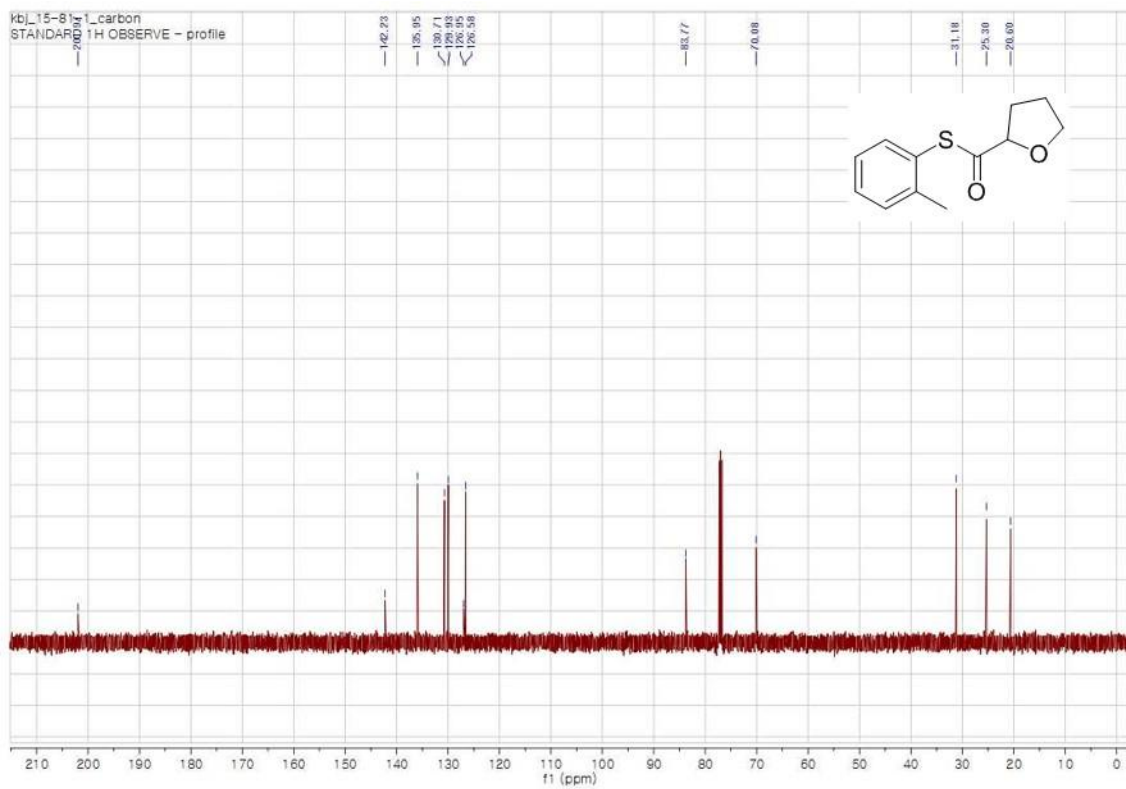

### <sup>1</sup>H NMR (3ea)

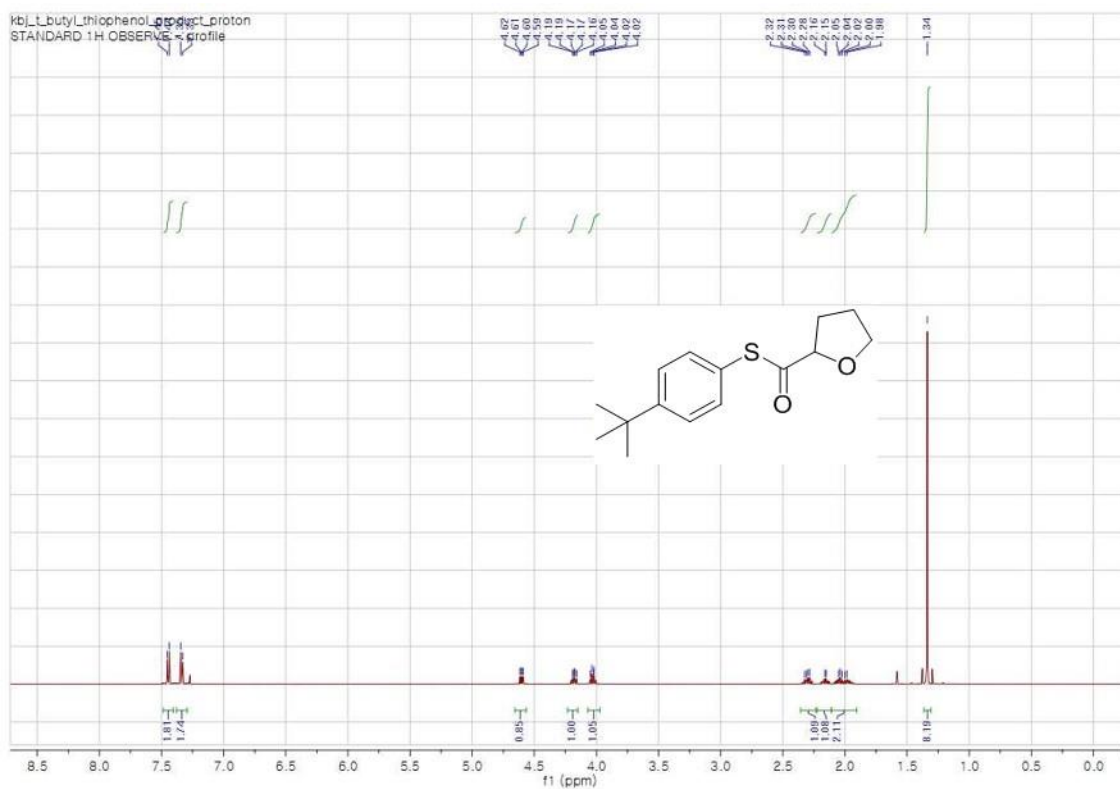

### <sup>13</sup>C NMR (3ea)

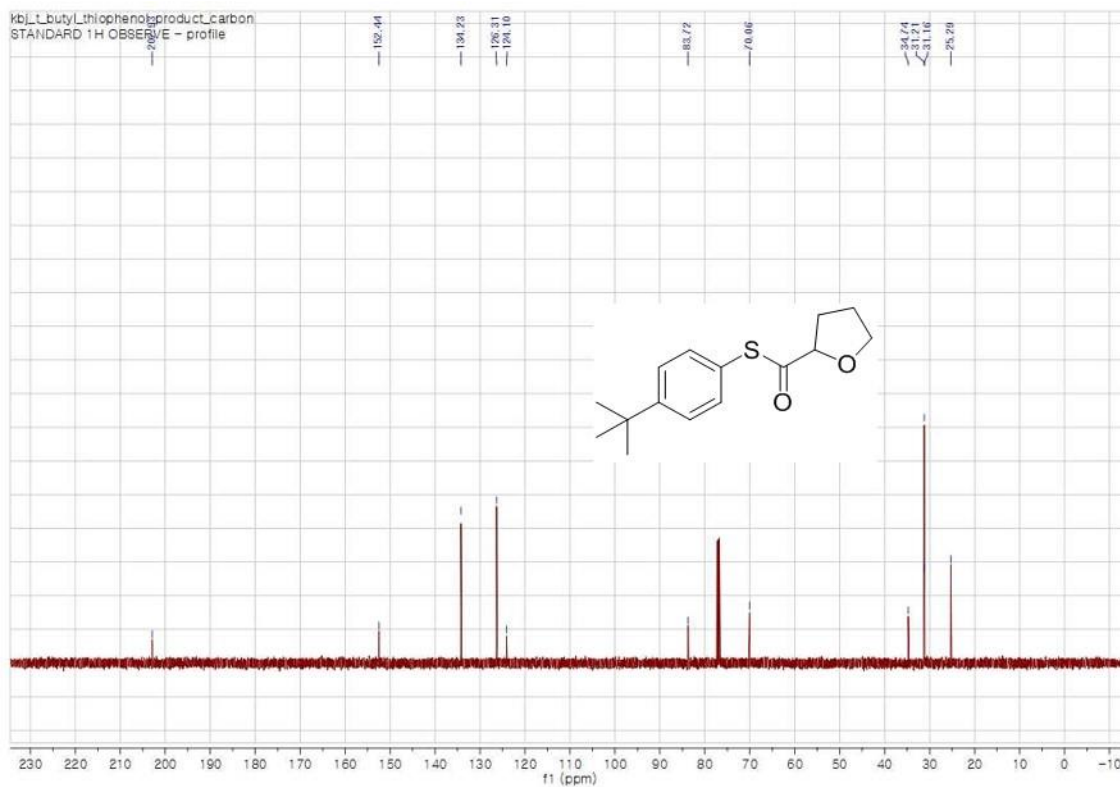

### <sup>1</sup>H NMR (3fa)

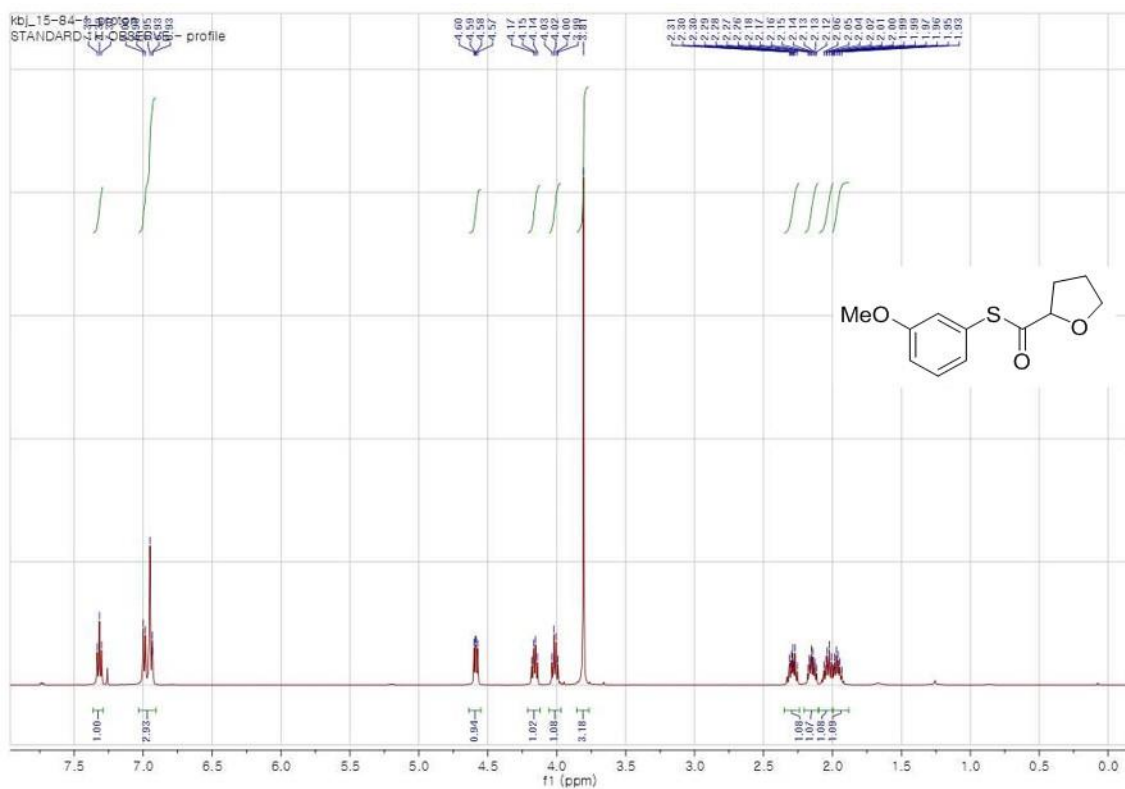

### <sup>13</sup>C NMR (3fa)

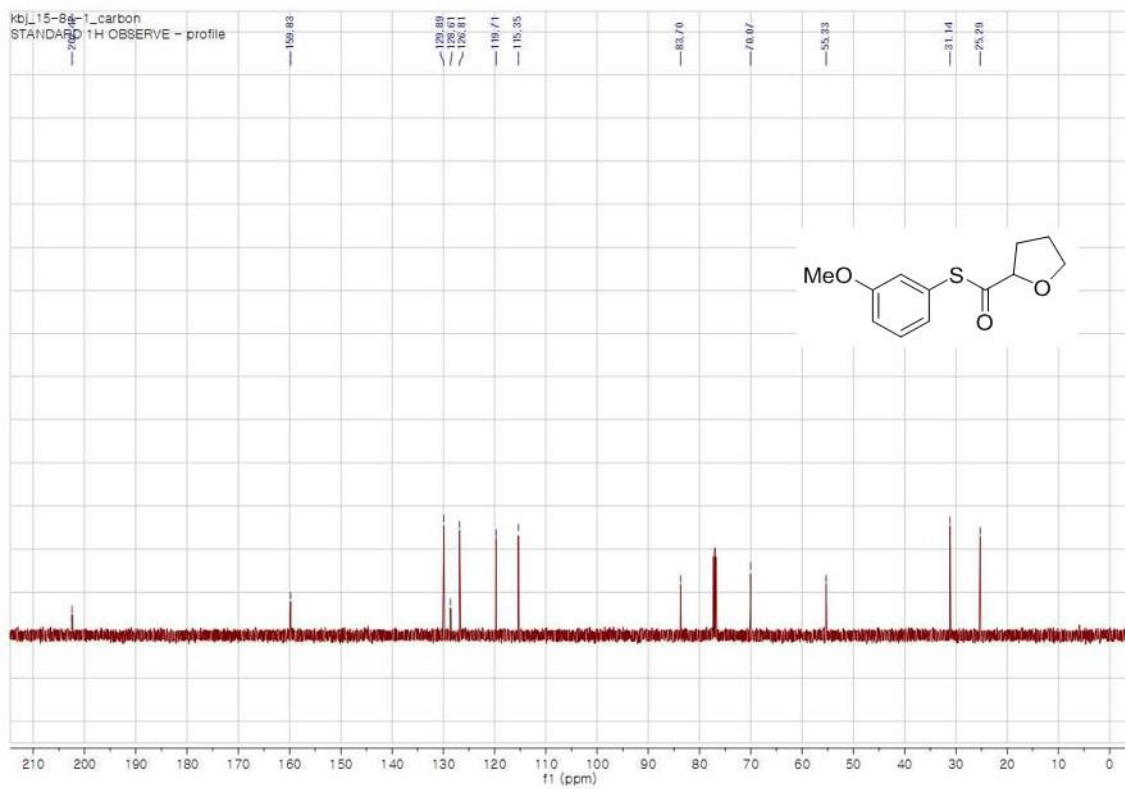

# <sup>1</sup>H NMR (3ga)

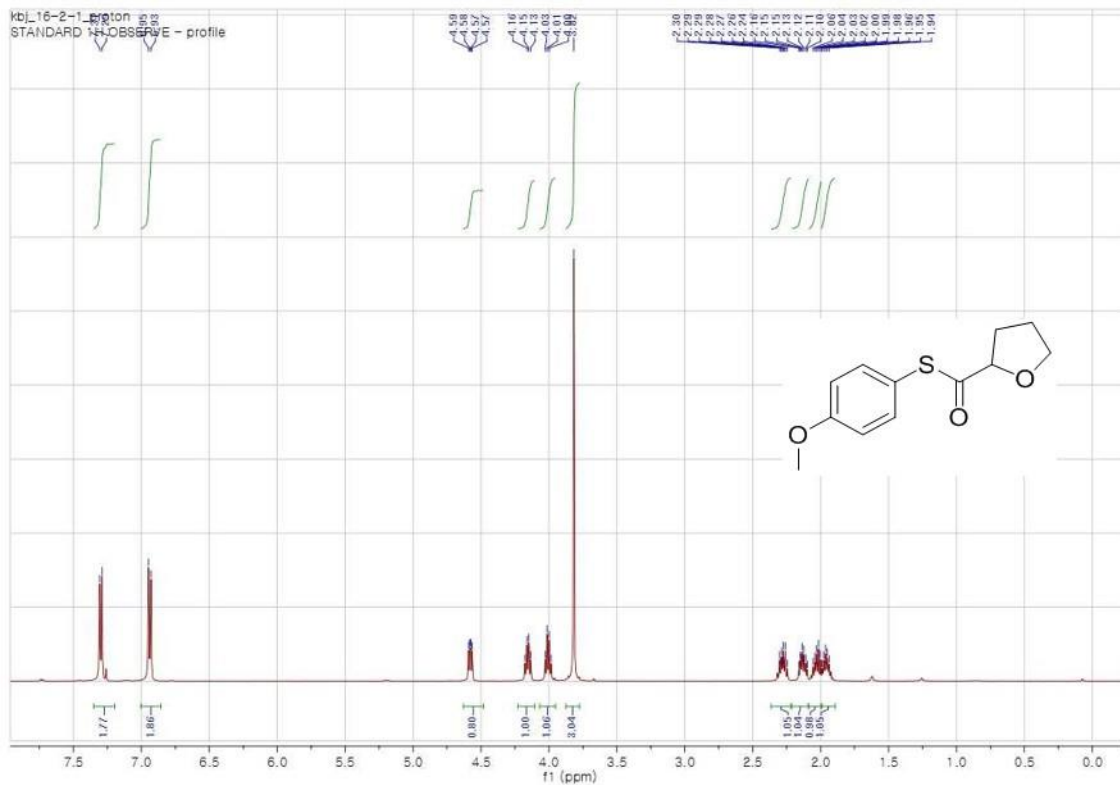

# <sup>13</sup>C NMR (3ga)

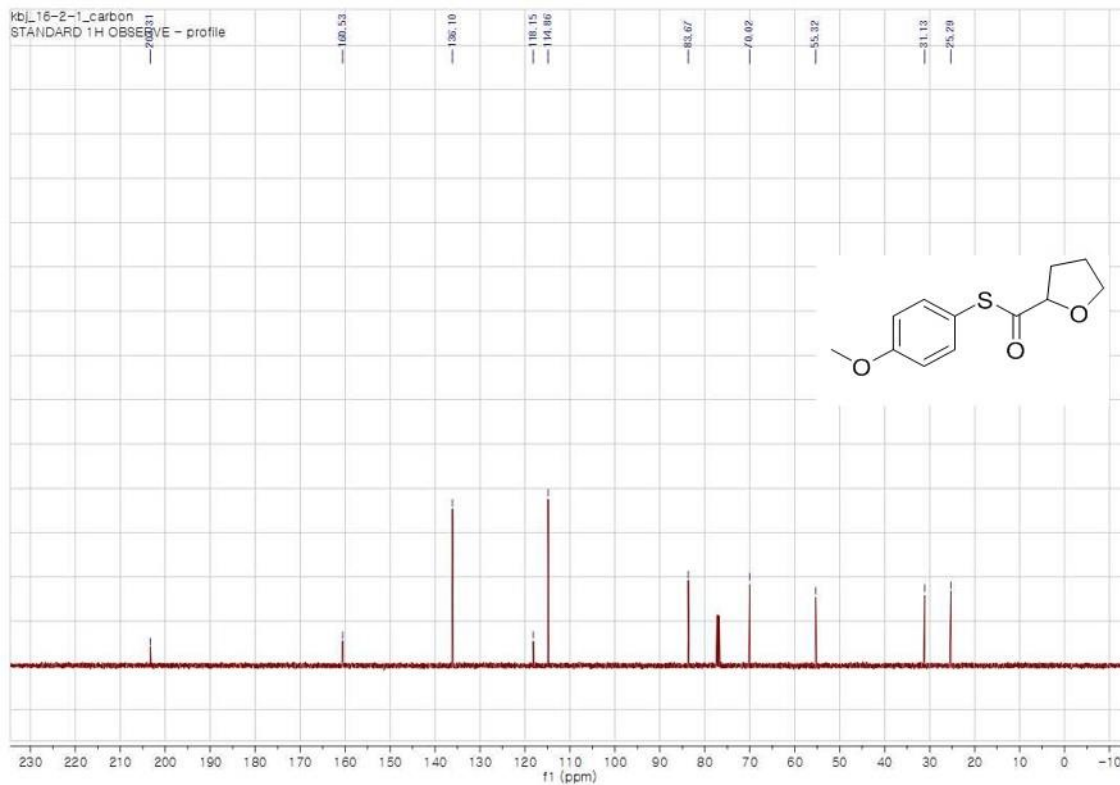

### <sup>1</sup>H NMR (3ha)

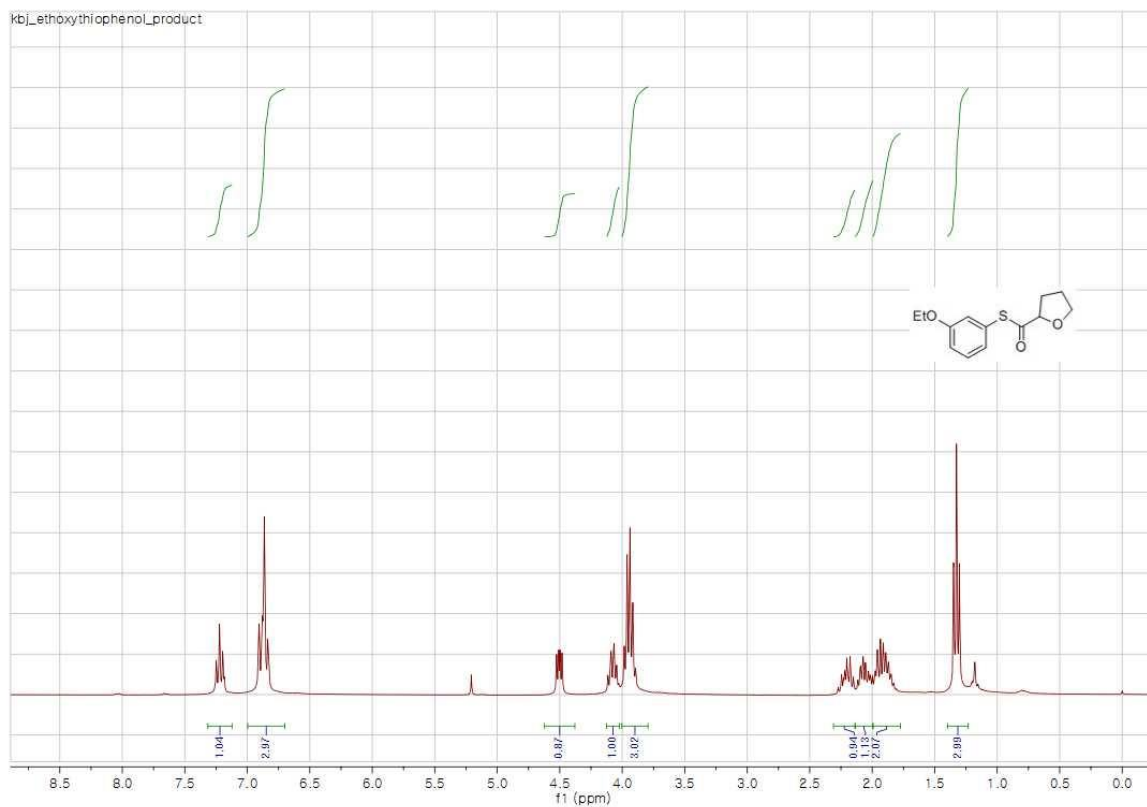

### <sup>13</sup>C NMR (3ha)

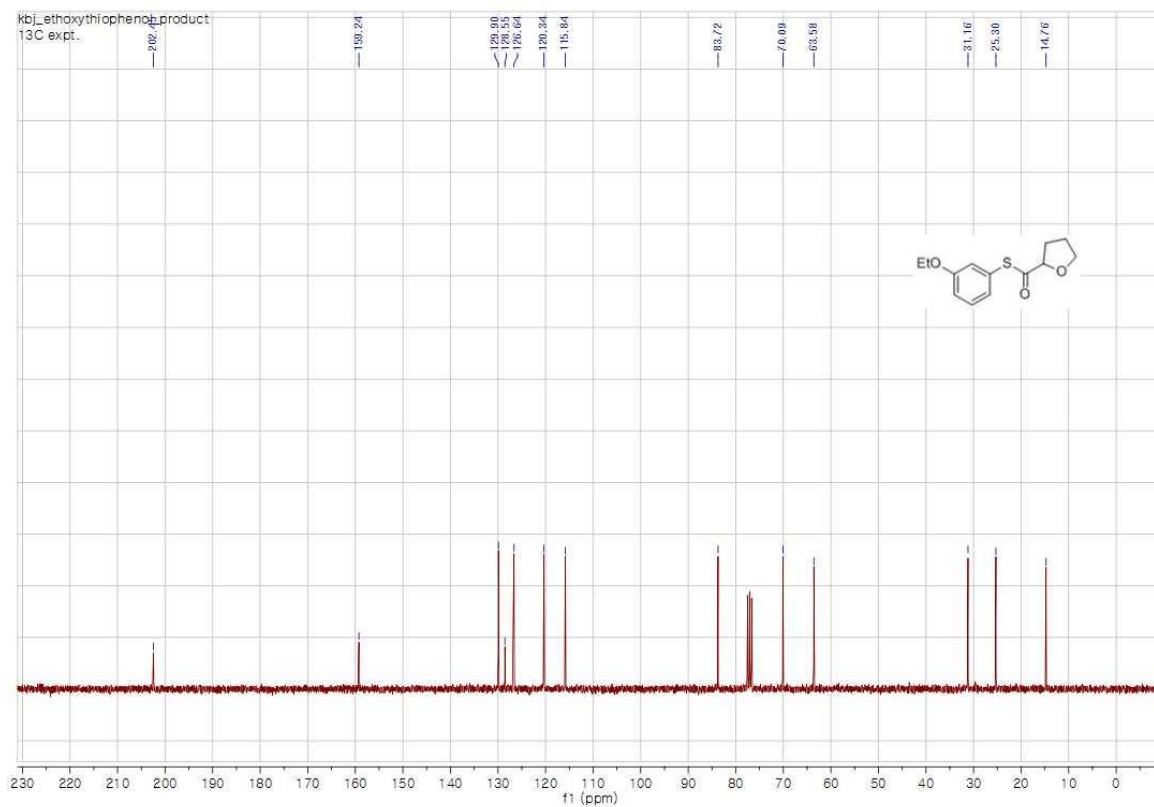



### <sup>1</sup>H NMR (3ia)

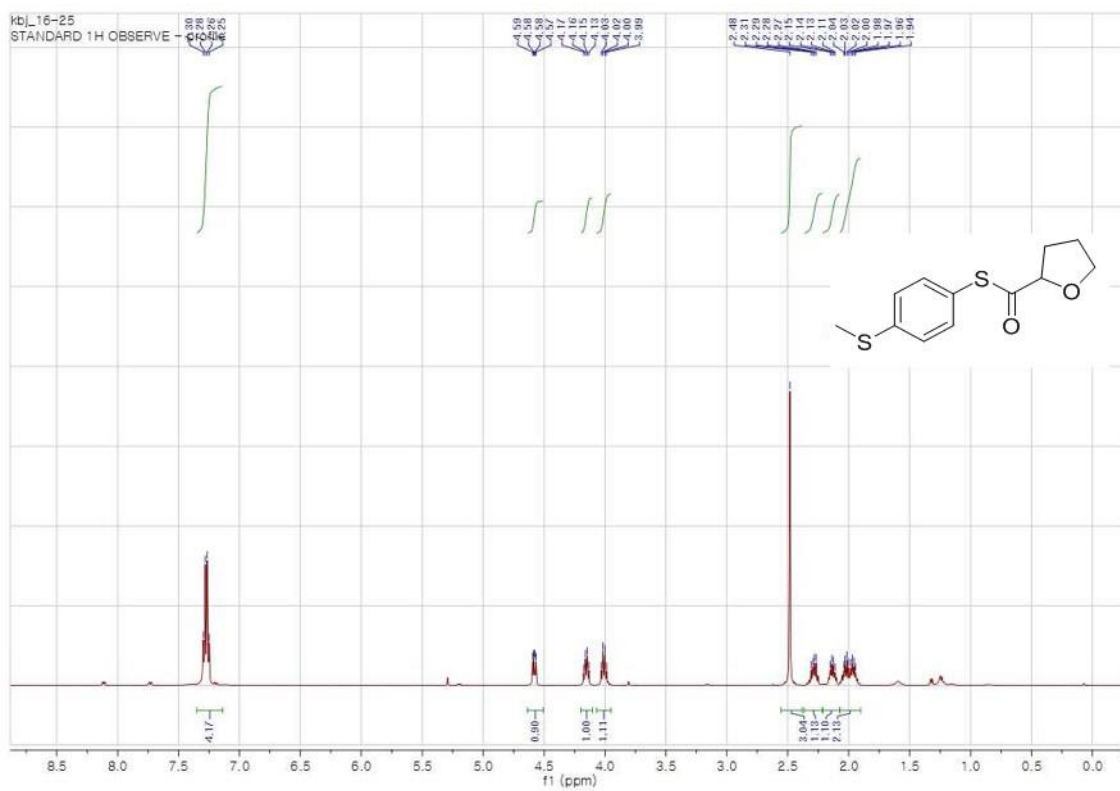

### <sup>13</sup>C NMR (3ia)

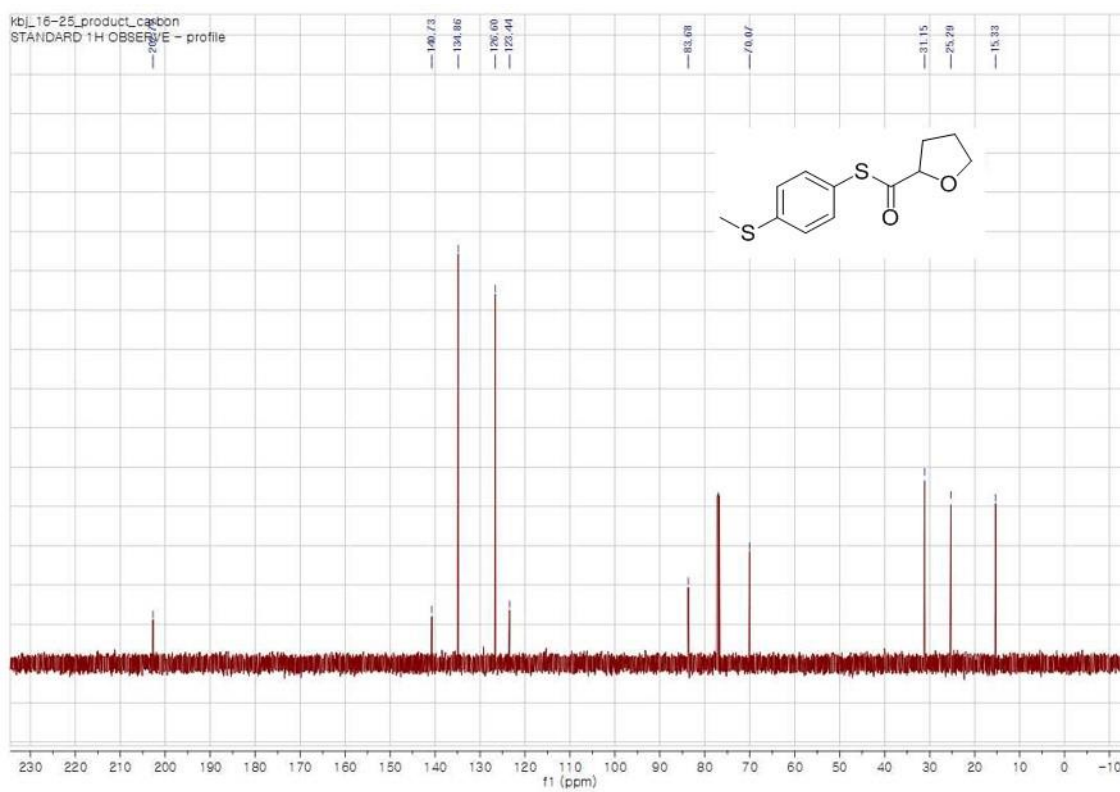



### <sup>1</sup>H NMR (3ja)

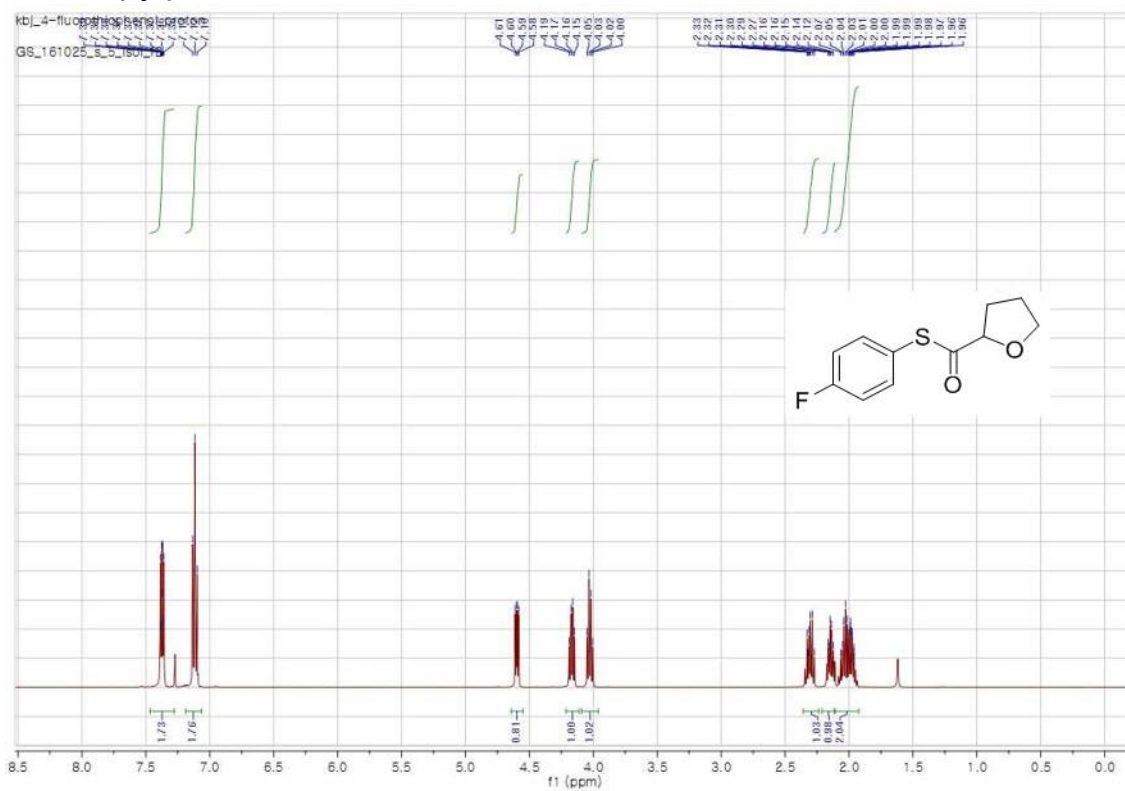

### <sup>13</sup>C NMR (3ja)

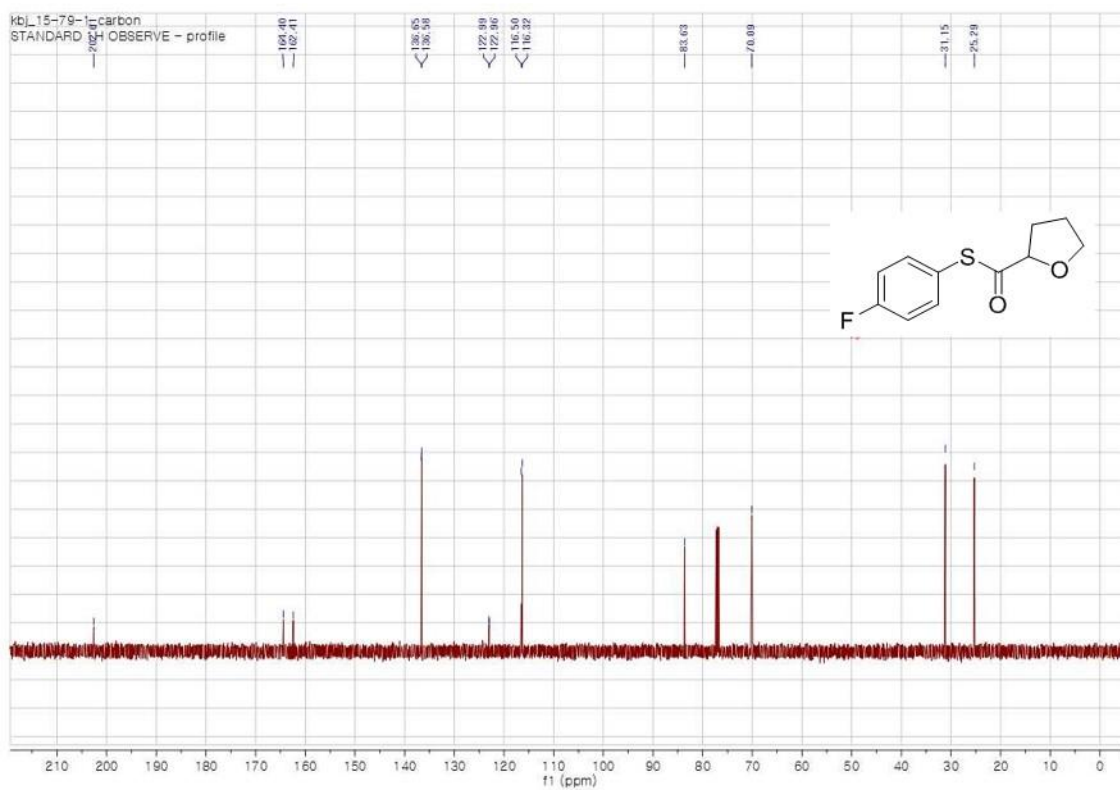

### <sup>1</sup>H NMR (3ka)

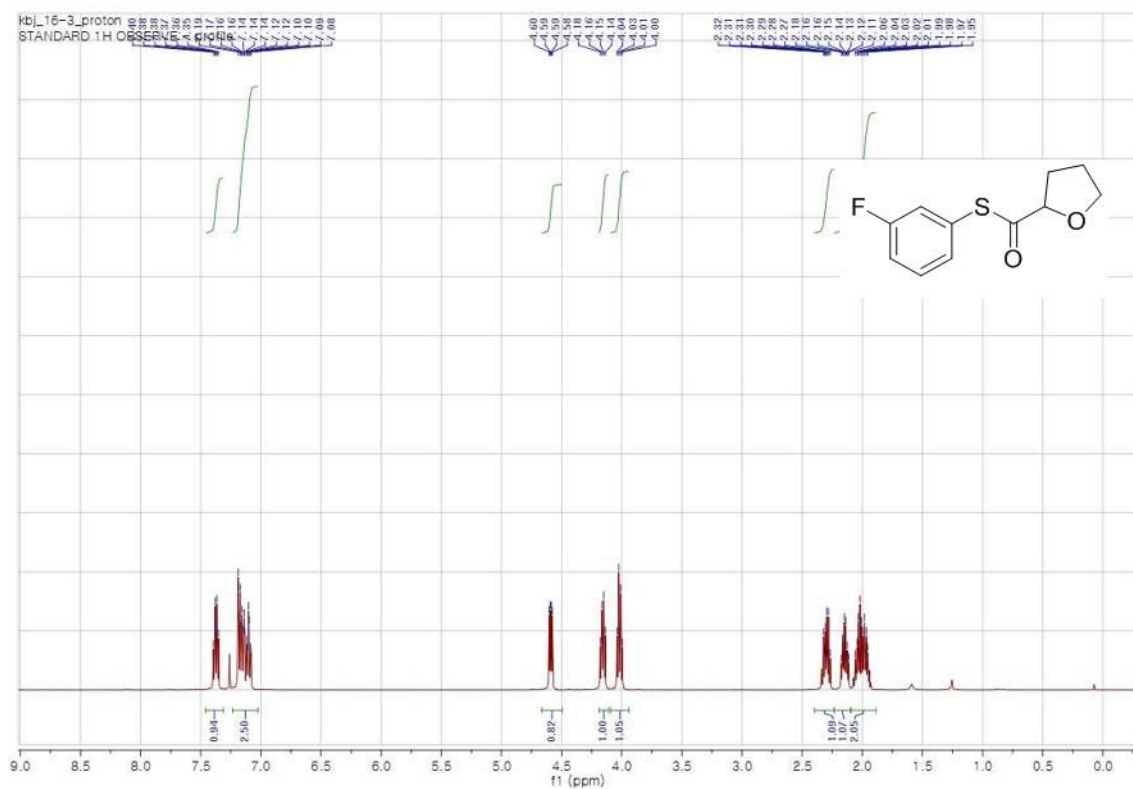

### <sup>13</sup>C NMR (3ka)

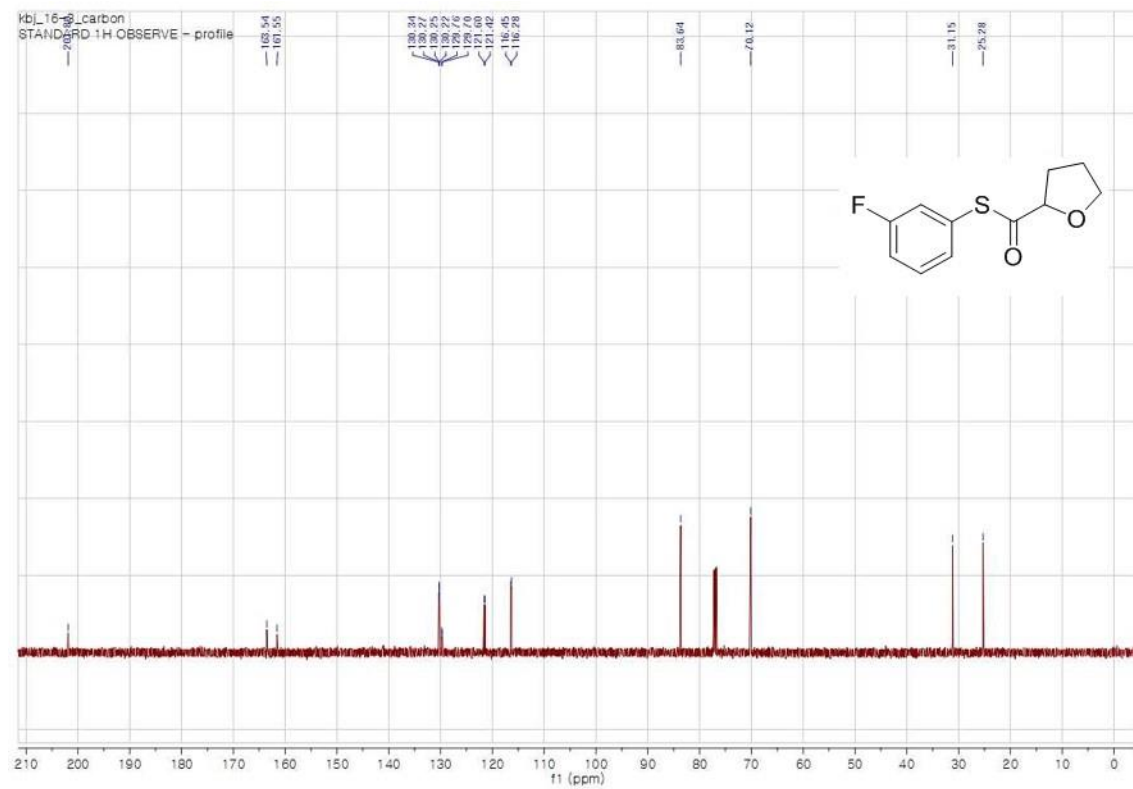

### <sup>1</sup>H NMR (3la)

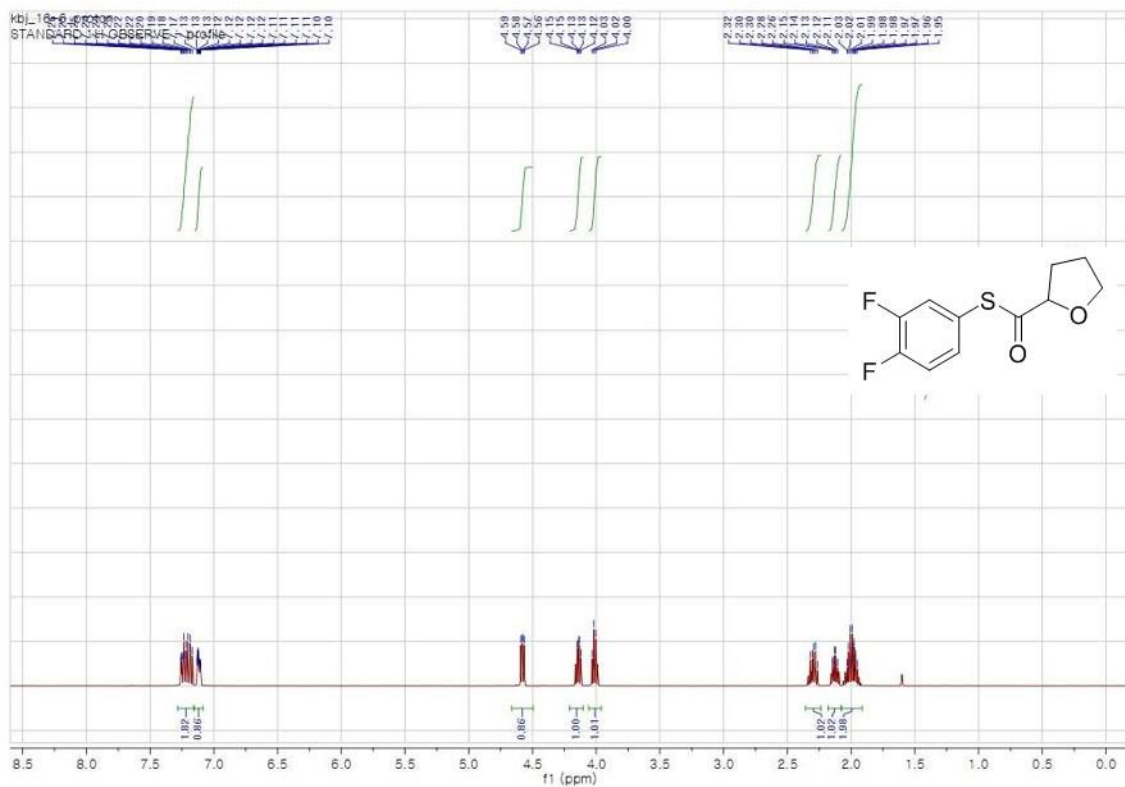

### <sup>13</sup>C NMR (3la)

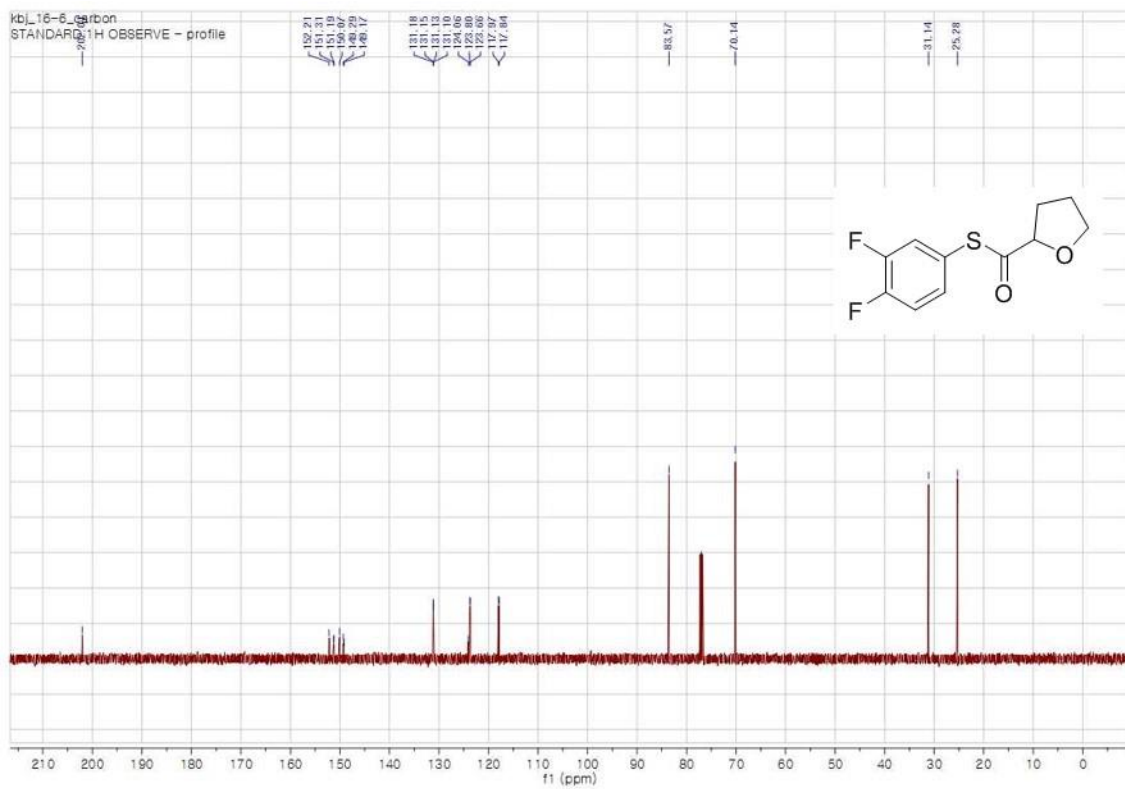

### <sup>1</sup>H NMR (3ma)

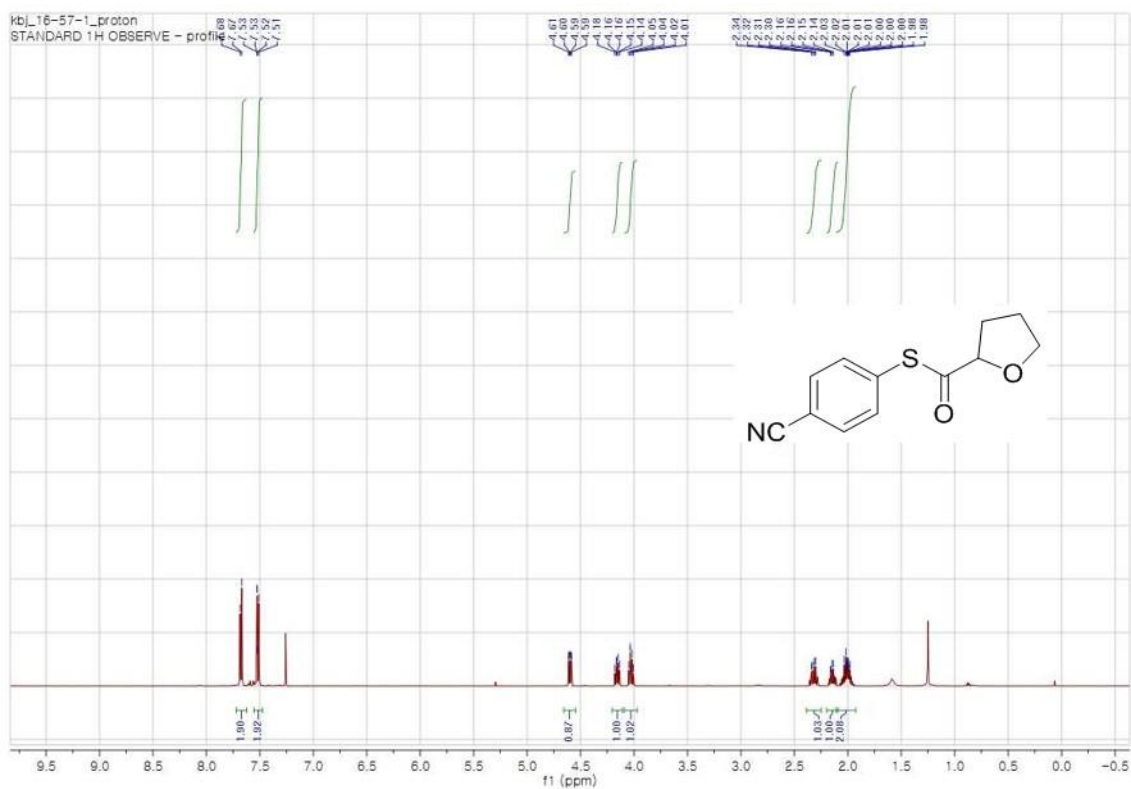

### <sup>13</sup>C NMR (3ma)

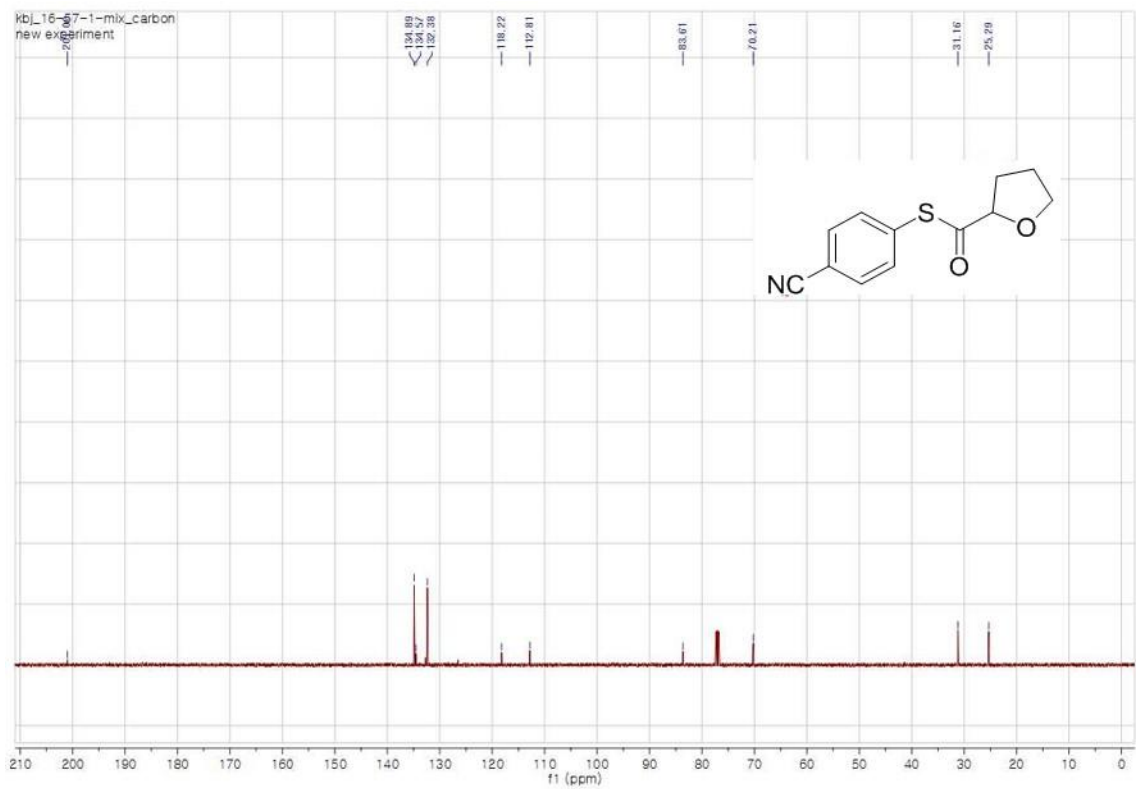

### <sup>1</sup>H NMR (3na)

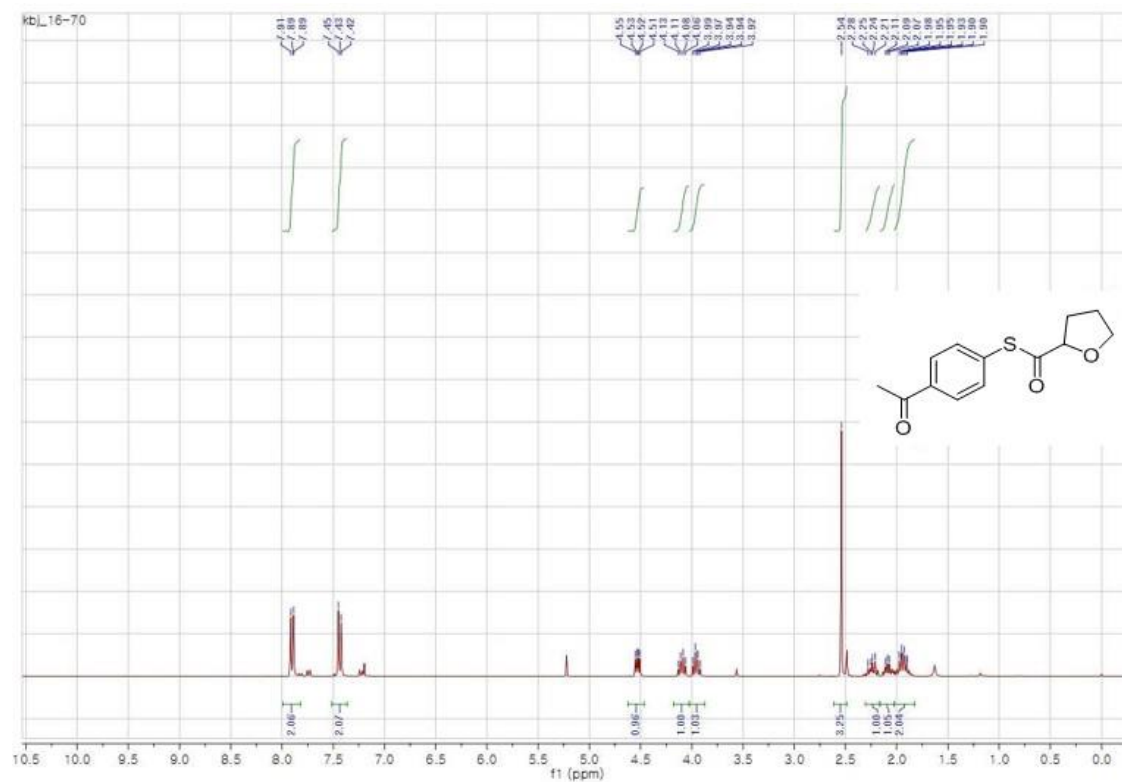

### <sup>13</sup>C NMR (3na)

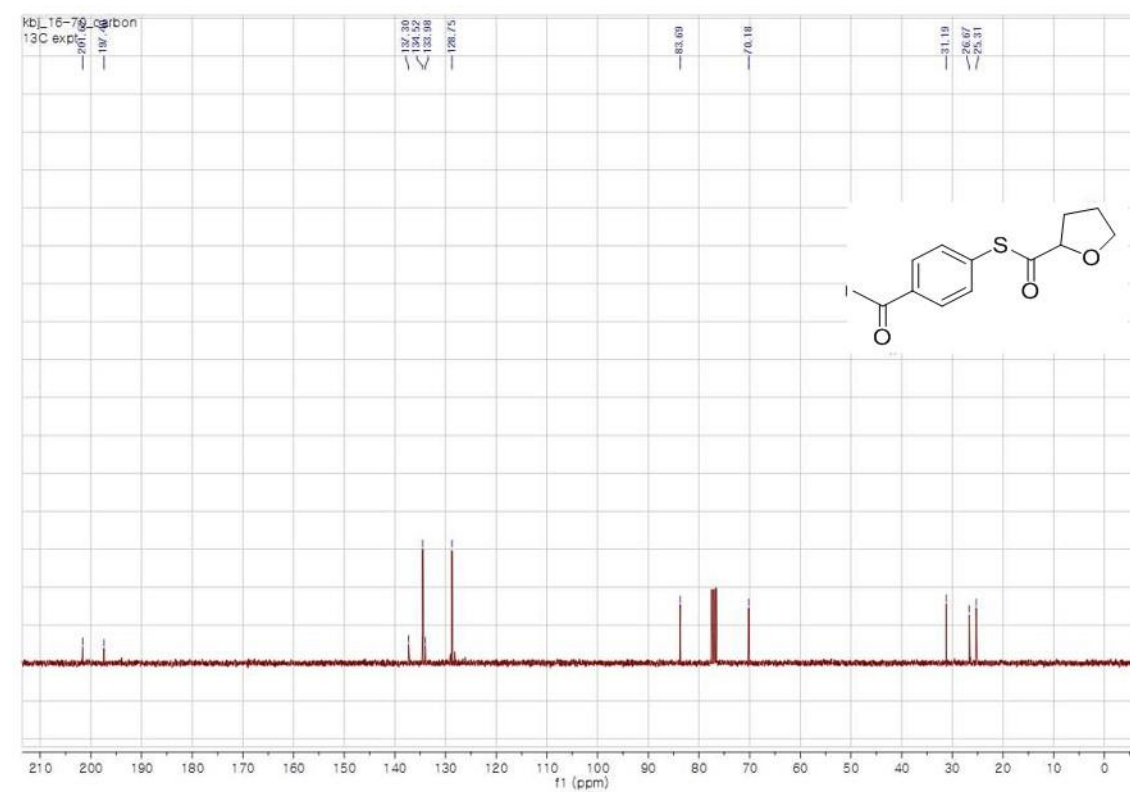

### <sup>1</sup>H NMR (30a)

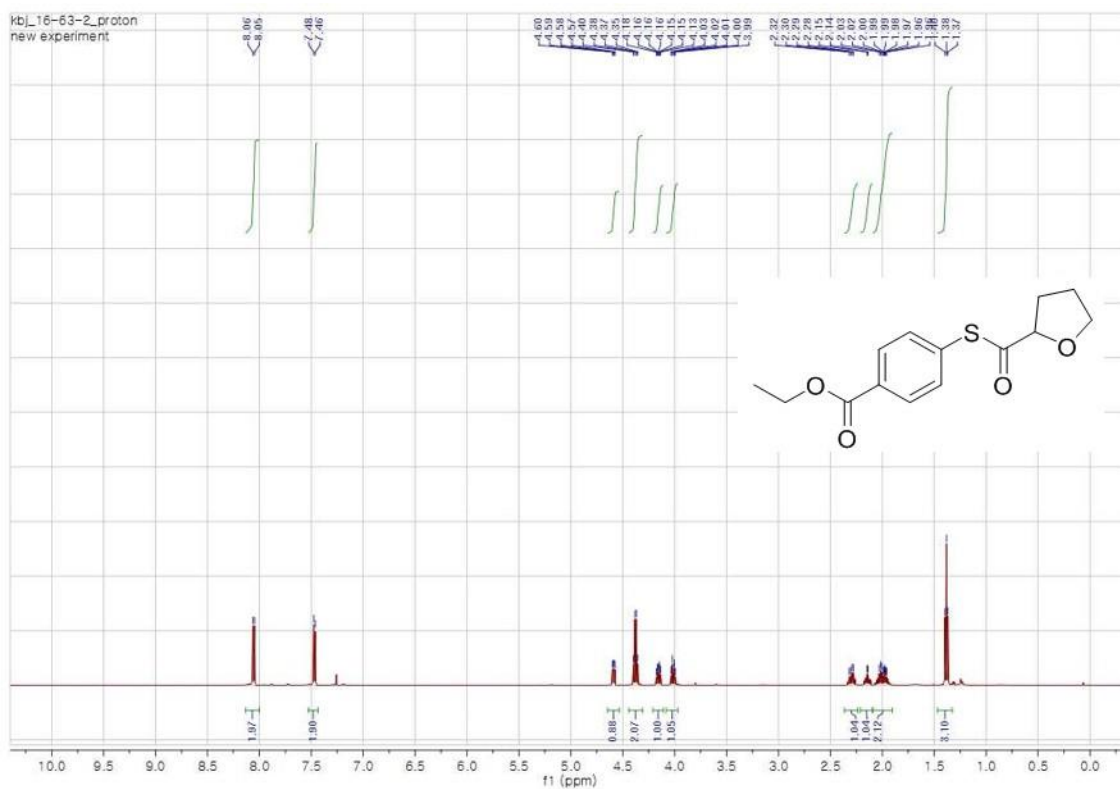

### <sup>13</sup>C NMR (30a)

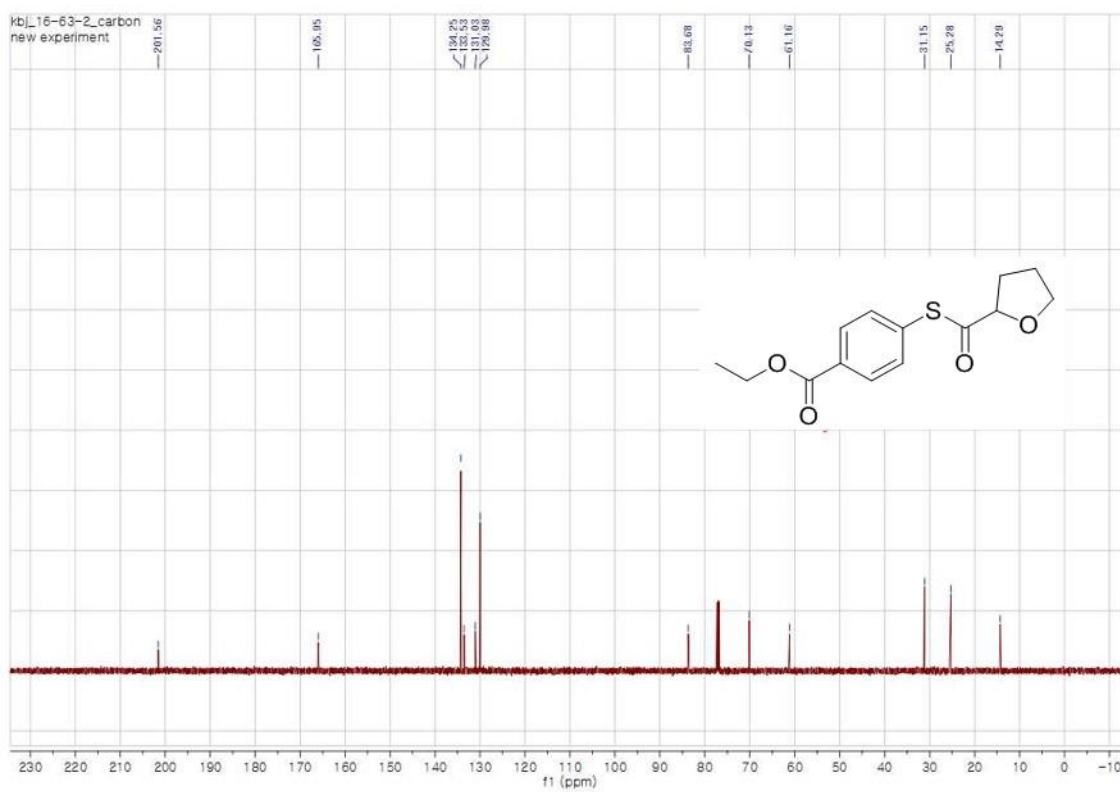

### <sup>1</sup>H NMR (3pa)

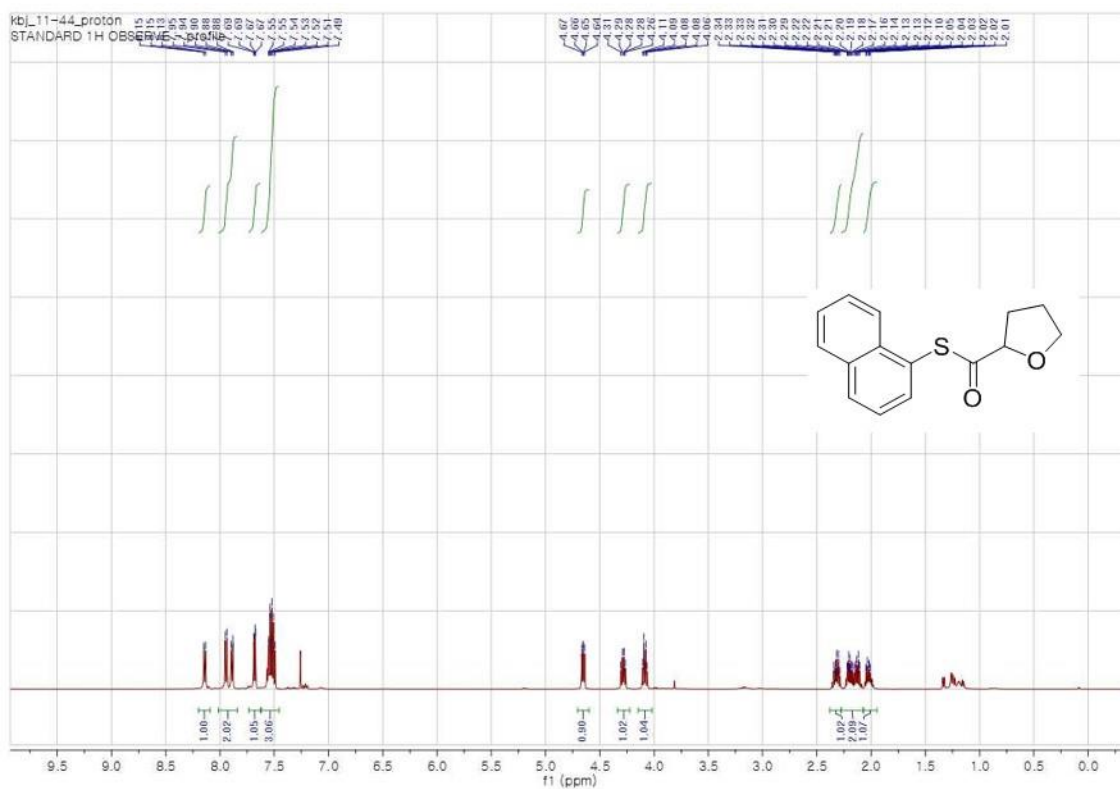

### <sup>13</sup>C NMR (3pa)

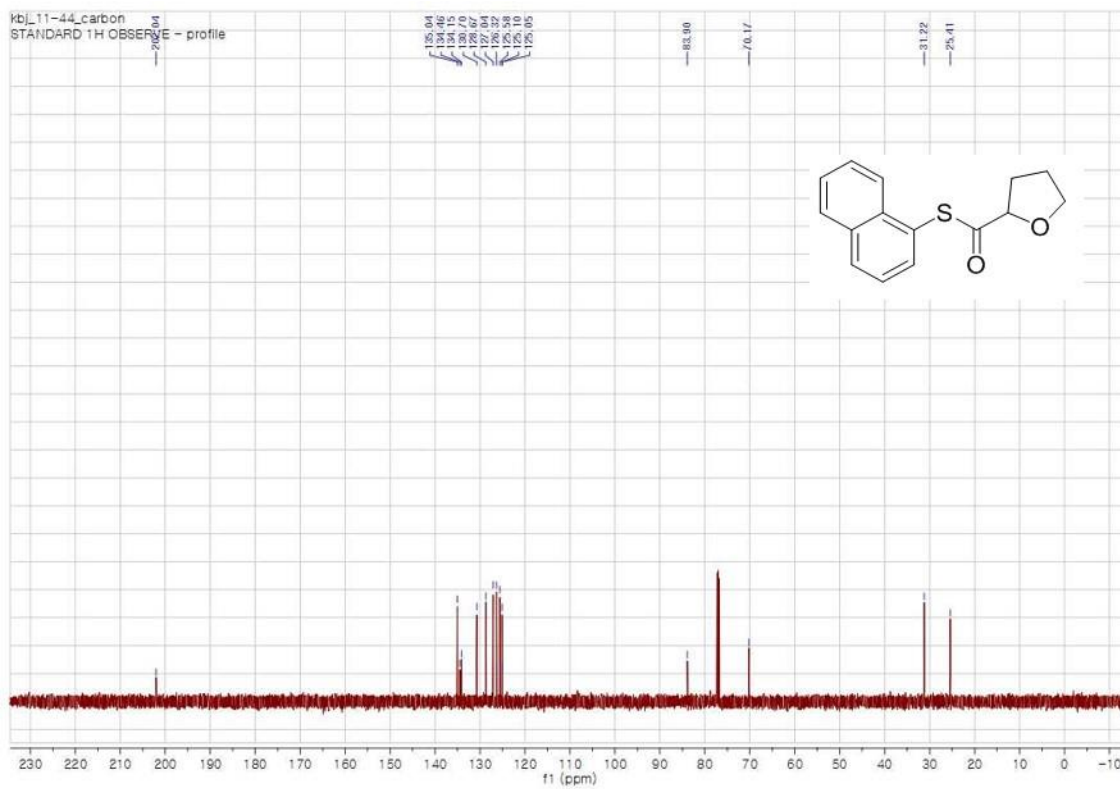



### <sup>1</sup>H NMR (3qa)

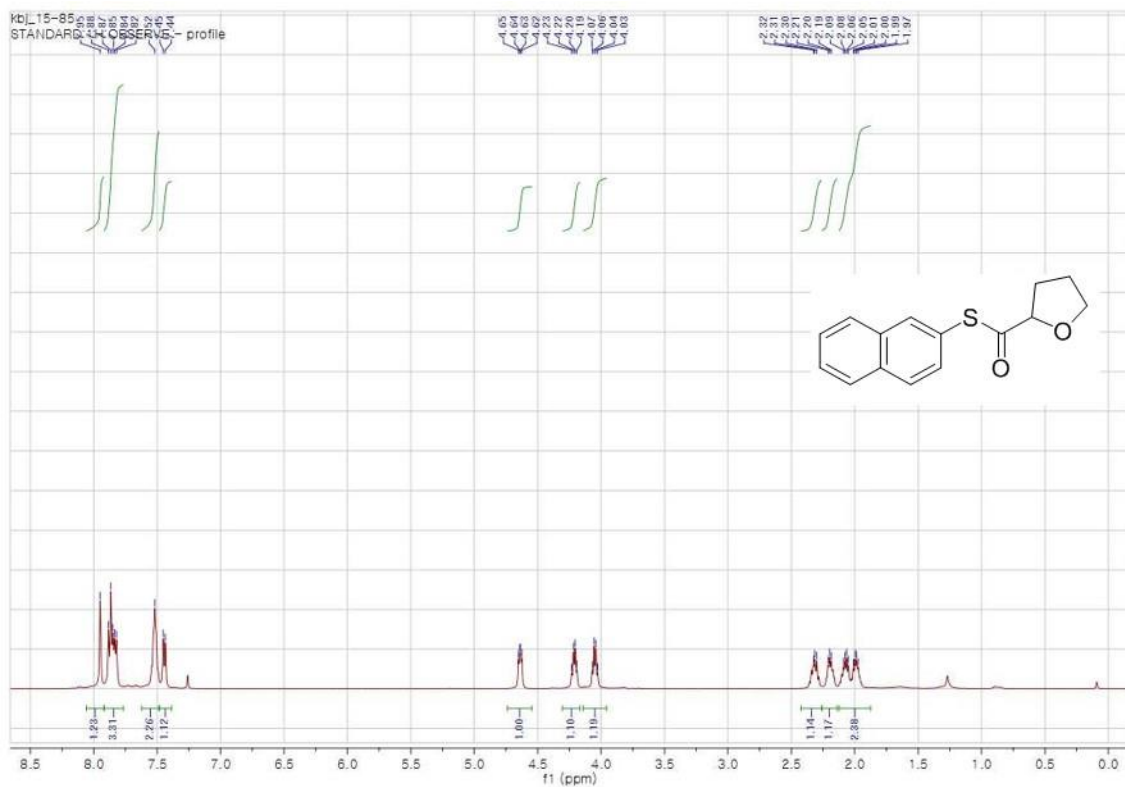

### <sup>13</sup>C NMR (3qa)

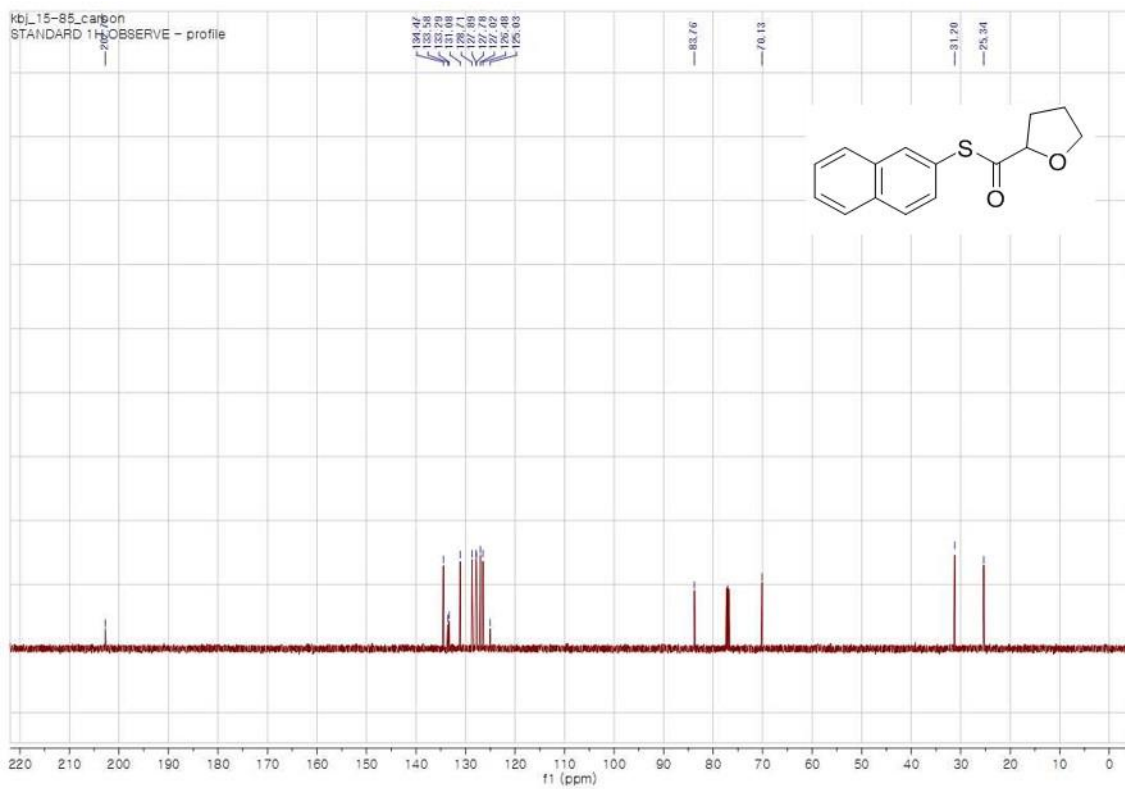



### <sup>1</sup>H NMR (3ra)

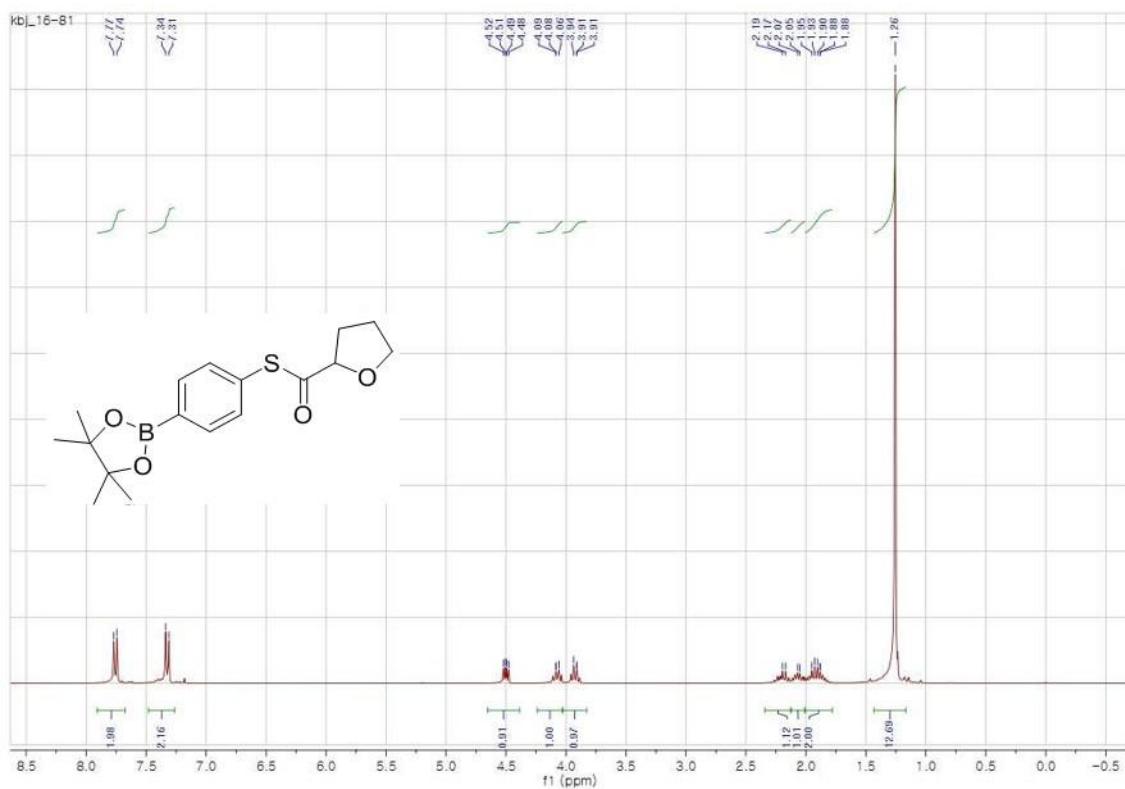

### <sup>13</sup>C NMR (3ra)

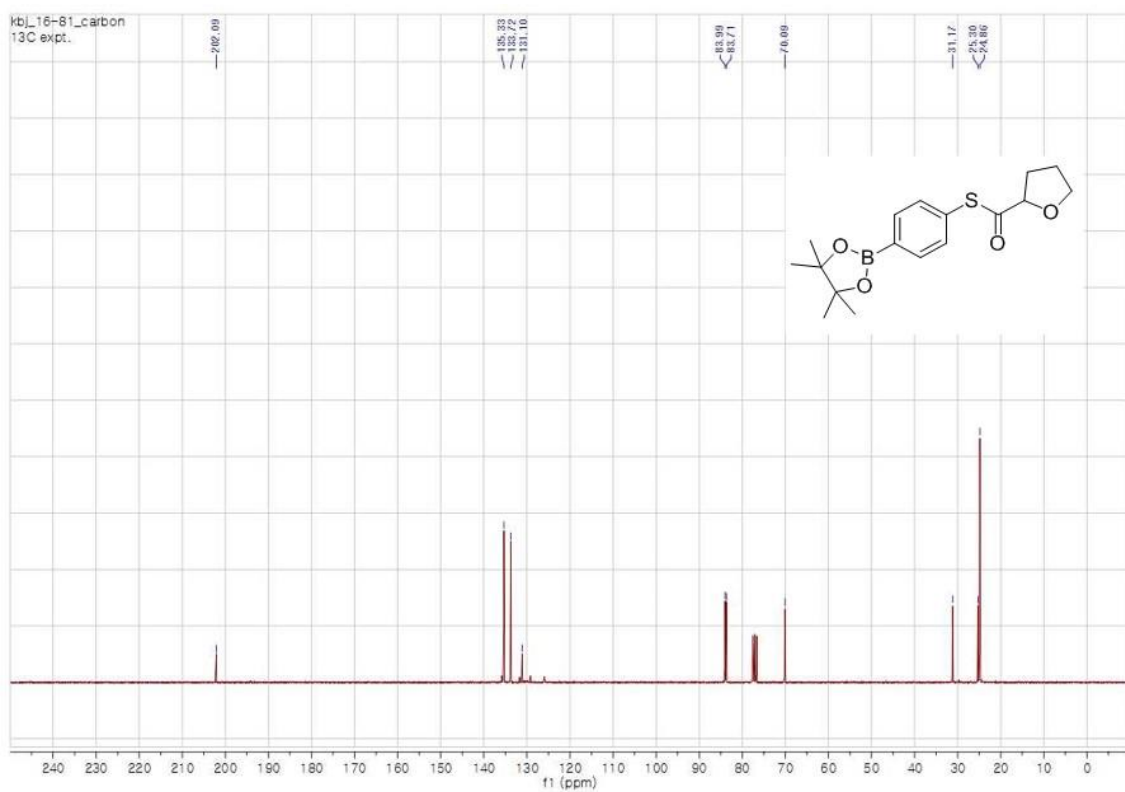

### <sup>1</sup>H NMR (3sa)

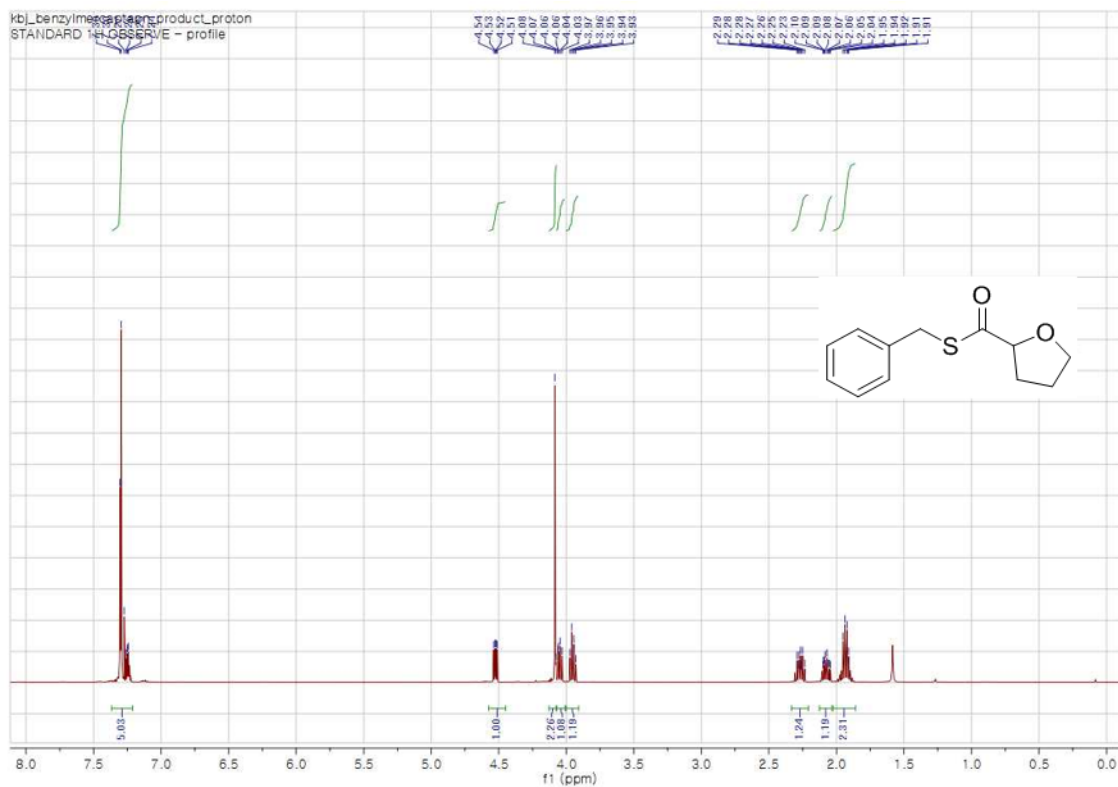

### <sup>13</sup>C NMR (3sa)

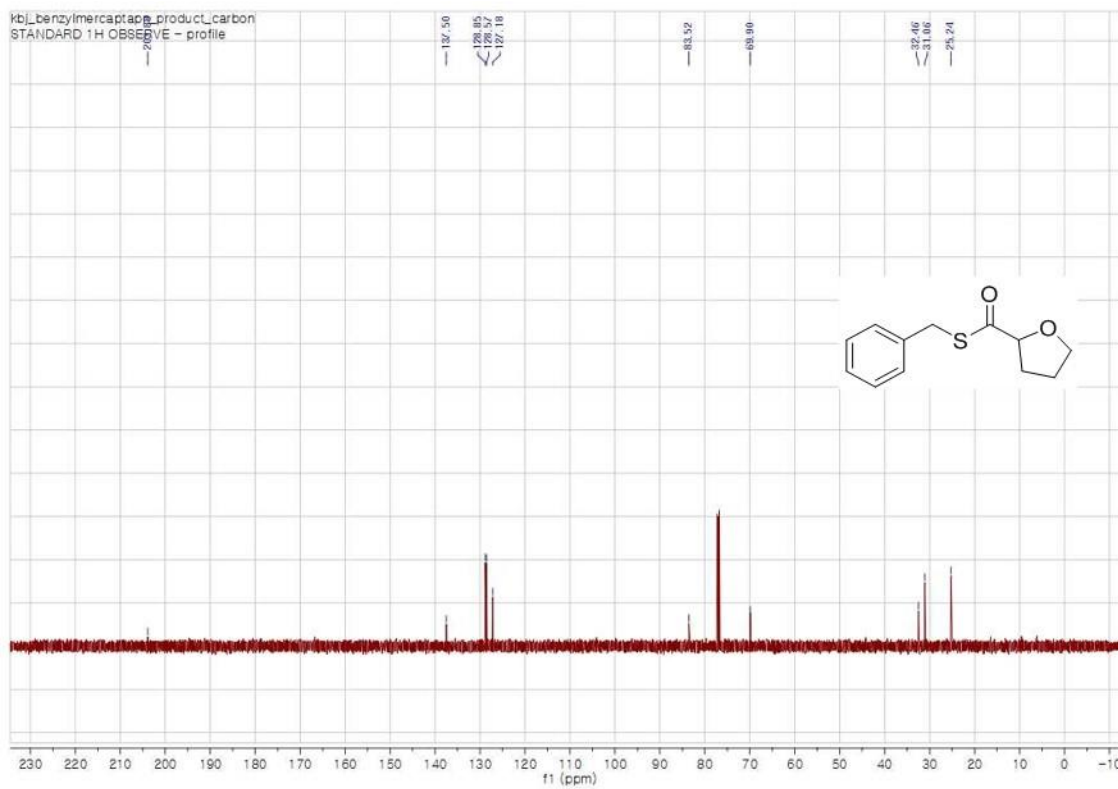

### <sup>1</sup>H NMR (3ta)

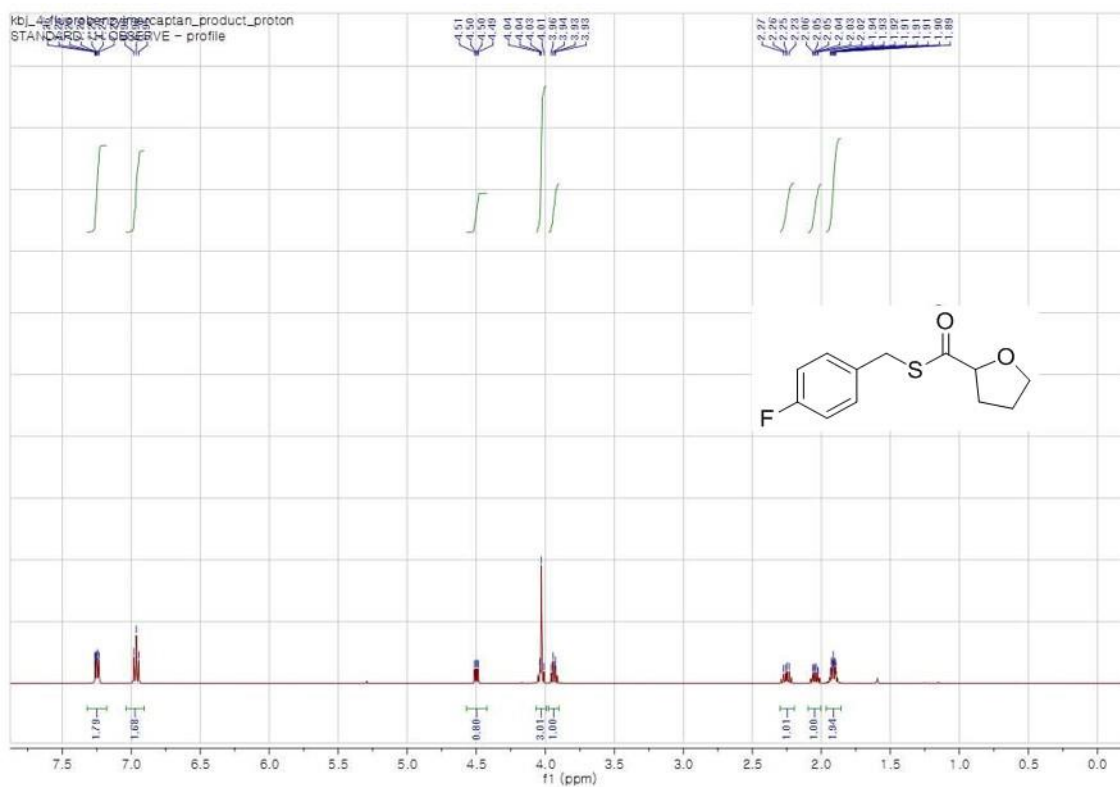

### <sup>13</sup>C NMR (3ta)

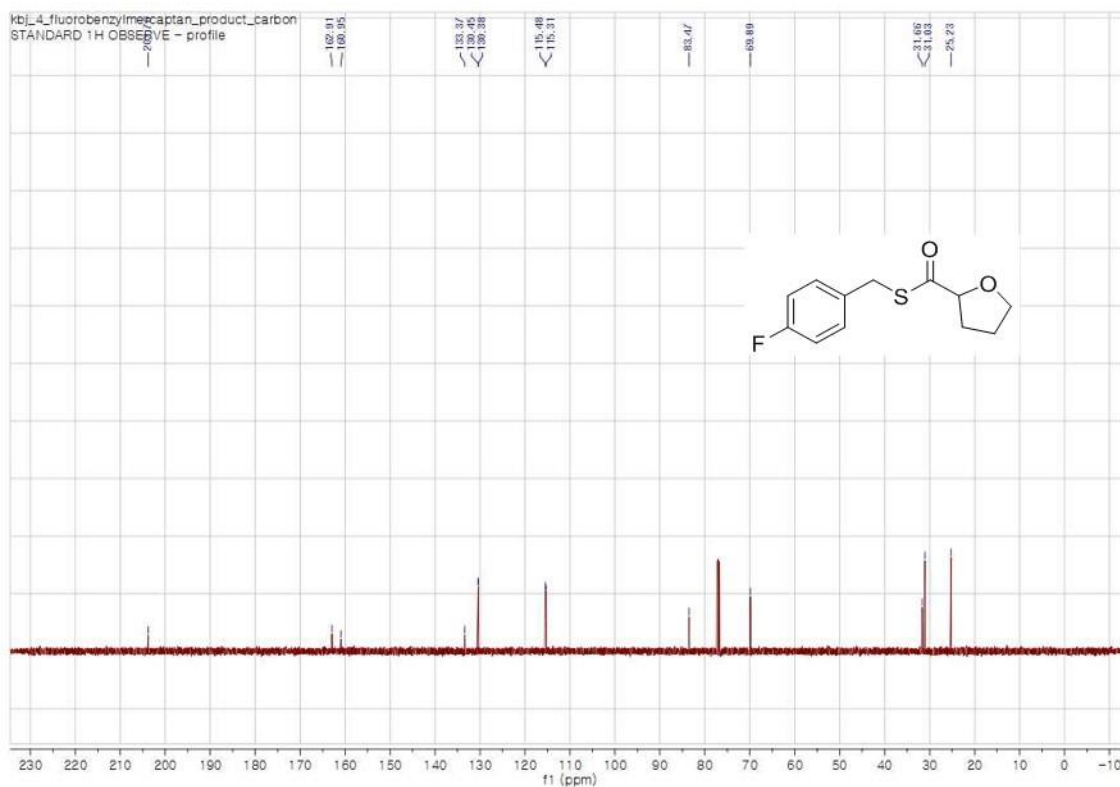

### <sup>1</sup>H NMR (3ab)

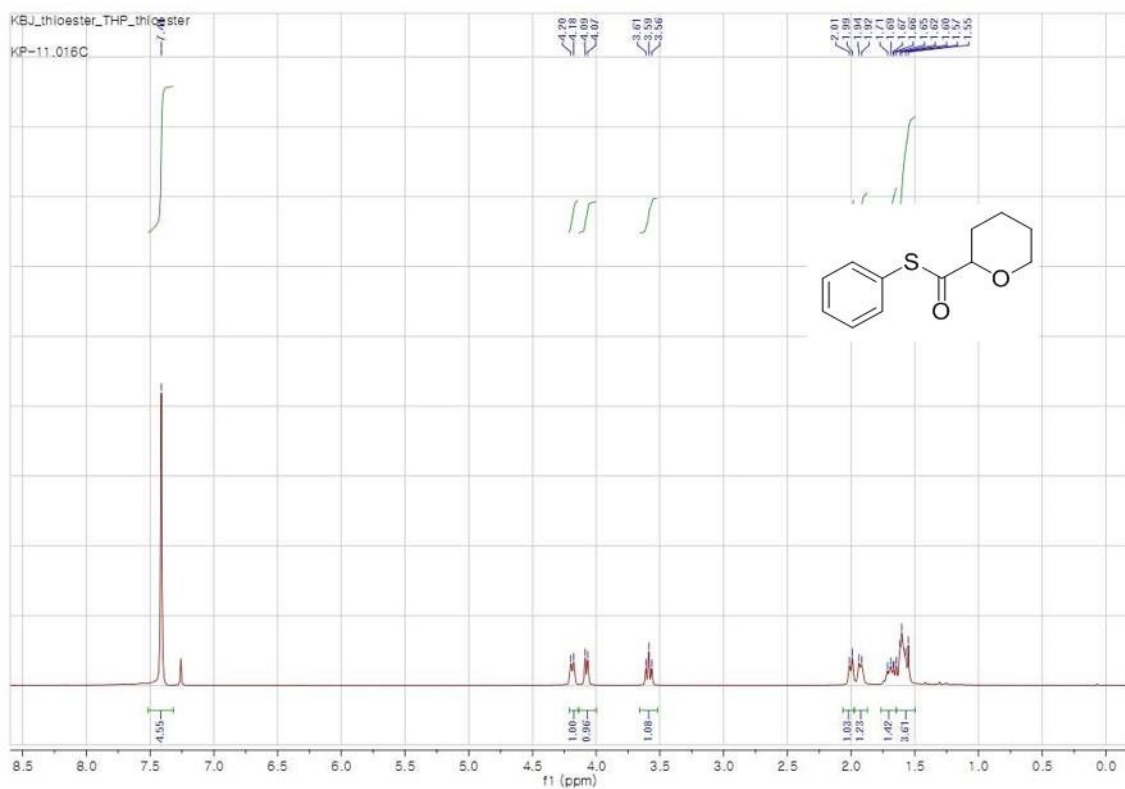

### <sup>13</sup>C NMR (3ab)

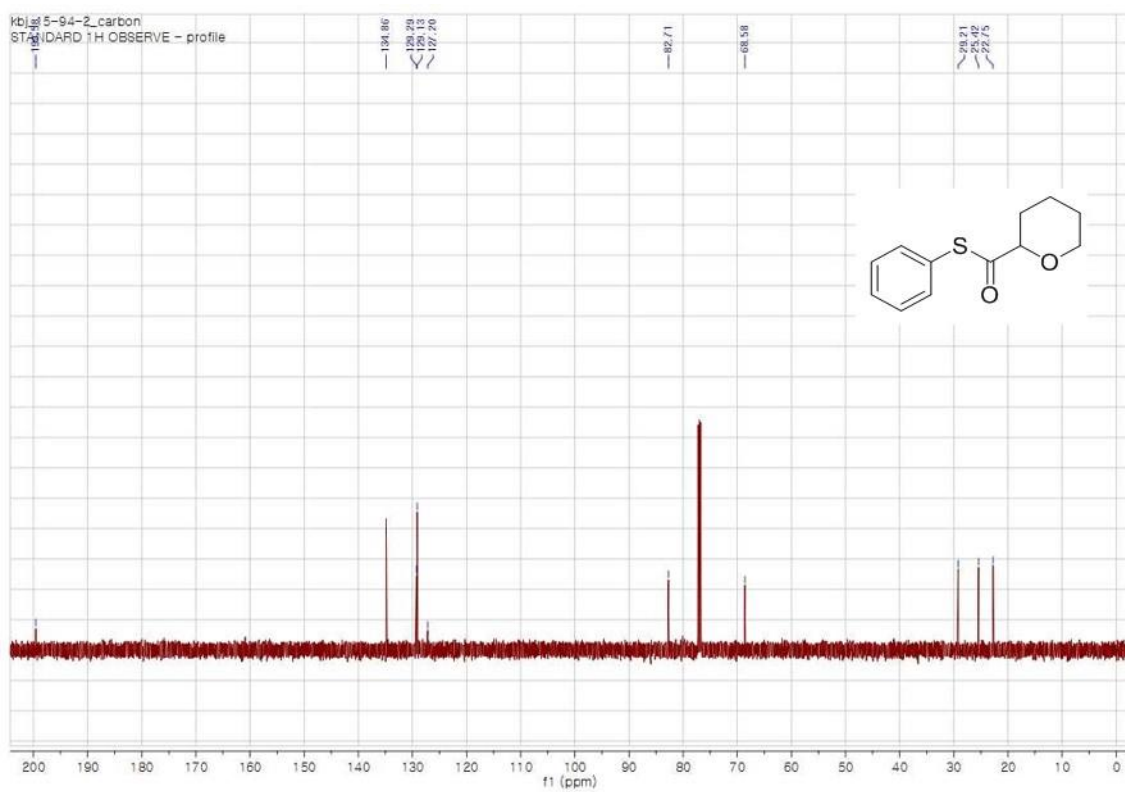

### <sup>1</sup>H NMR (3ac)

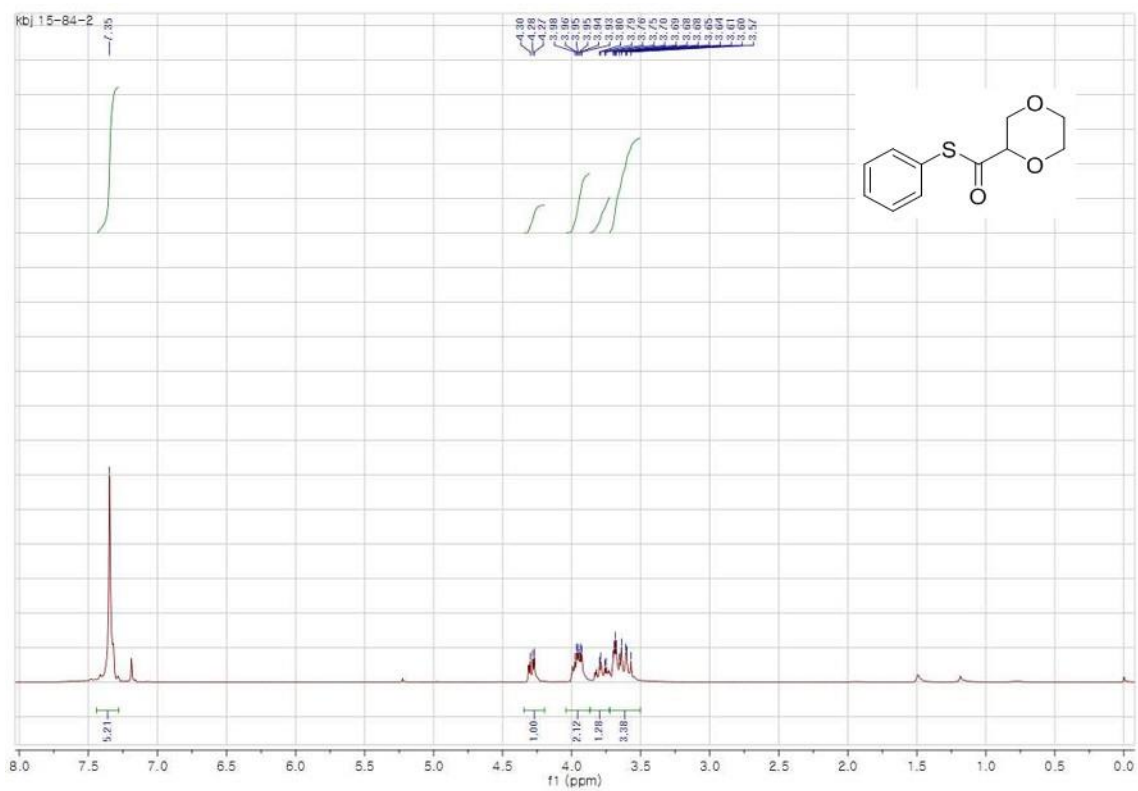

### <sup>13</sup>C NMR (3ac)

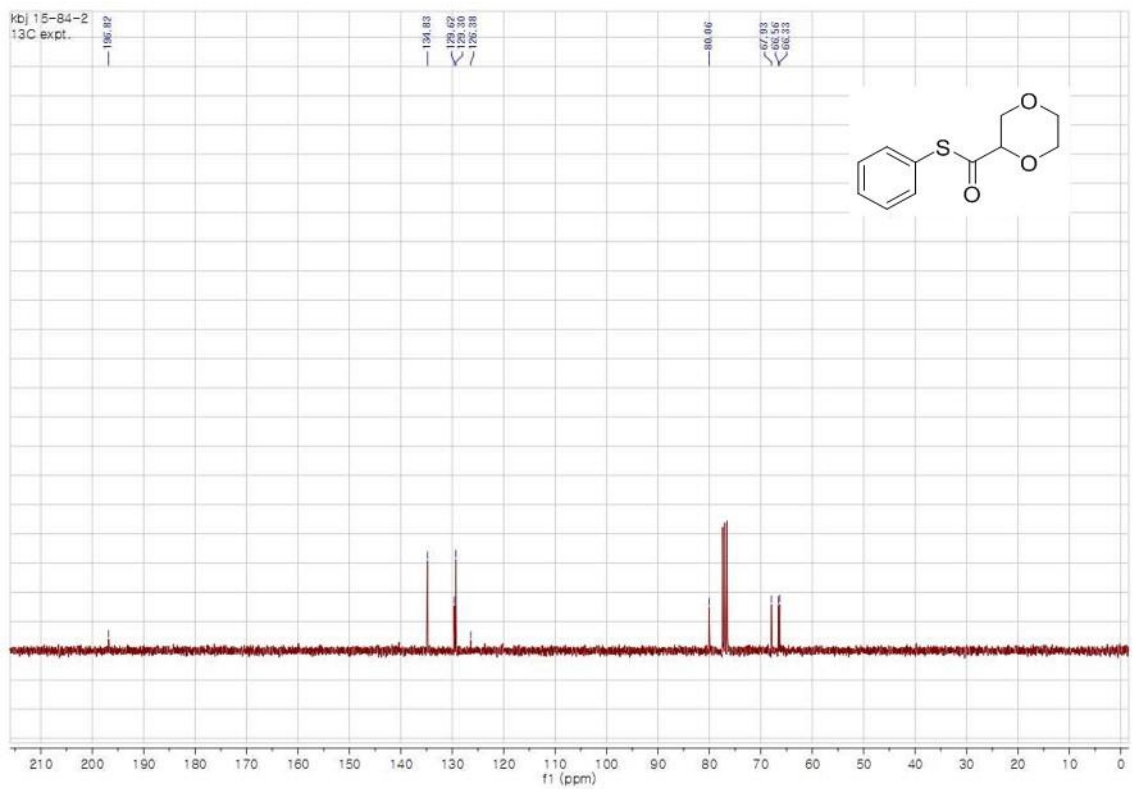

### <sup>1</sup>H NMR (3ad)

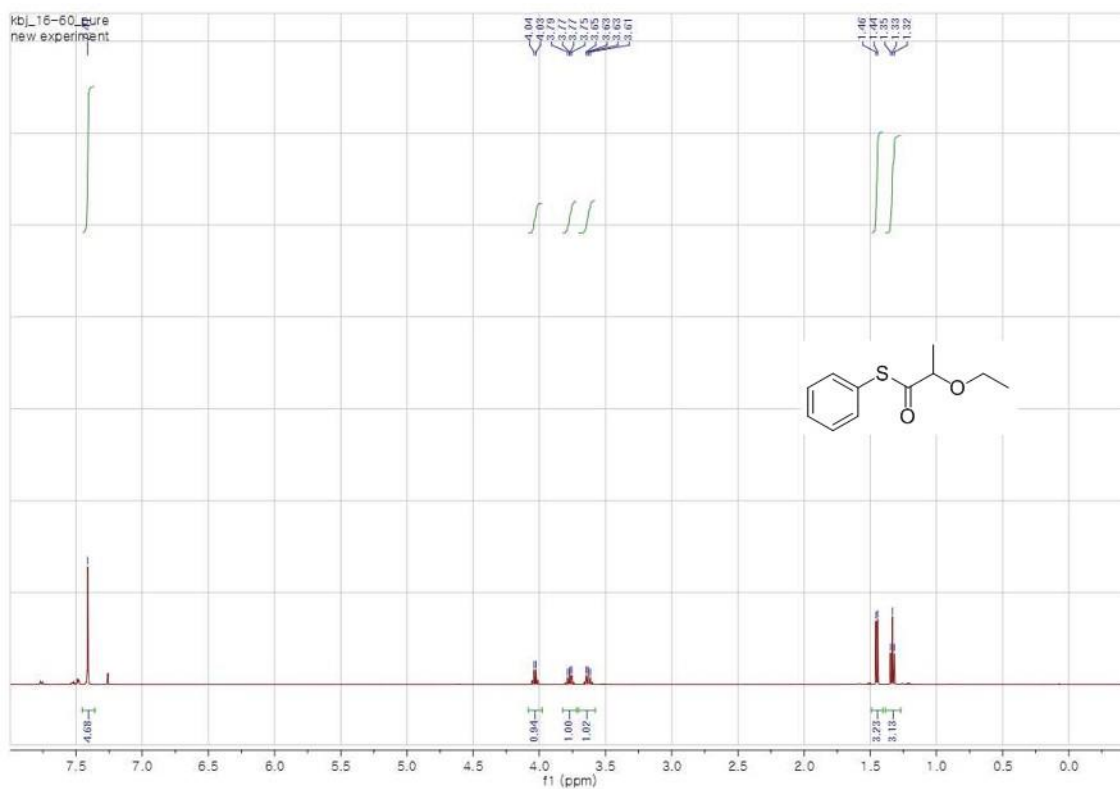

### <sup>13</sup>C NMR (3ad)

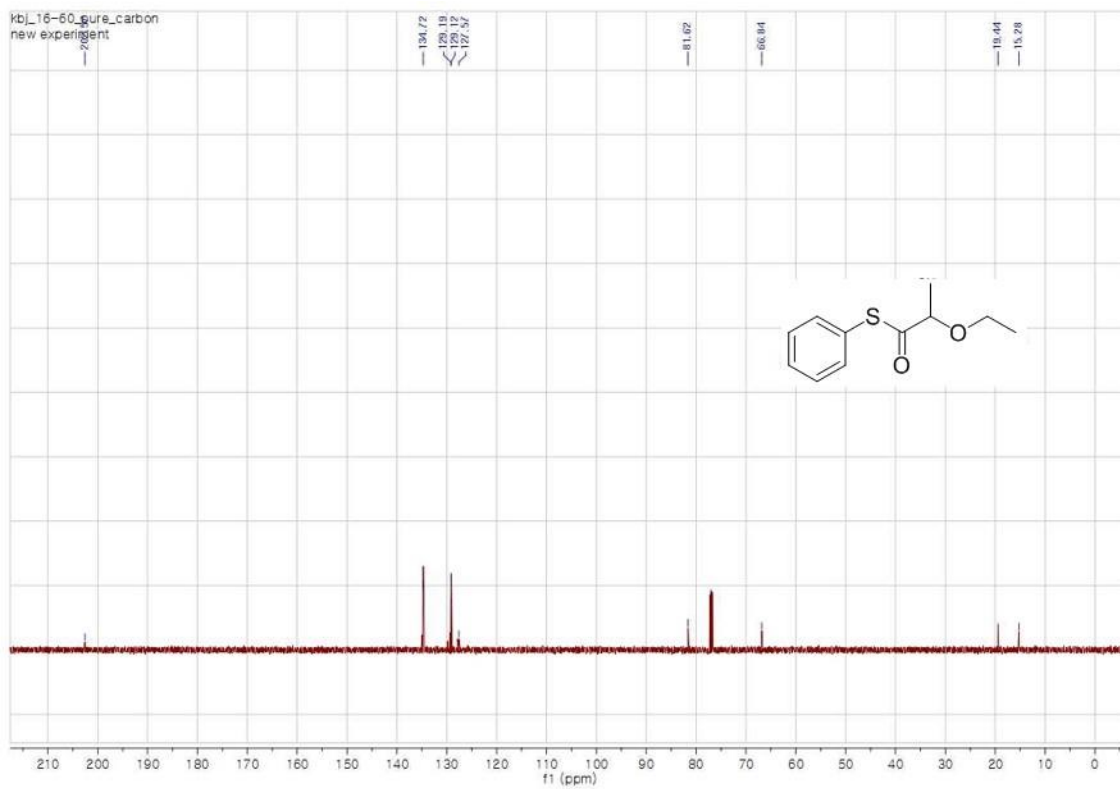

### <sup>1</sup>H NMR (3ae)

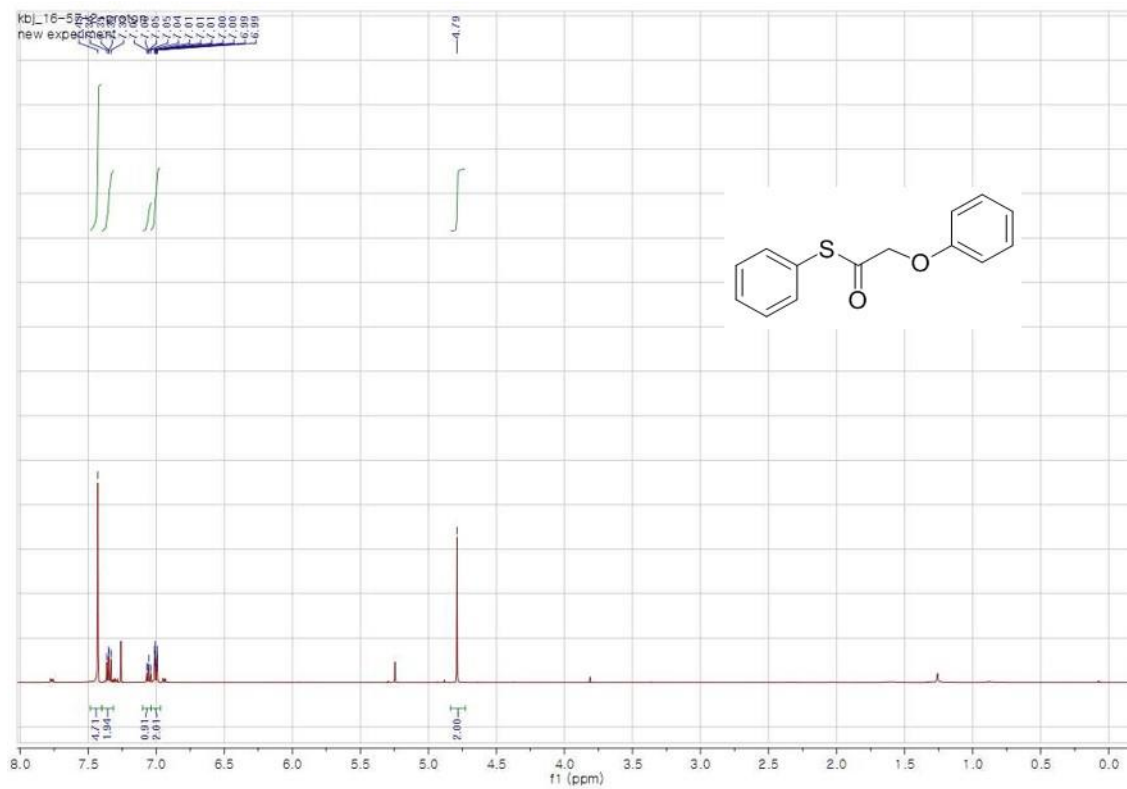

### <sup>13</sup>C NMR (3ae)

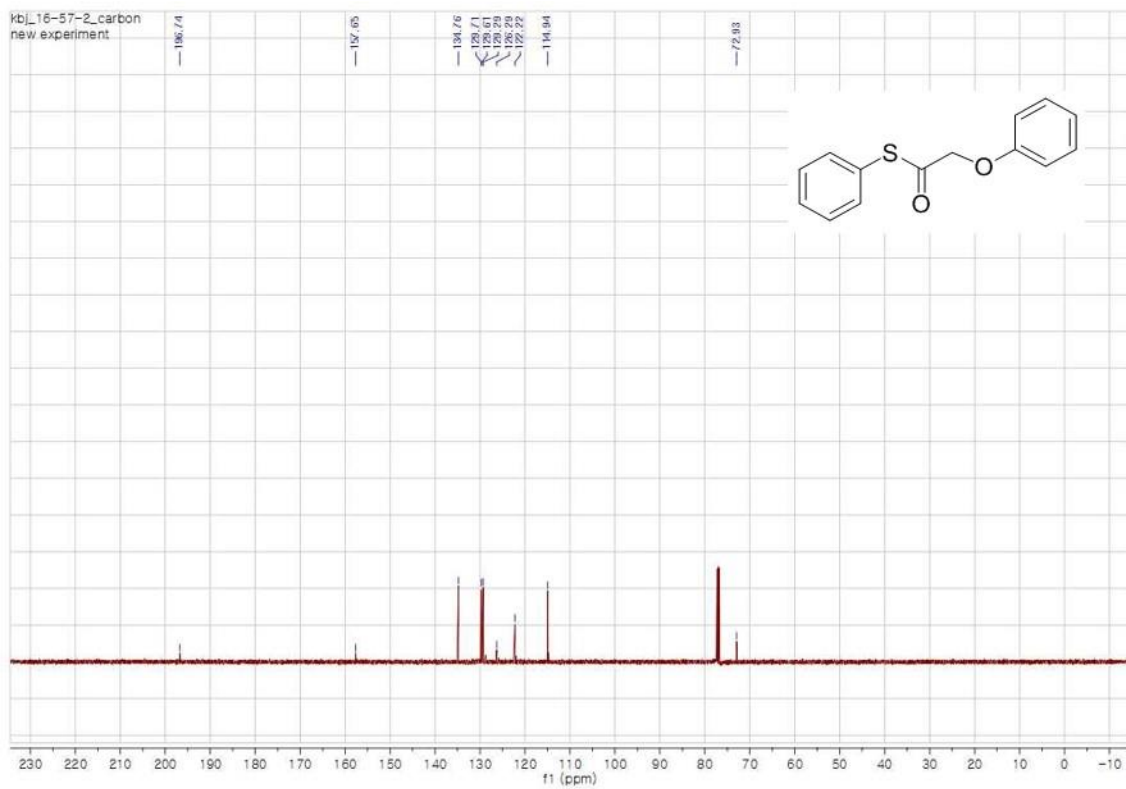

### <sup>1</sup>H NMR (3af)

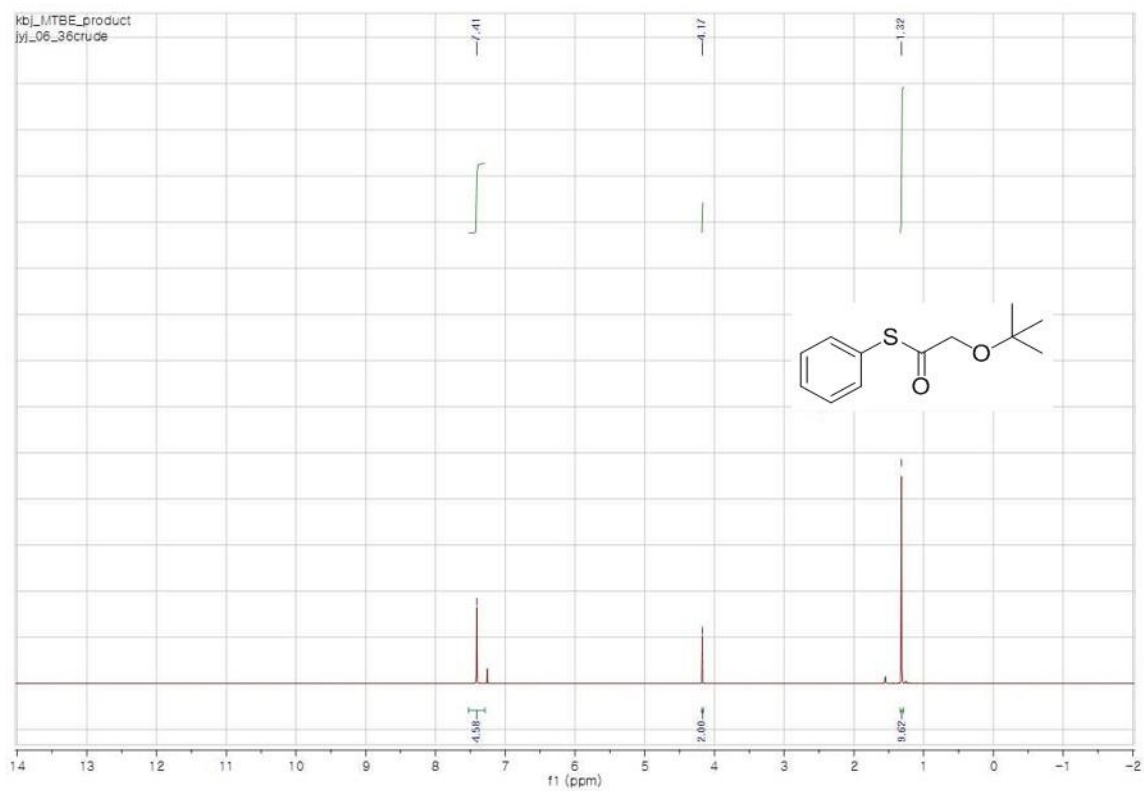

### <sup>13</sup>C NMR (3af)

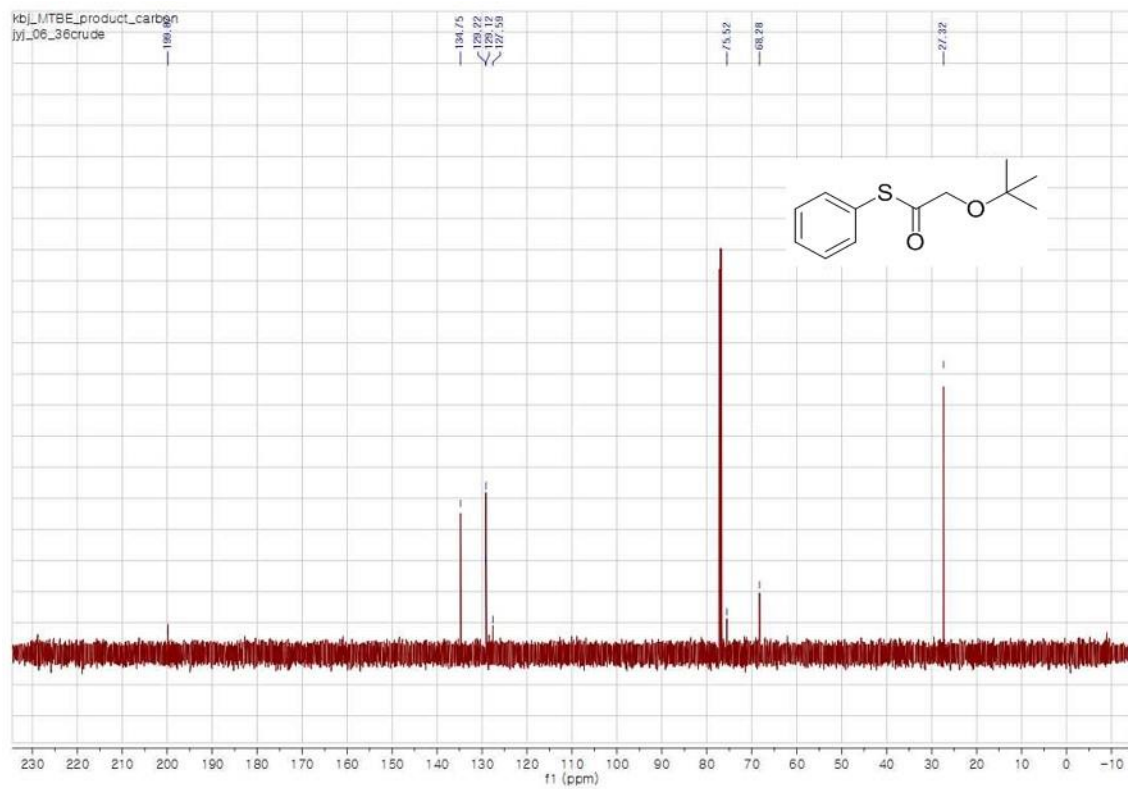



# <sup>1</sup>H NMR (1a)

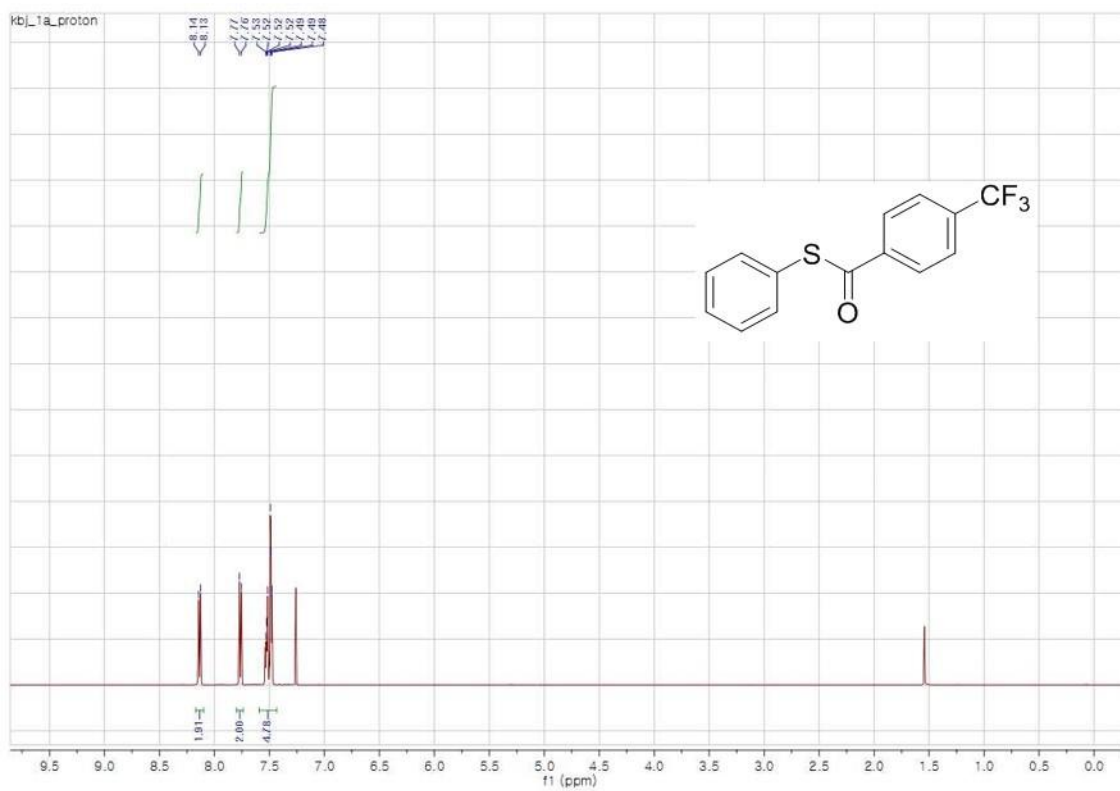

### <sup>1</sup>H NMR (1b)

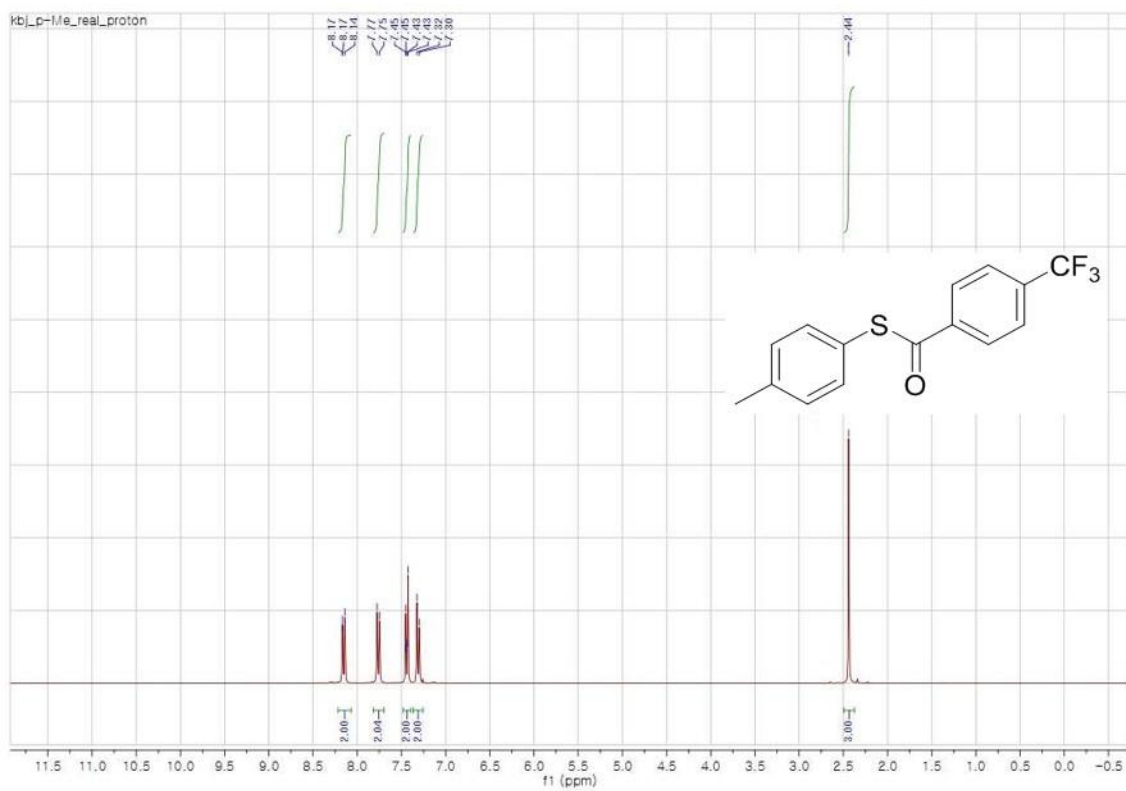

### <sup>13</sup>C NMR (1b)

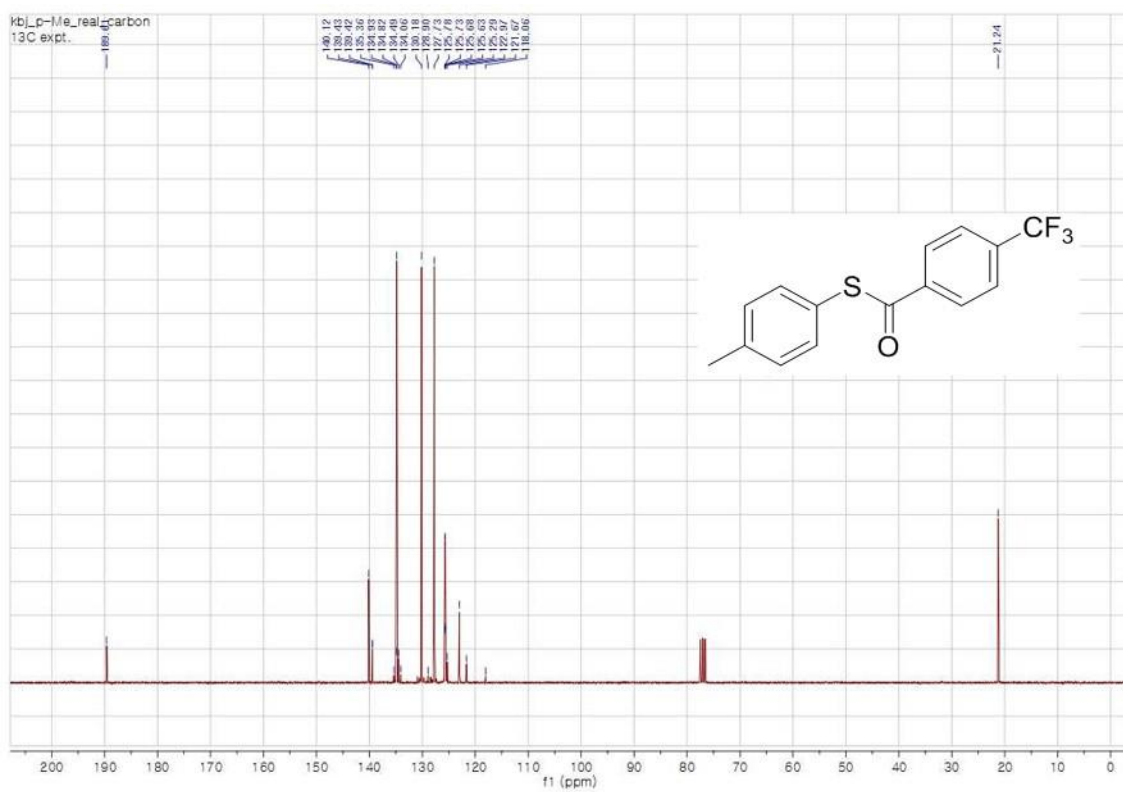

### <sup>1</sup>H NMR (1c)

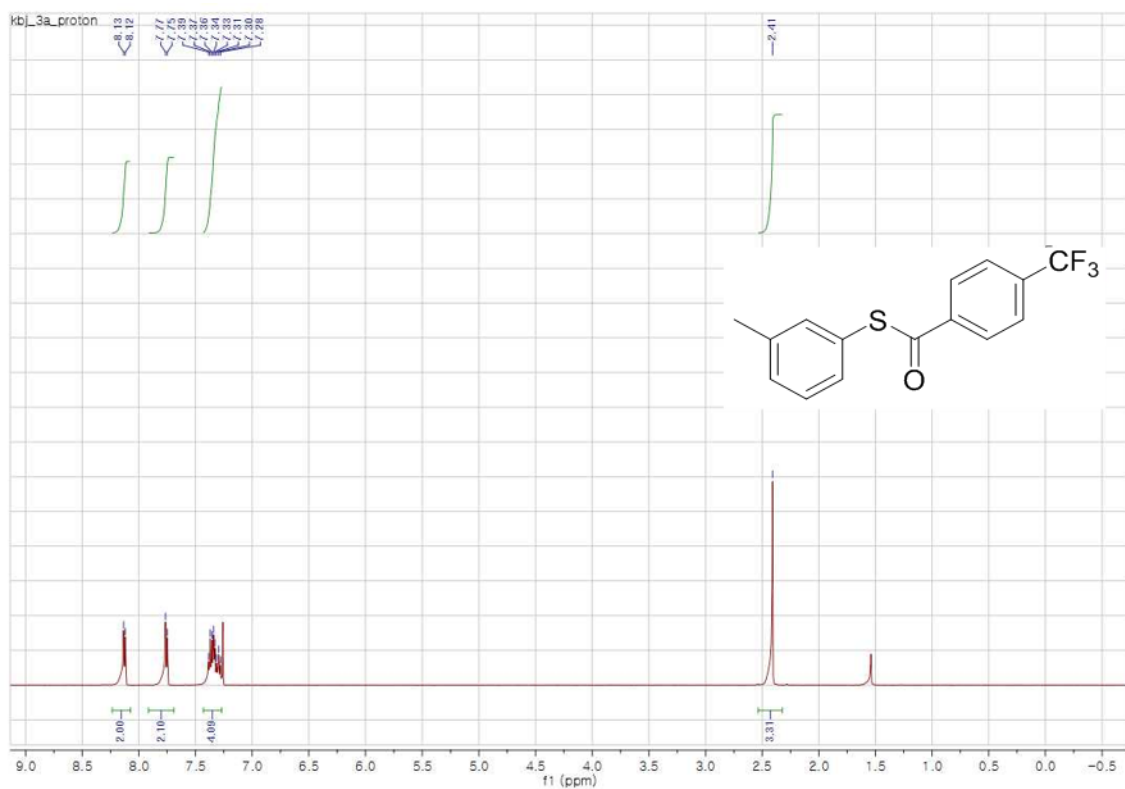

### <sup>13</sup>C NMR (1c)

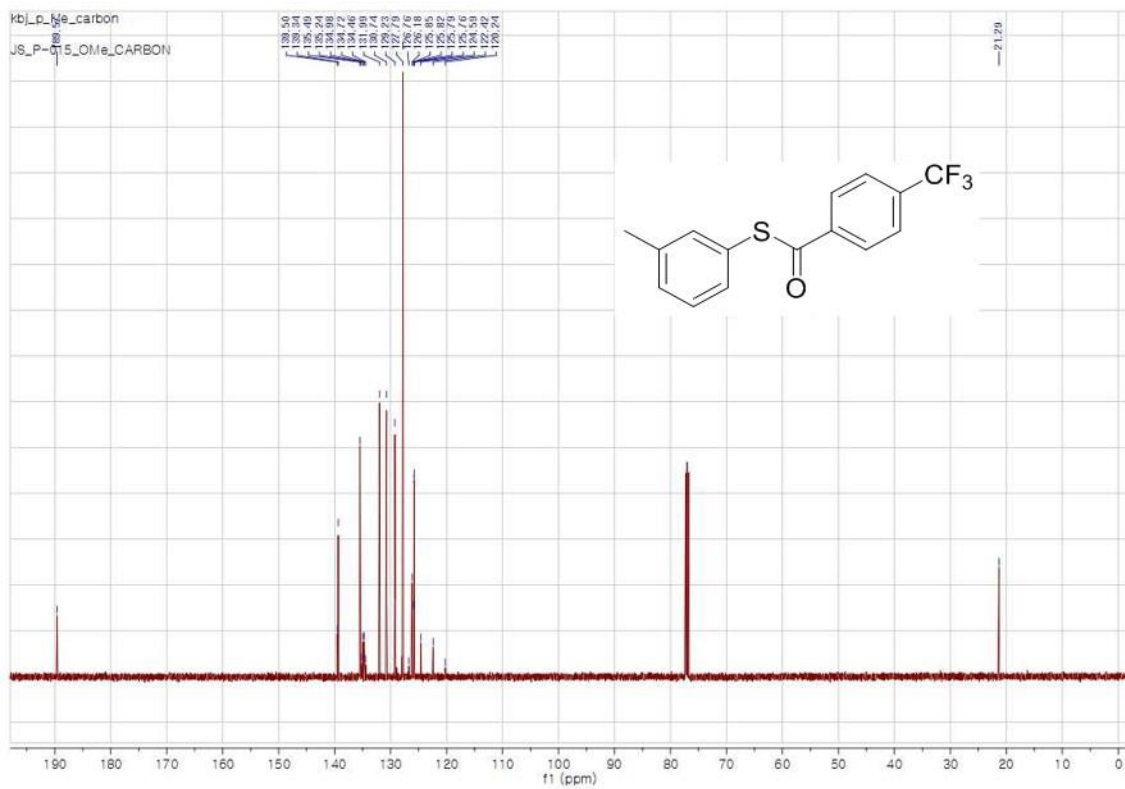

### <sup>1</sup>H NMR (1d)

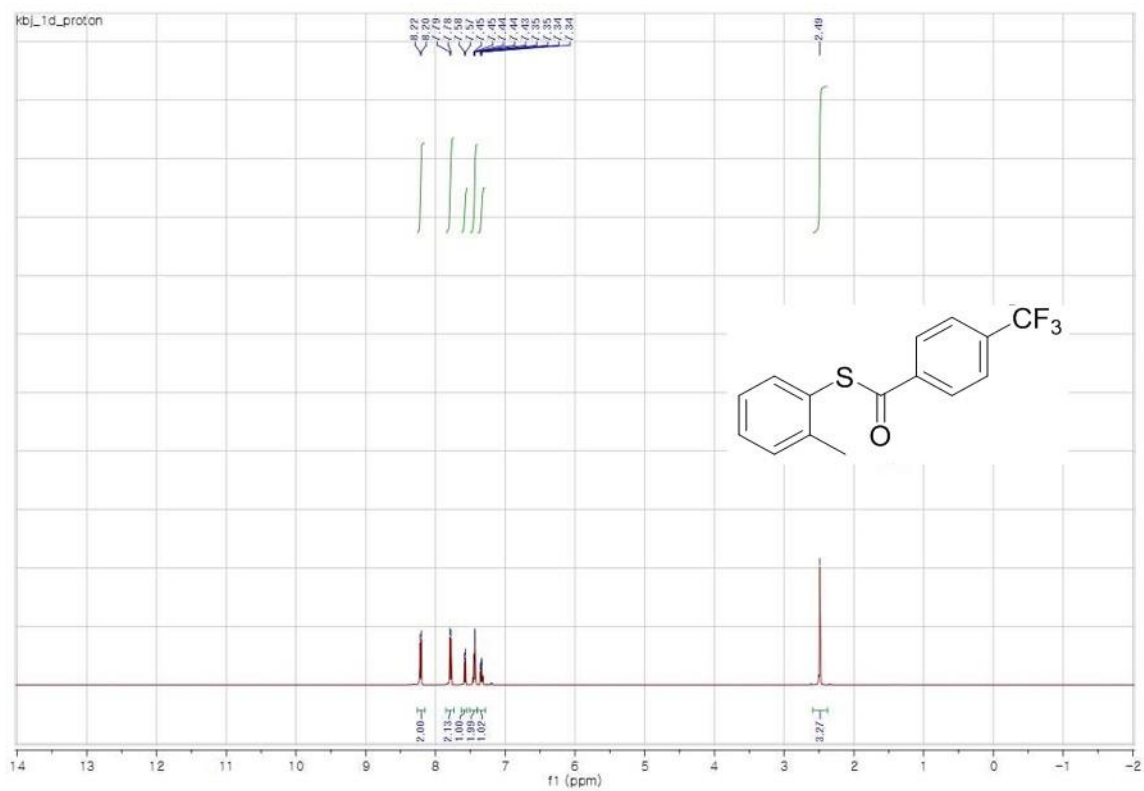

### <sup>13</sup>C NMR (1d)

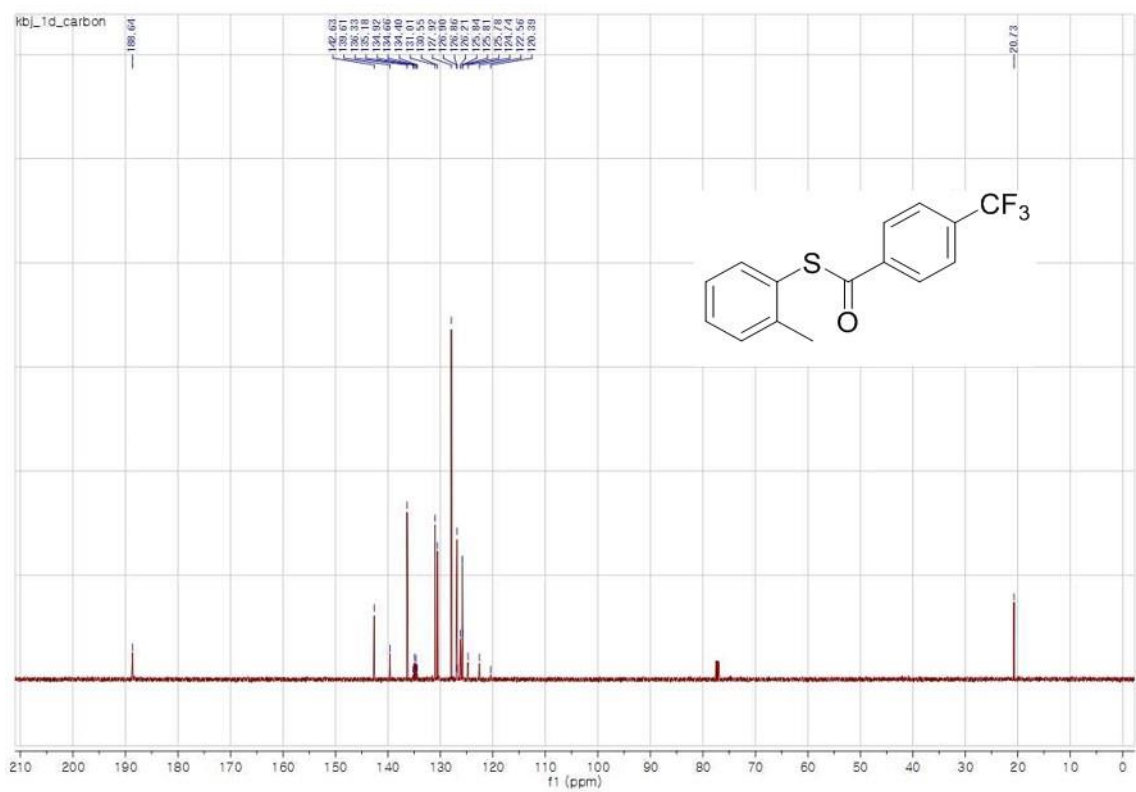

### <sup>1</sup>H NMR (1e)

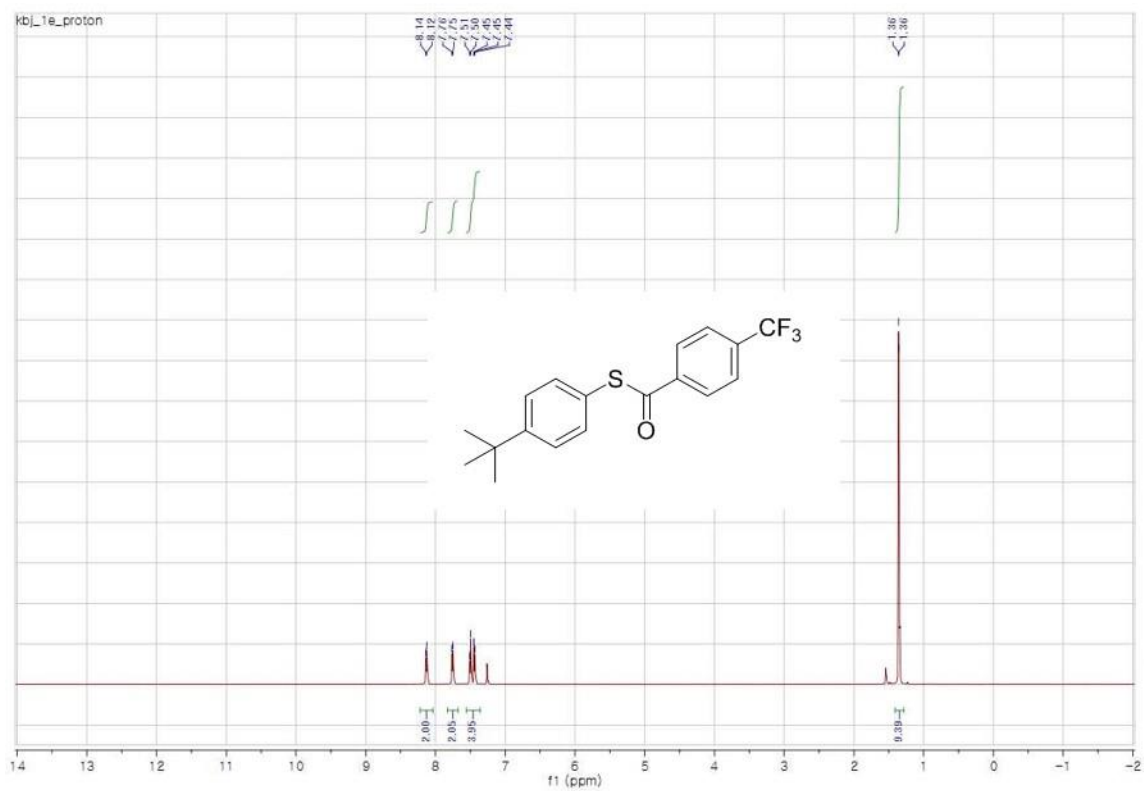

### <sup>13</sup>C NMR (1e)

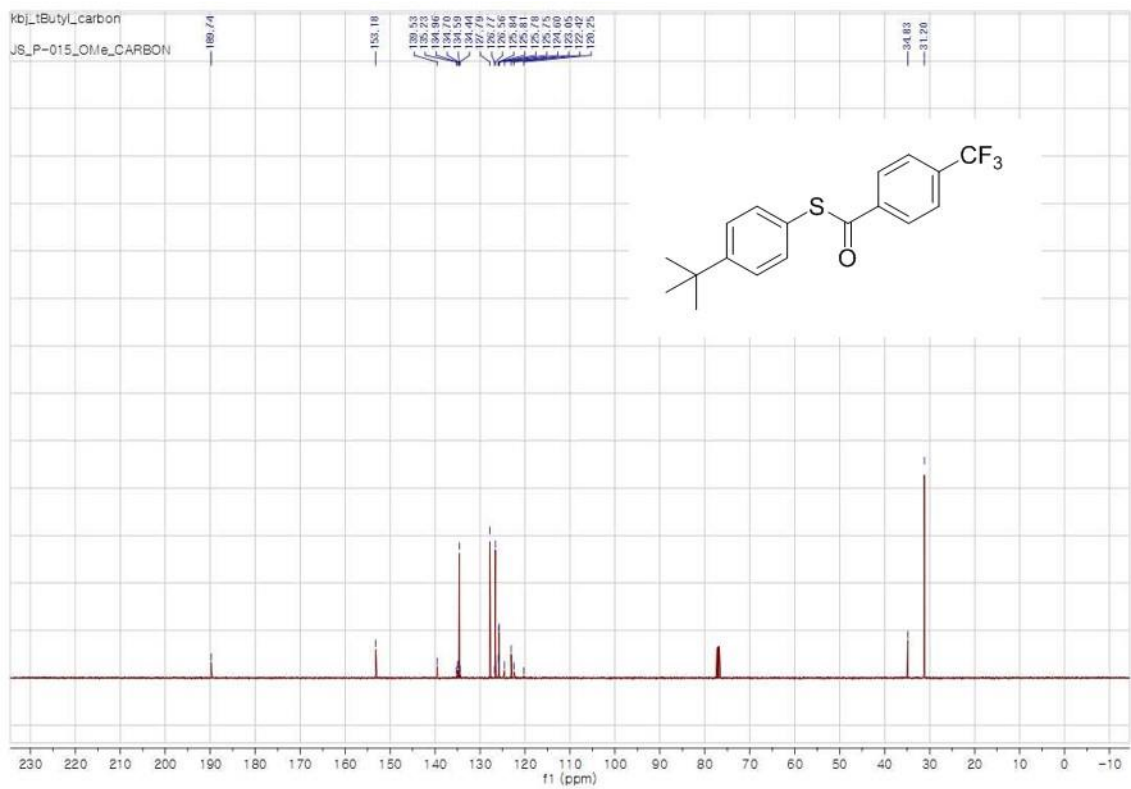

### <sup>1</sup>H NMR (1f)

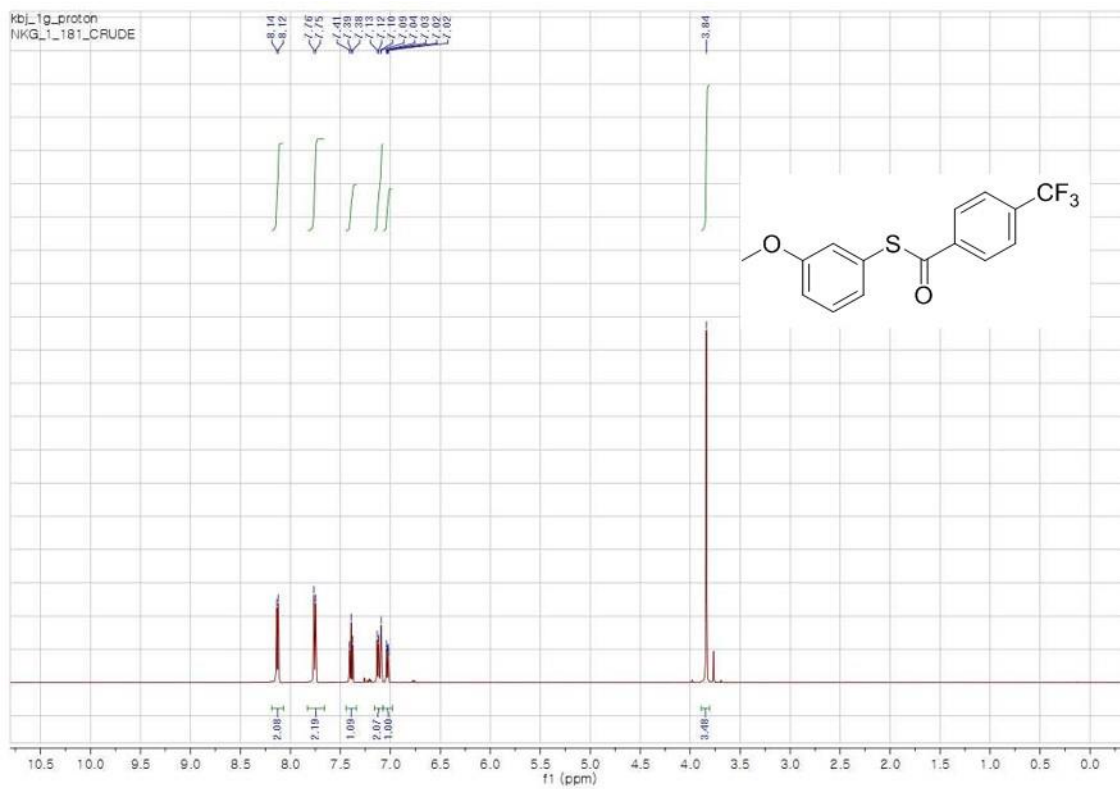

### <sup>13</sup>C NMR (1f)

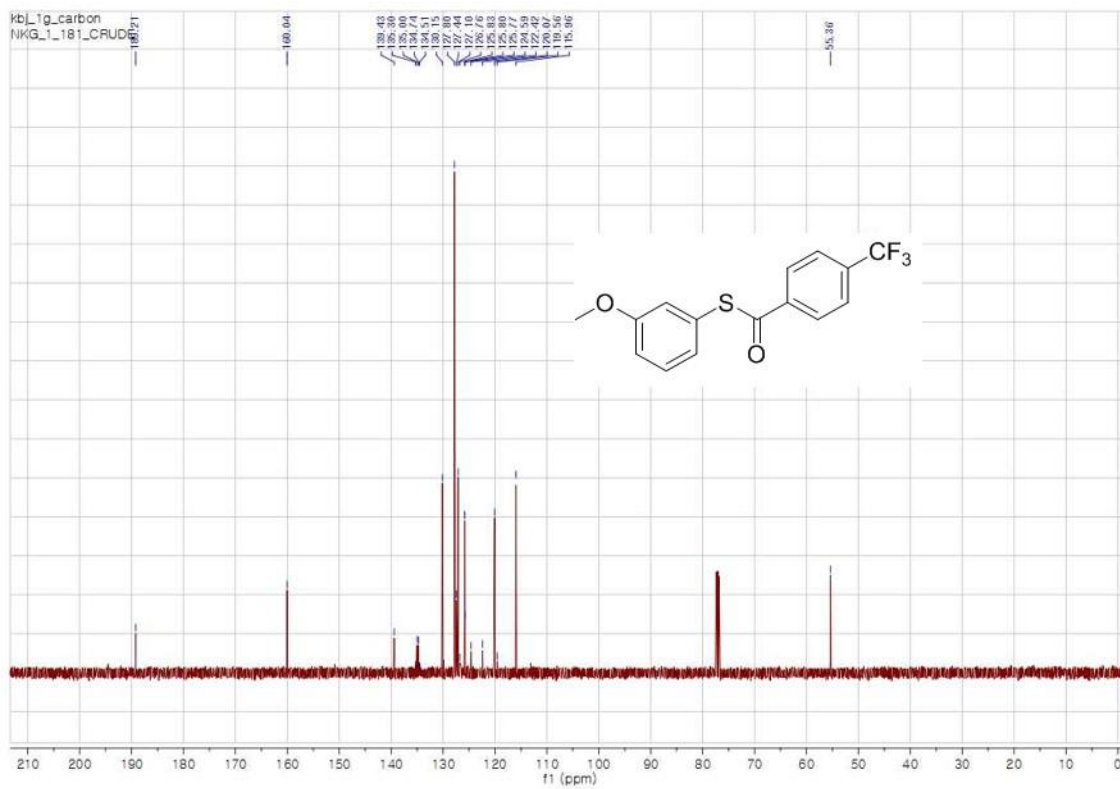

### <sup>1</sup>H NMR (1g)

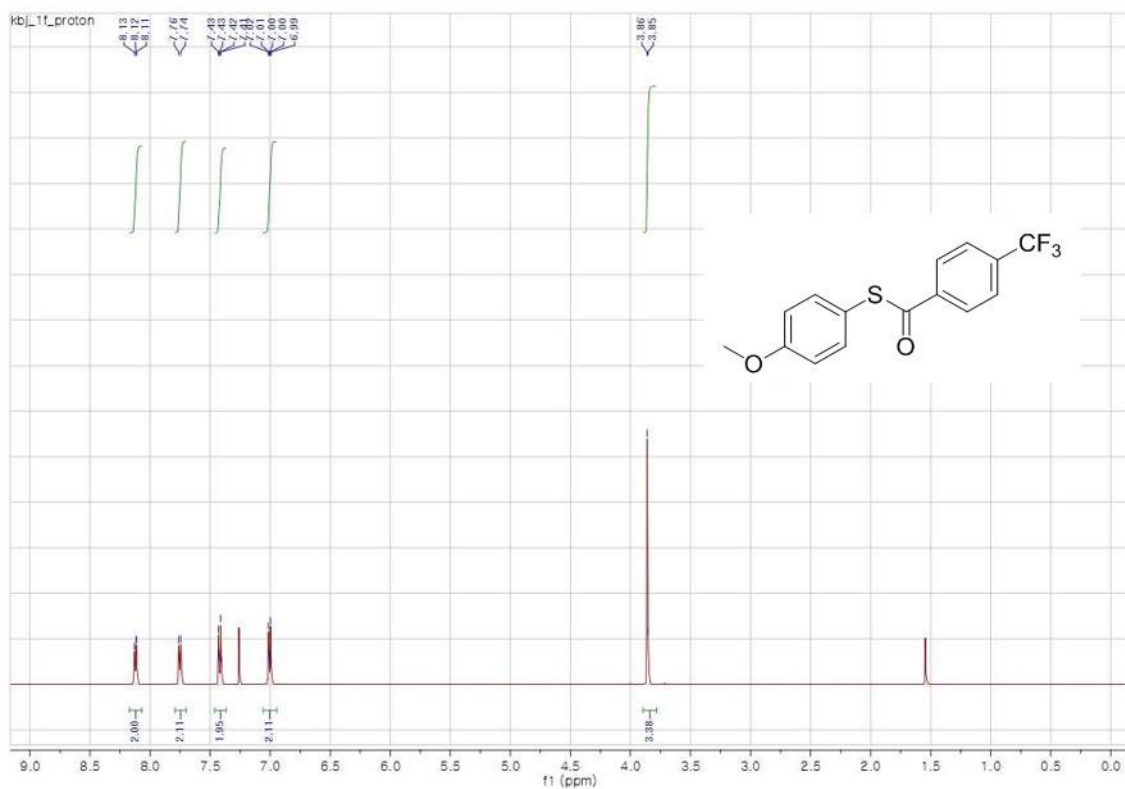

### <sup>13</sup>C NMR (1g)

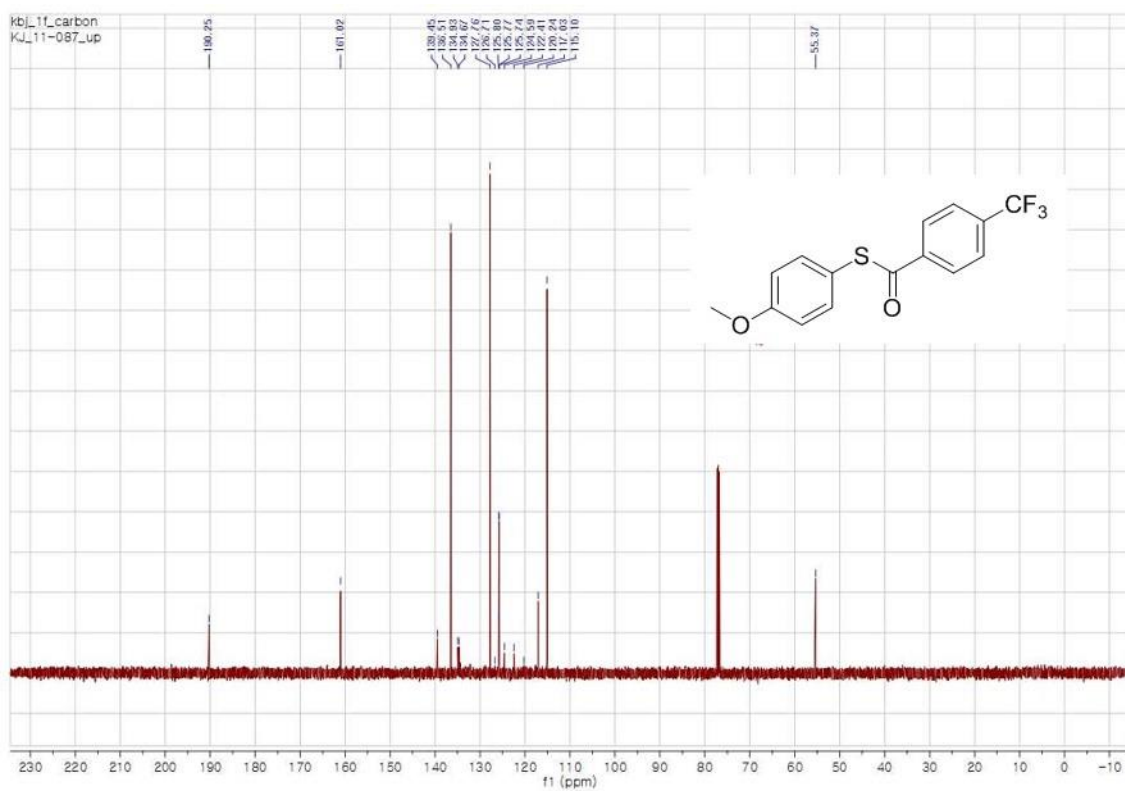

# <sup>1</sup>H NMR (1h)

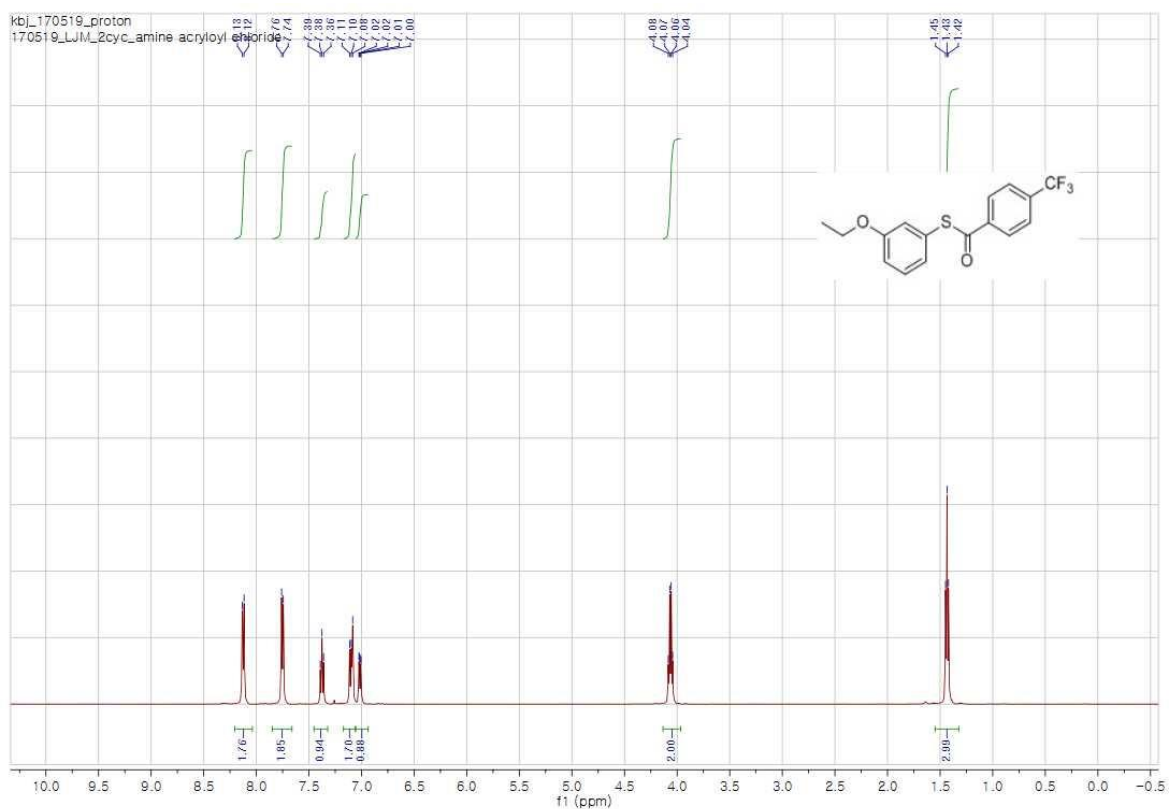

# <sup>13</sup>C NMR (1h)

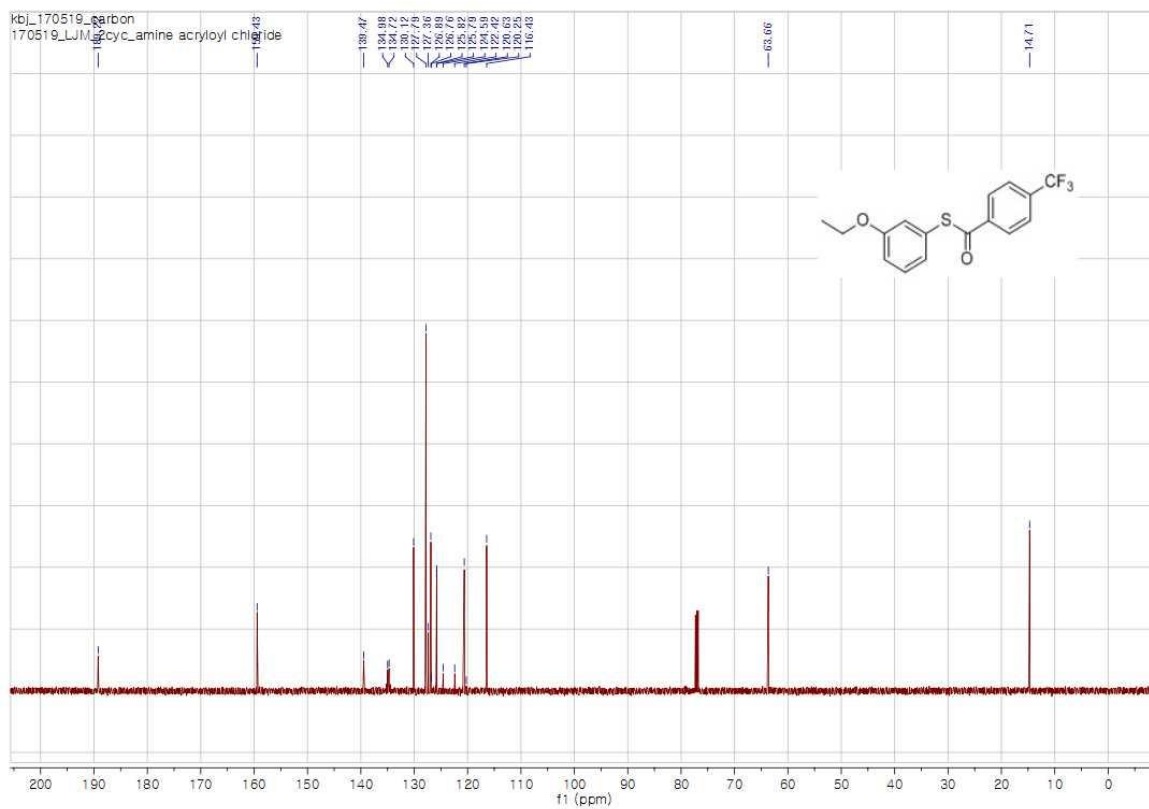



### <sup>1</sup>H NMR (1i)

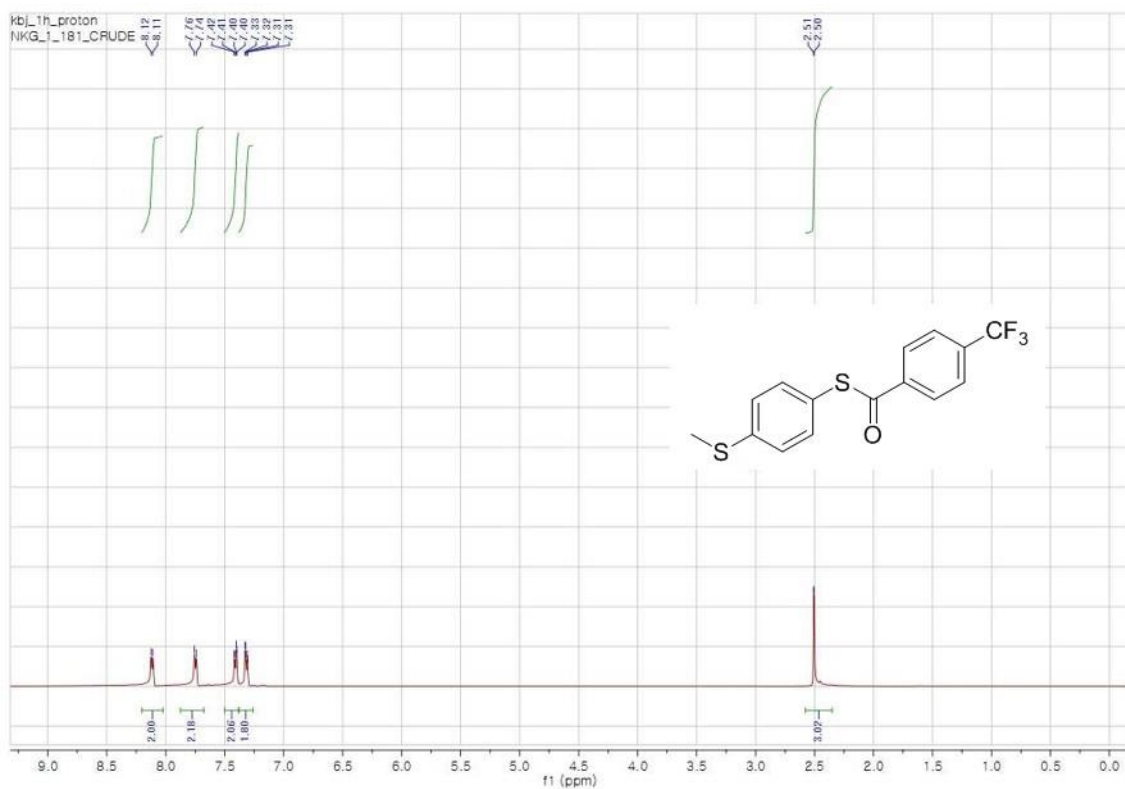

### <sup>13</sup>C NMR (1i)

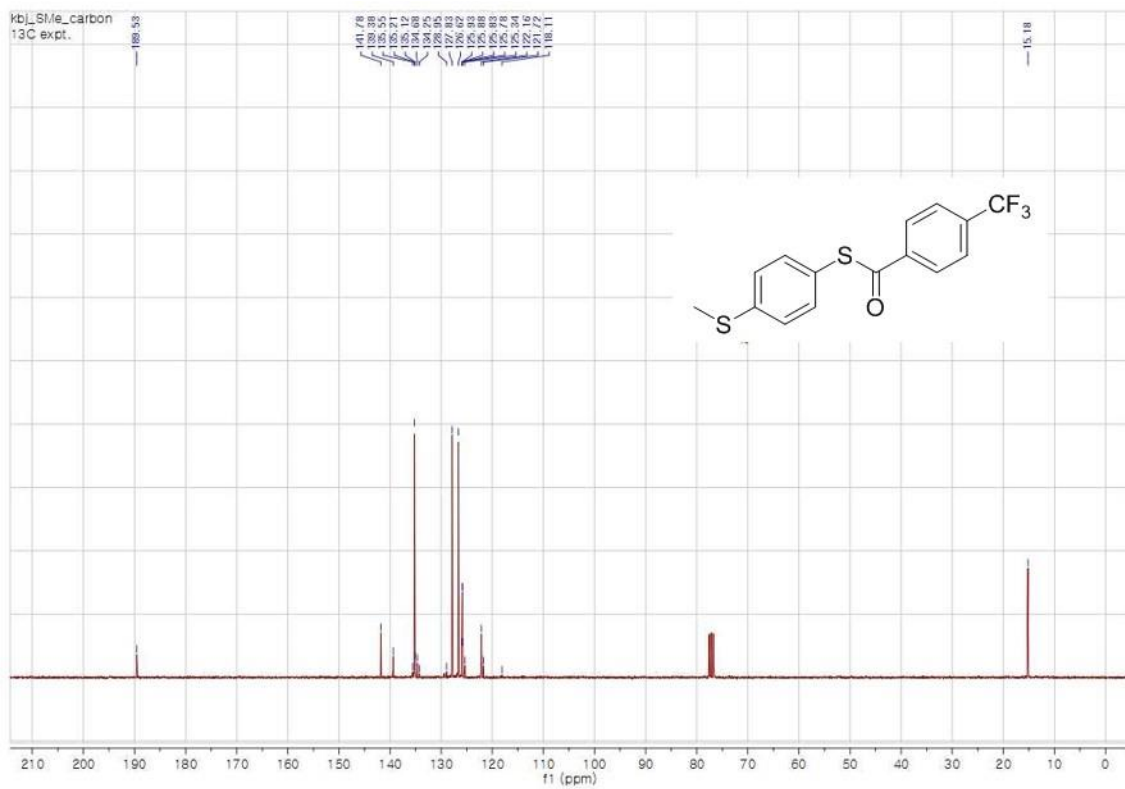

### <sup>1</sup>H NMR (1j)

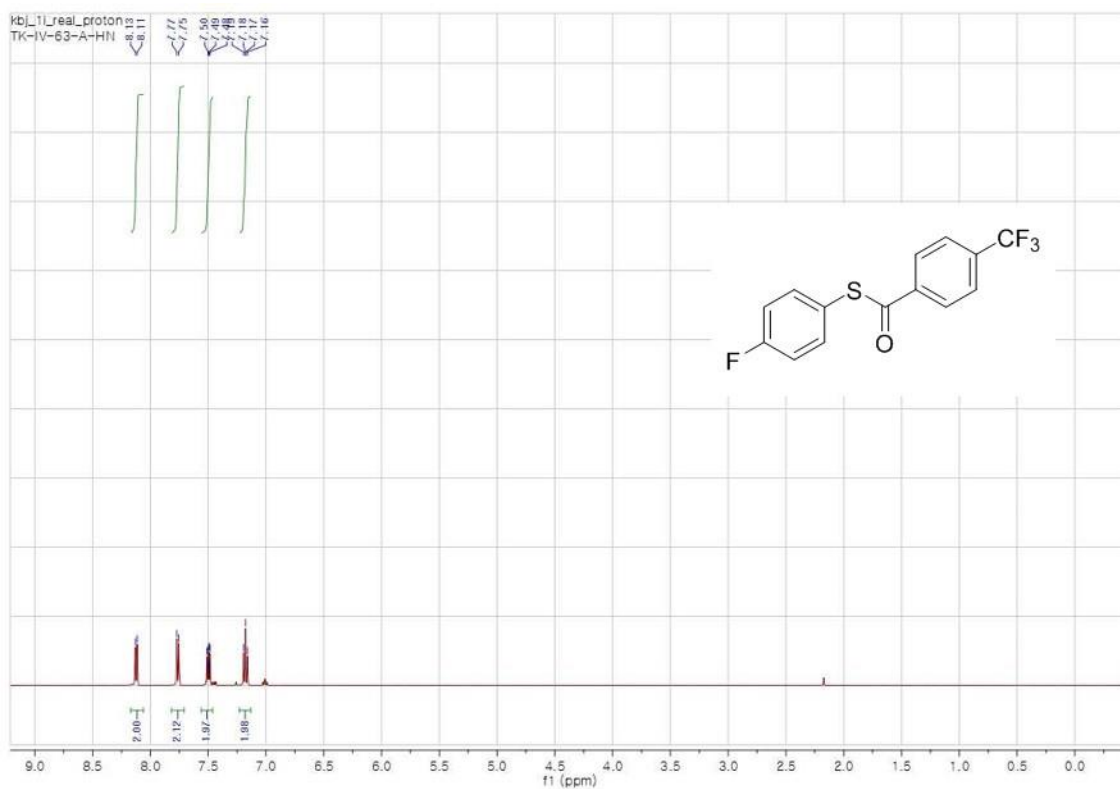

### <sup>13</sup>C NMR (1j)

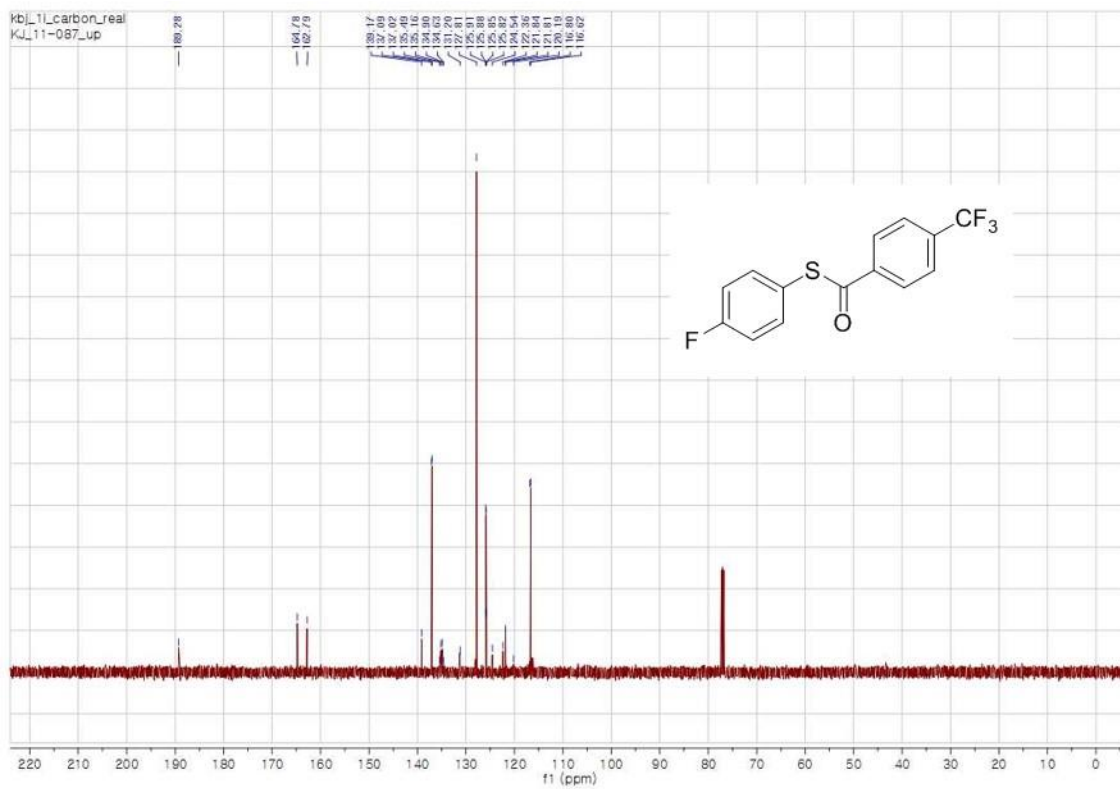

### <sup>1</sup>H NMR (1k)

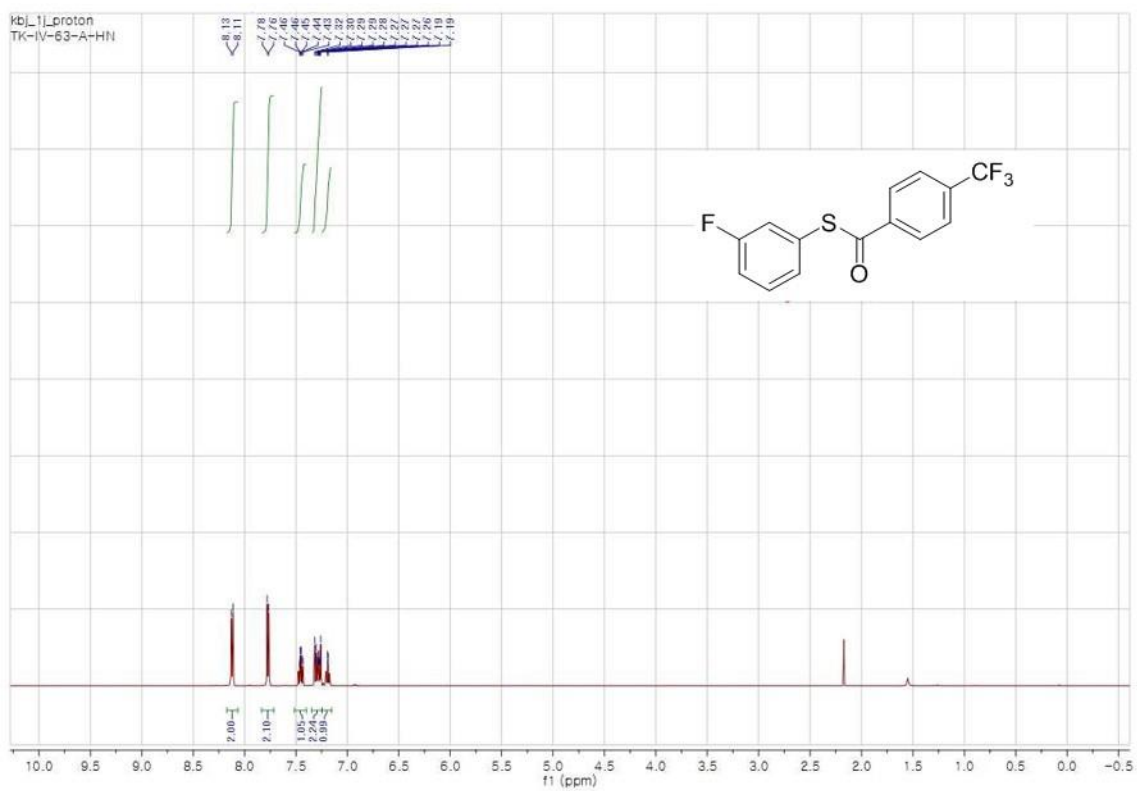

### <sup>13</sup>C NMR (1k)

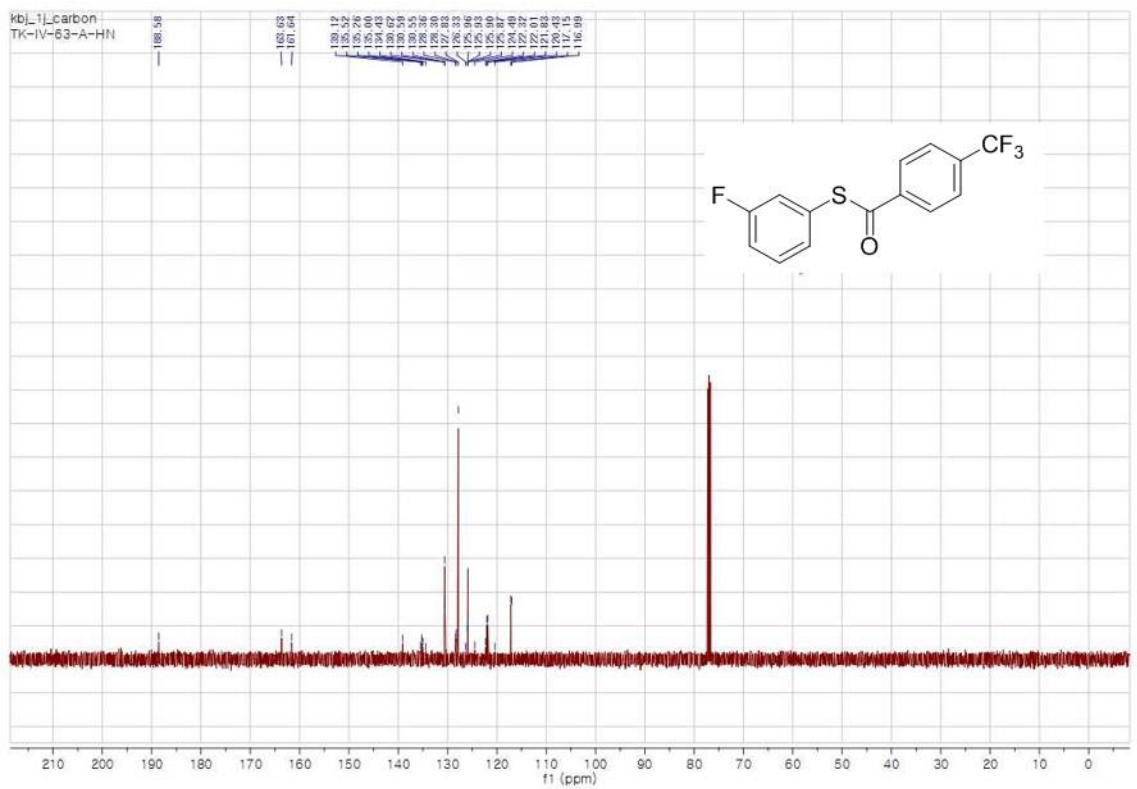

### <sup>1</sup>H NMR (1)

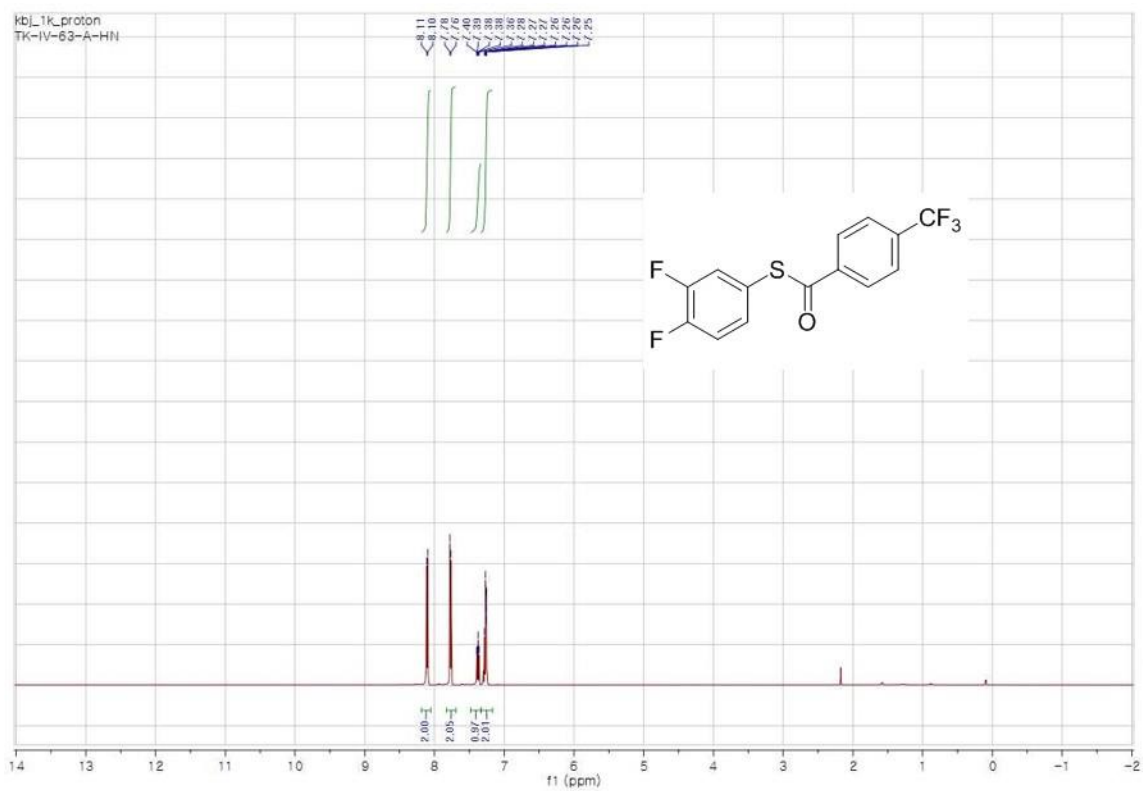

### <sup>13</sup>C NMR (1)

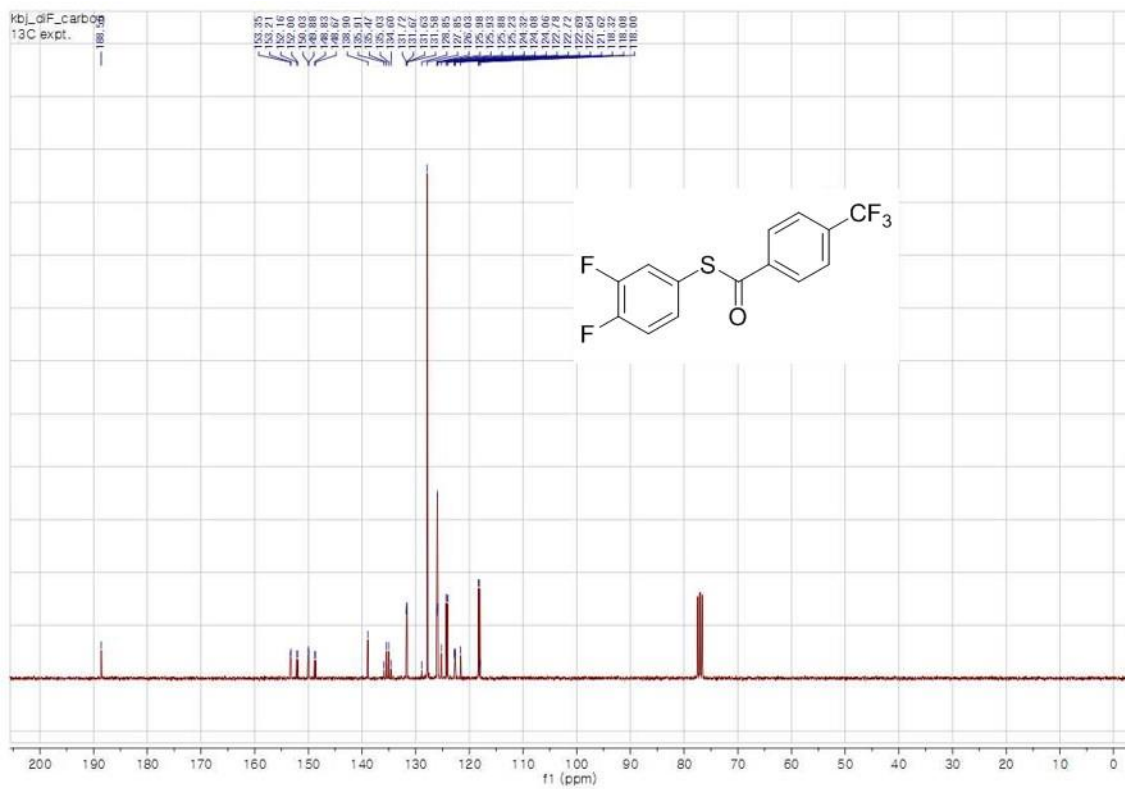

### <sup>1</sup>H NMR (1m)

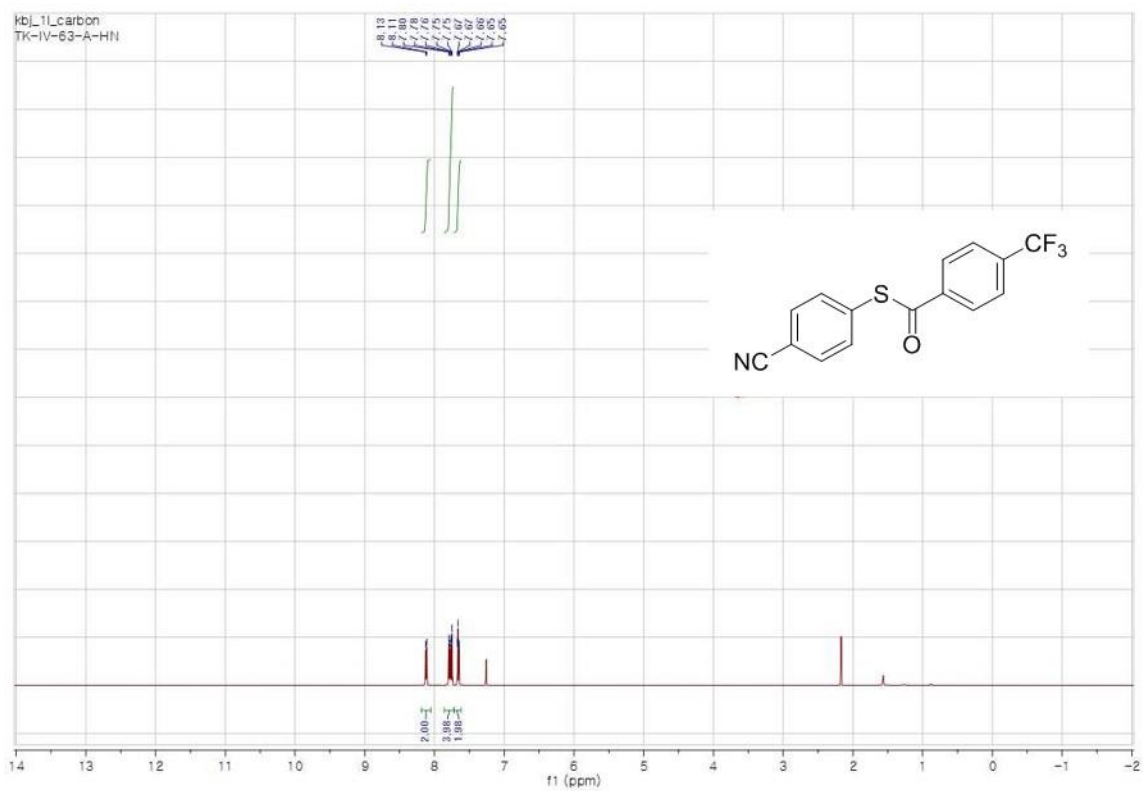

### <sup>13</sup>C NMR (1m)

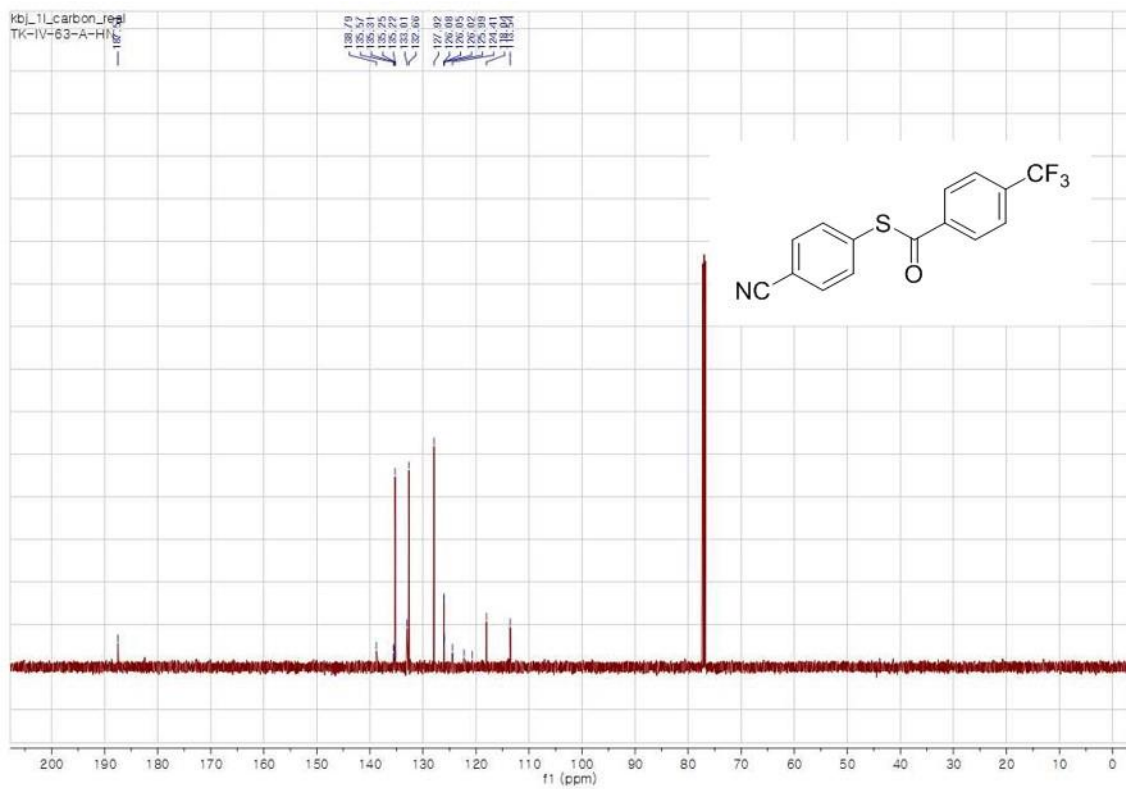

### <sup>1</sup>H NMR (1n)

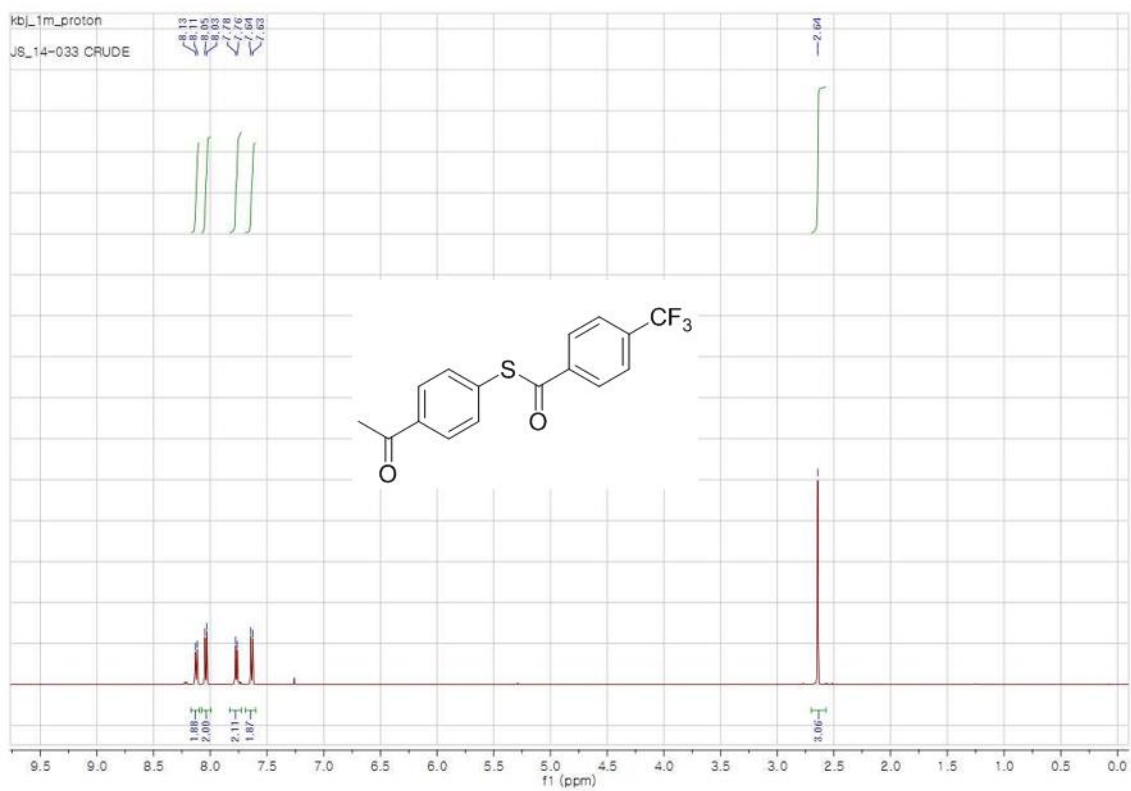

### <sup>13</sup>C NMR (1n)

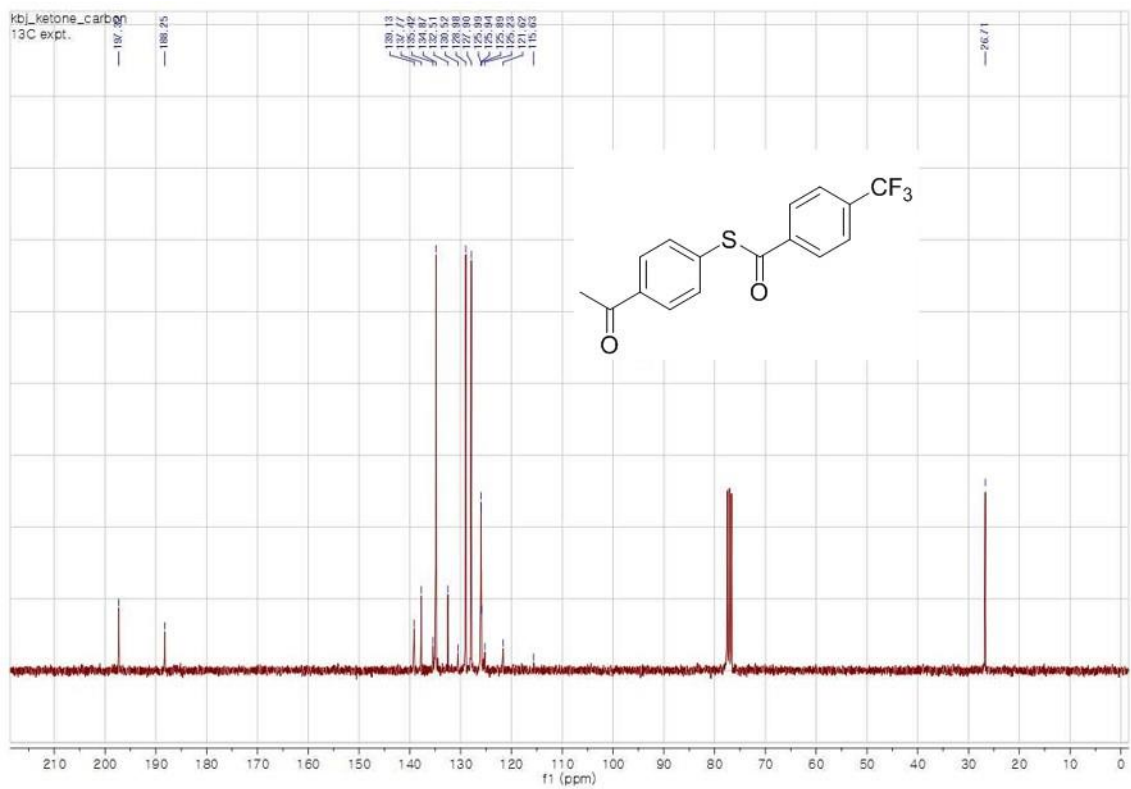

### <sup>1</sup>H NMR (1o)

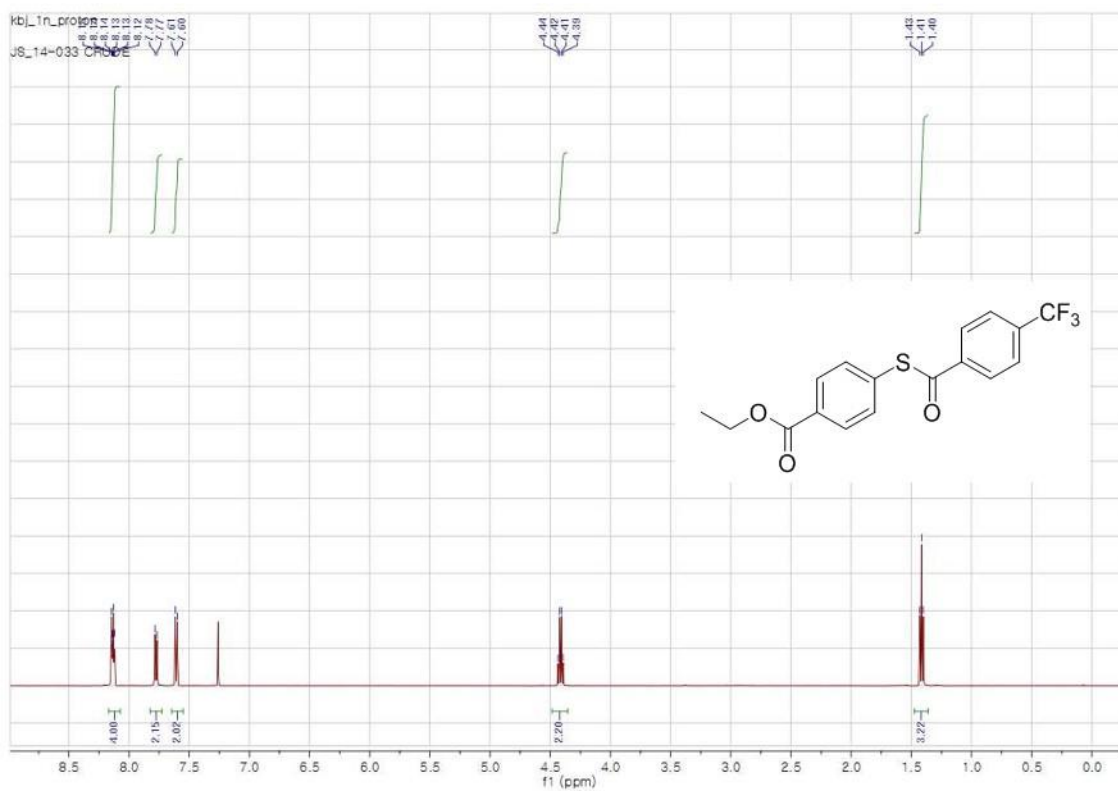

### <sup>13</sup>C NMR (1o)

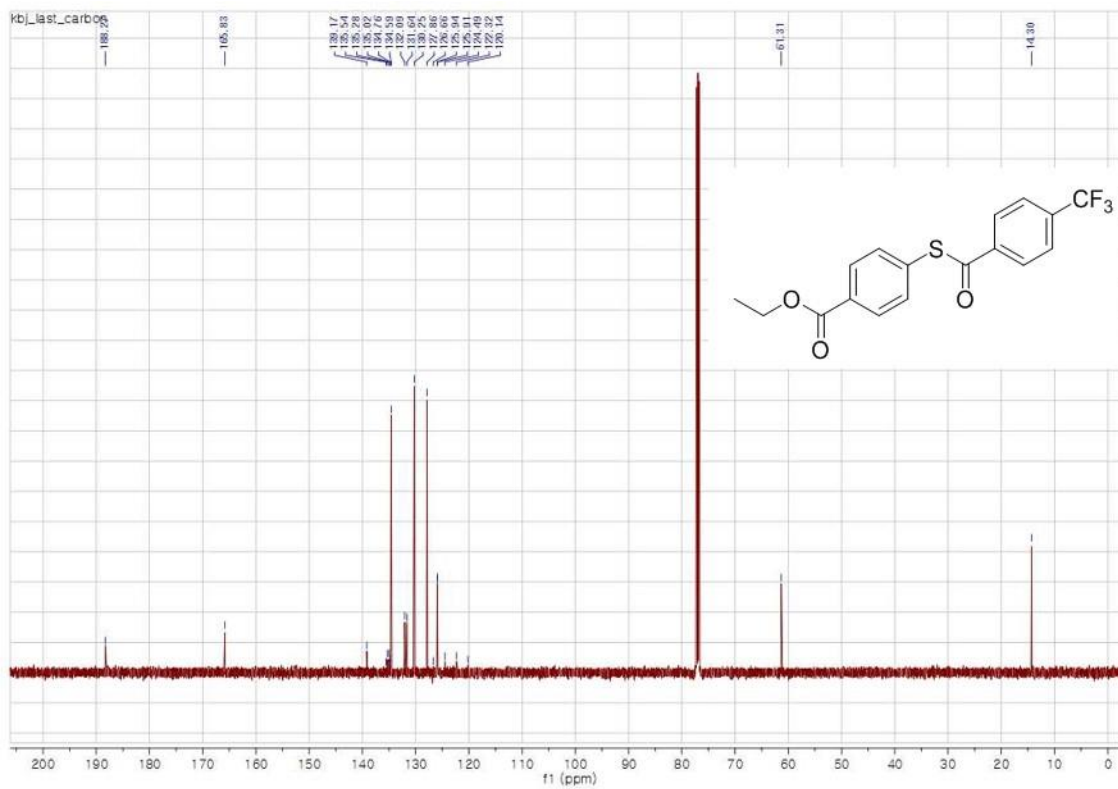

# <sup>1</sup>H NMR (1p)

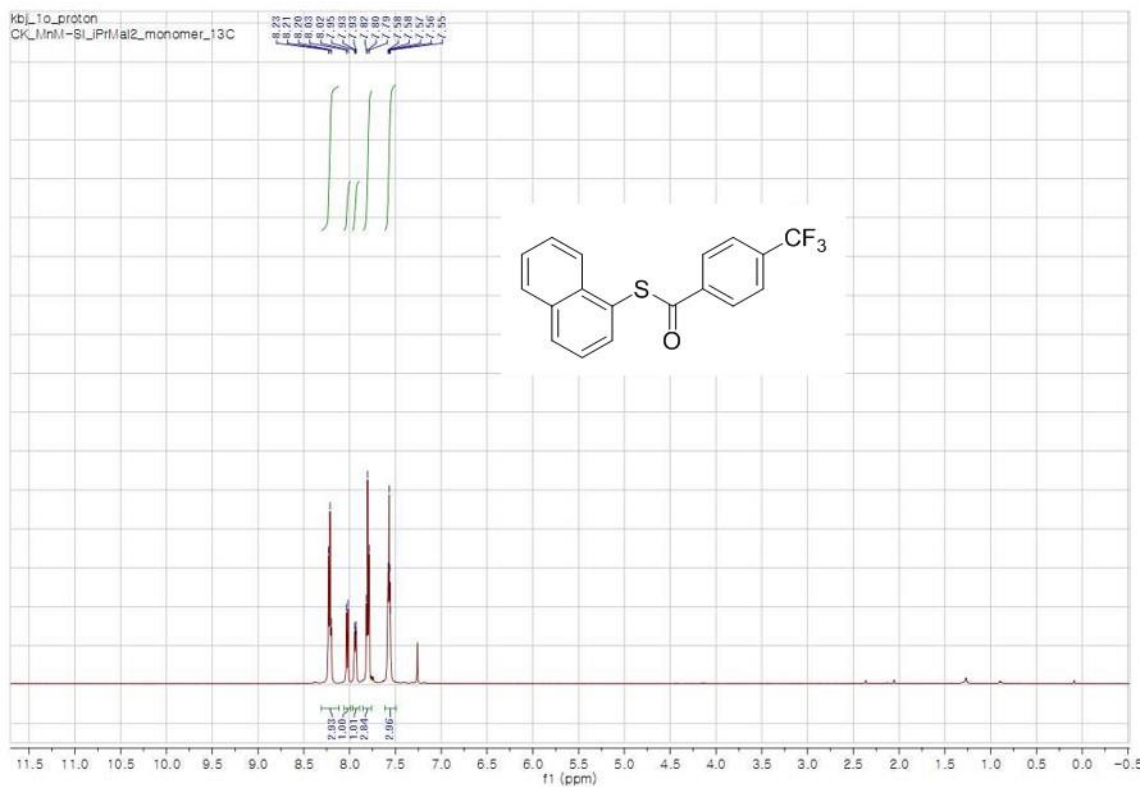

# <sup>13</sup>C NMR (1p)

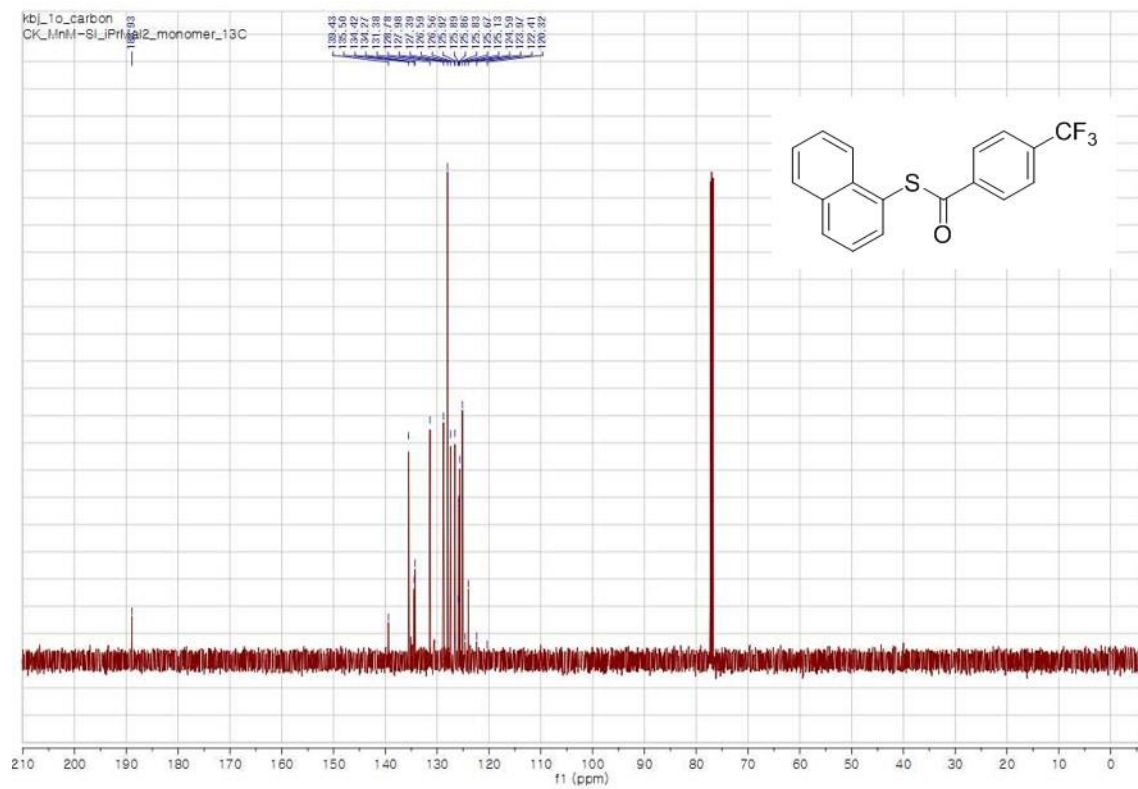



### <sup>1</sup>H NMR (1q)

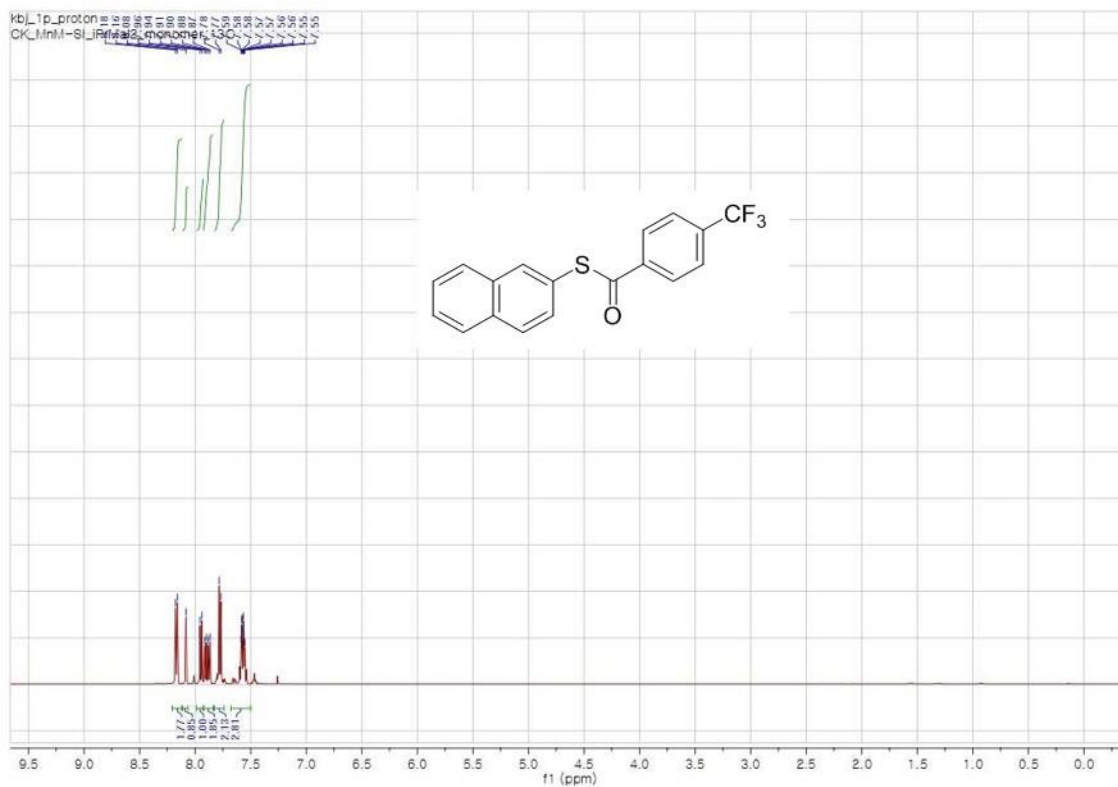

### <sup>13</sup>C NMR (1q)

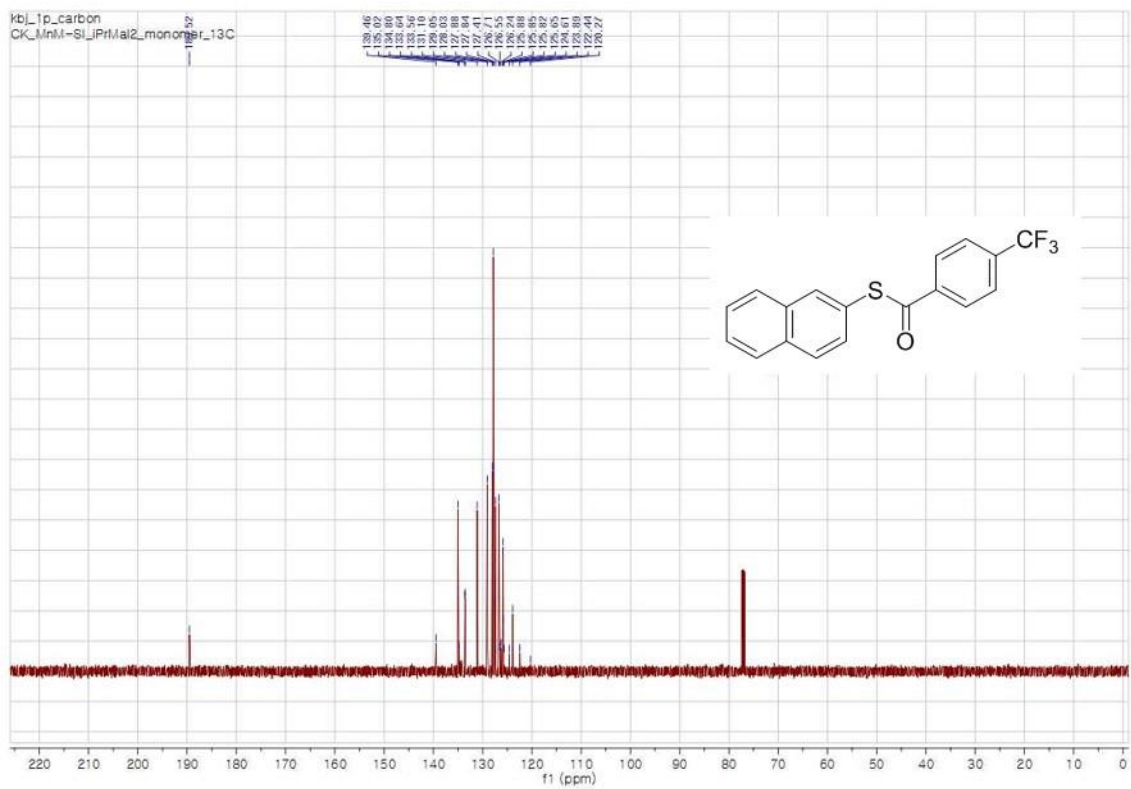

### <sup>1</sup>H NMR (1r)

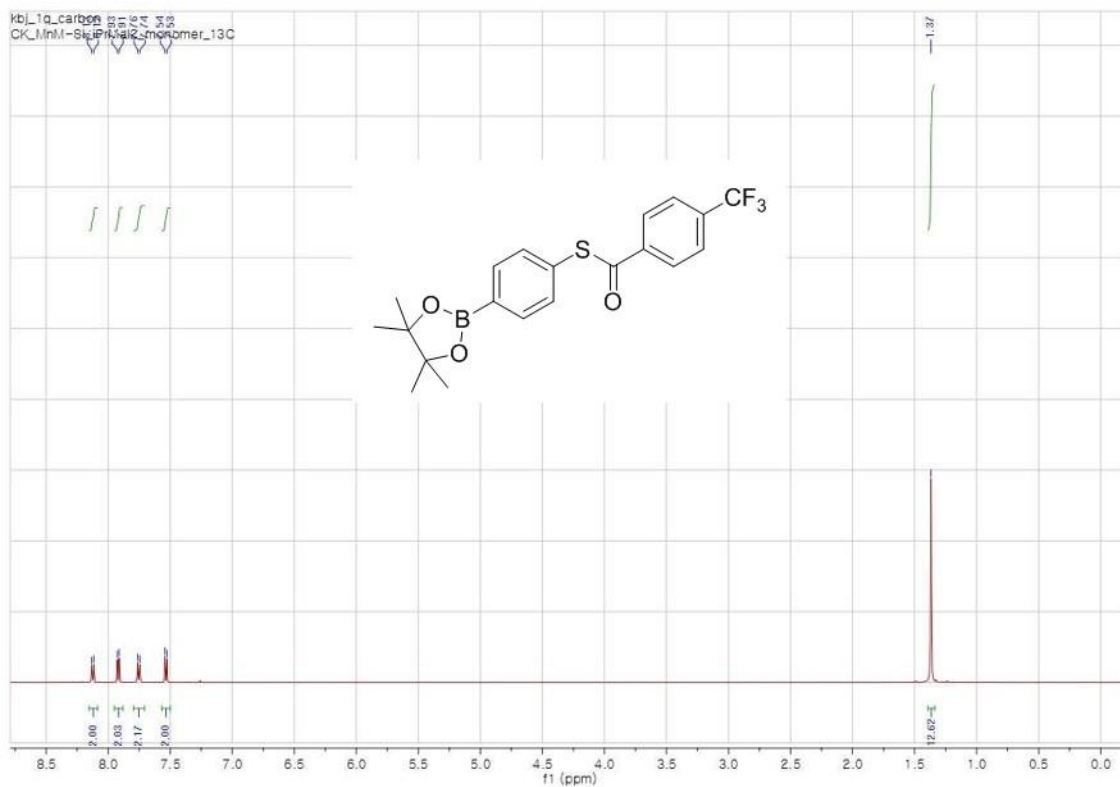

### <sup>13</sup>C NMR (1r)

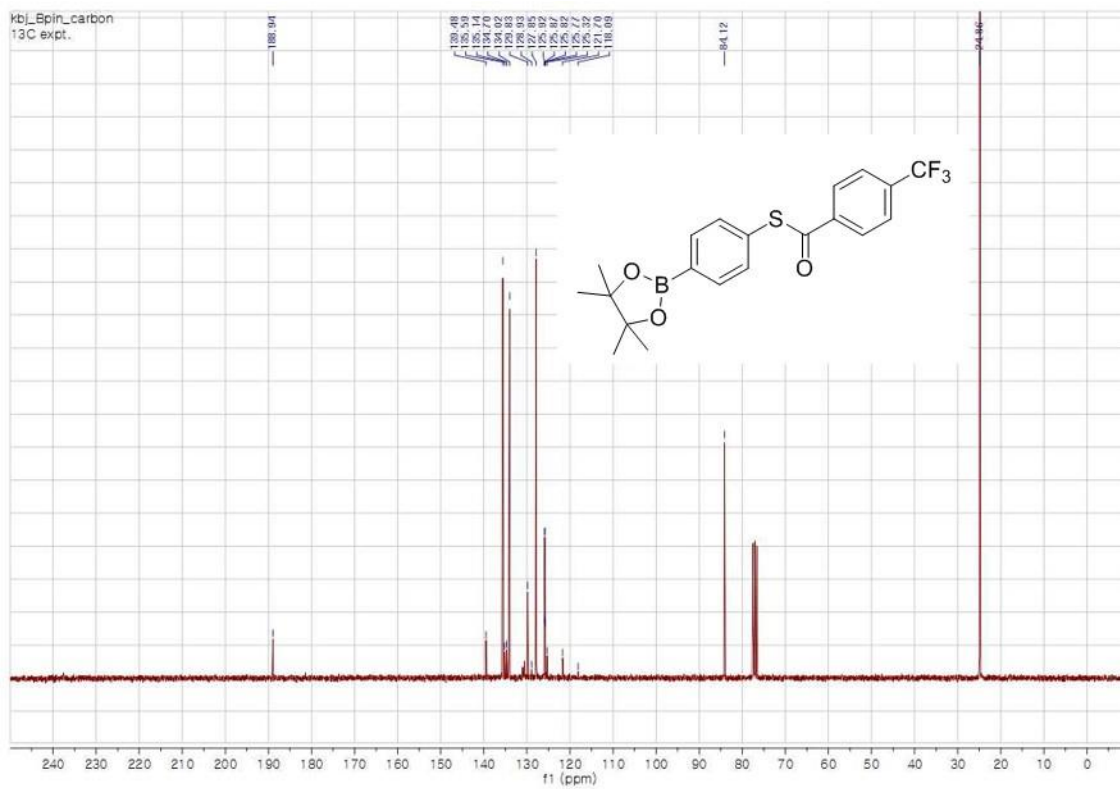

### <sup>1</sup>H NMR (1s)

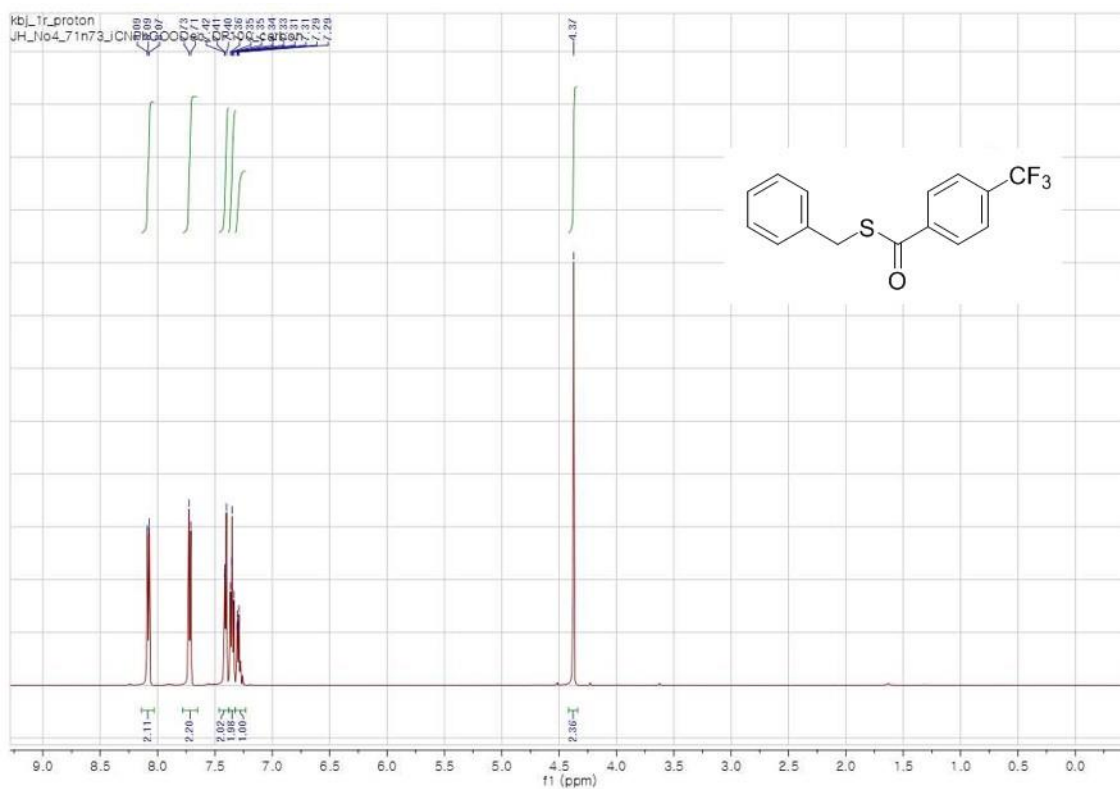

### <sup>13</sup>C NMR (1s)

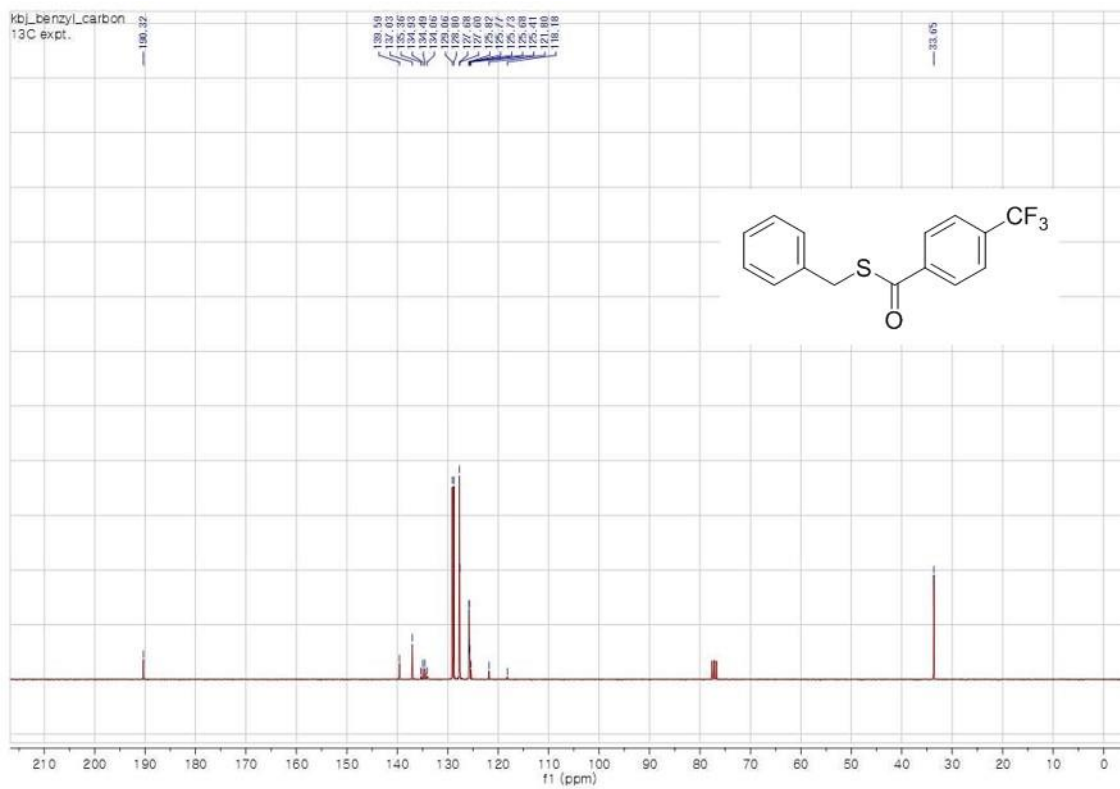

### <sup>1</sup>H NMR (1t)

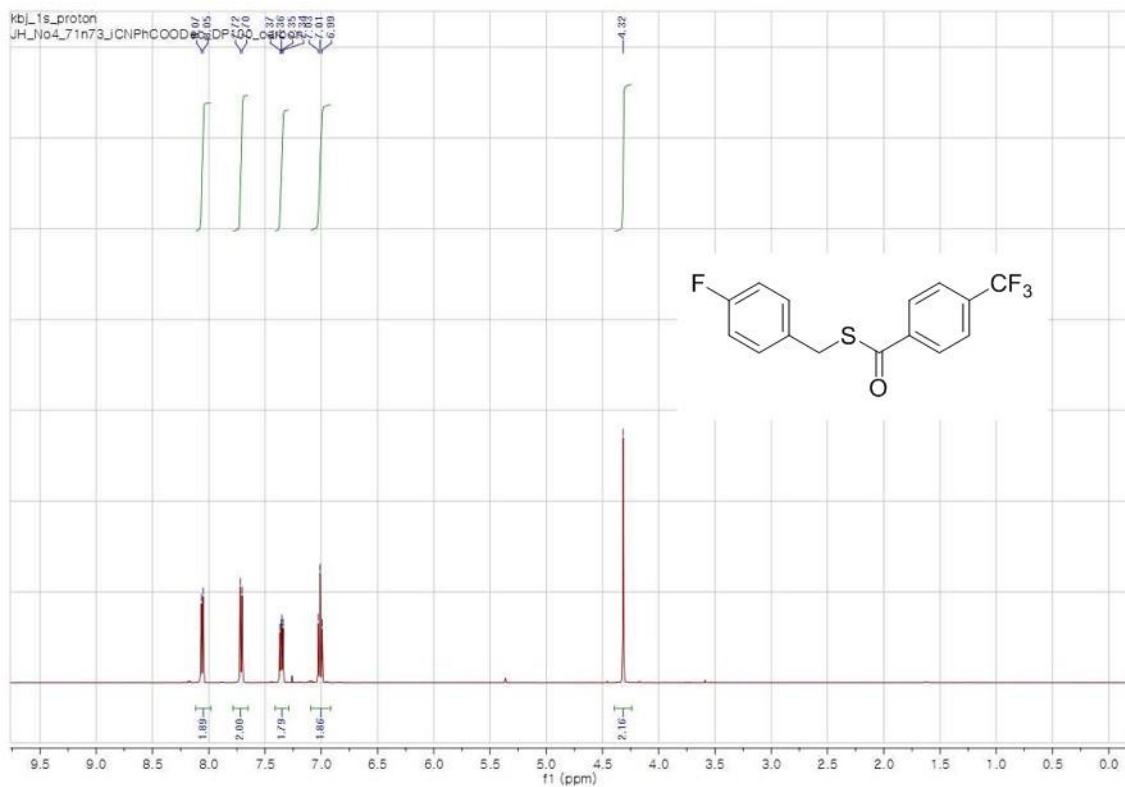

### <sup>13</sup>C NMR (1t)

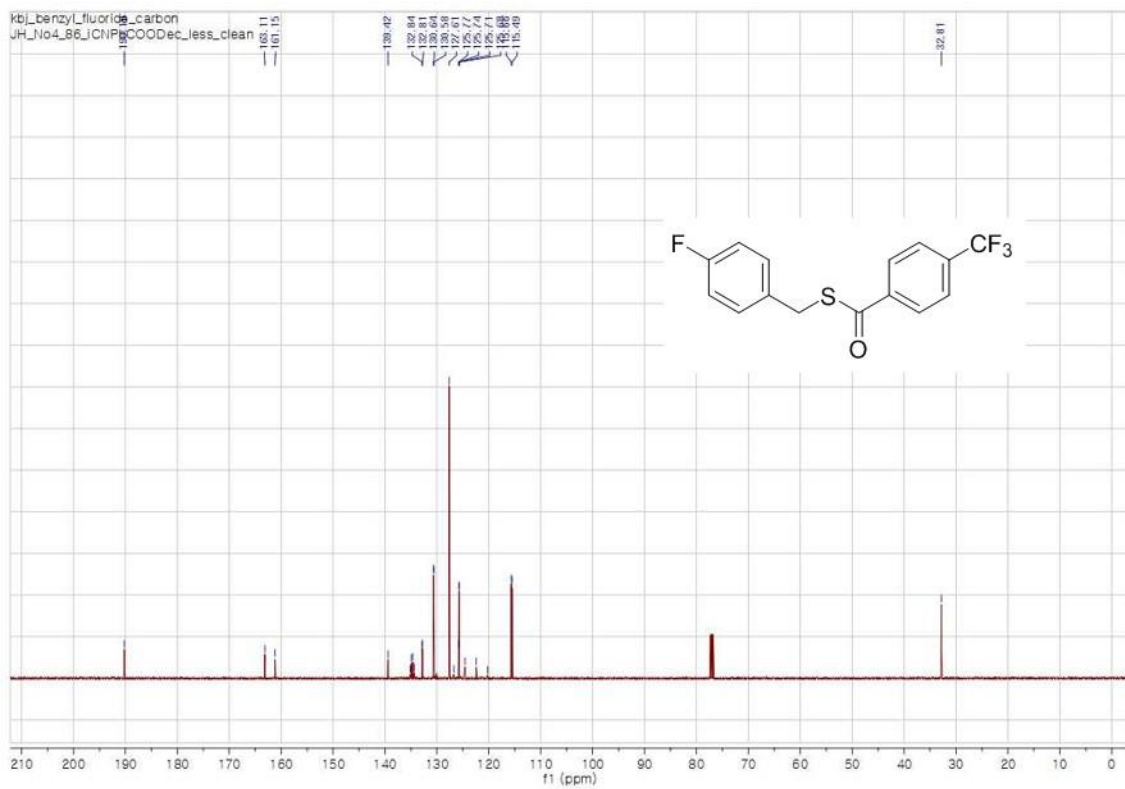

**<sup>1</sup>H NMR (4a)**

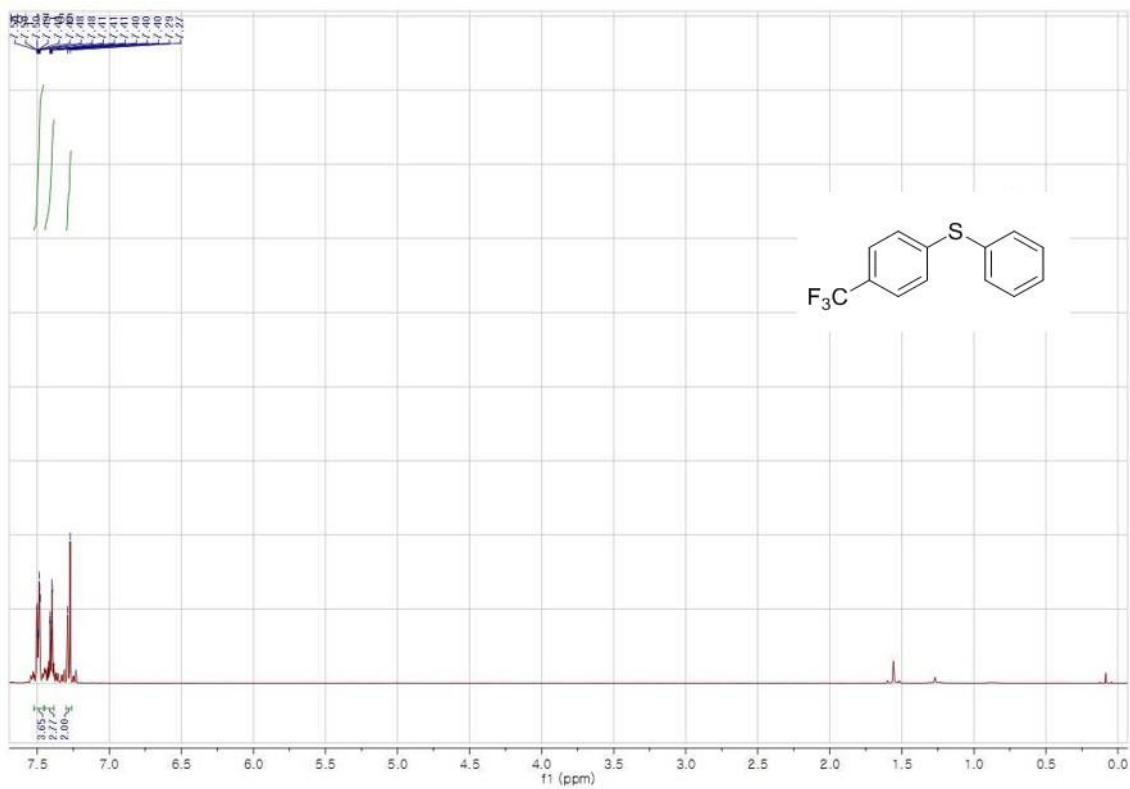

**<sup>1</sup>H NMR (5a)**

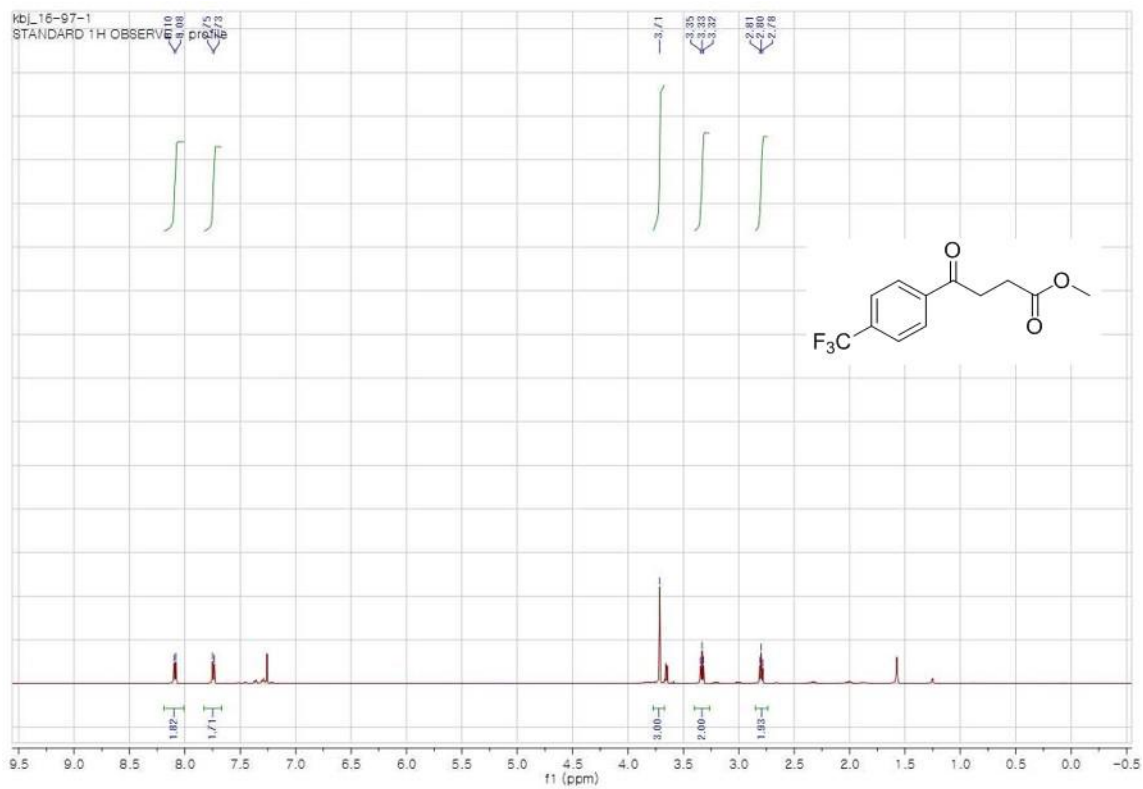

$^1\text{H}$  NMR of  $[(\text{SIPr})\text{NiCl}]_2$  (**[Ni-I]**) in  $\text{CDCl}_3$

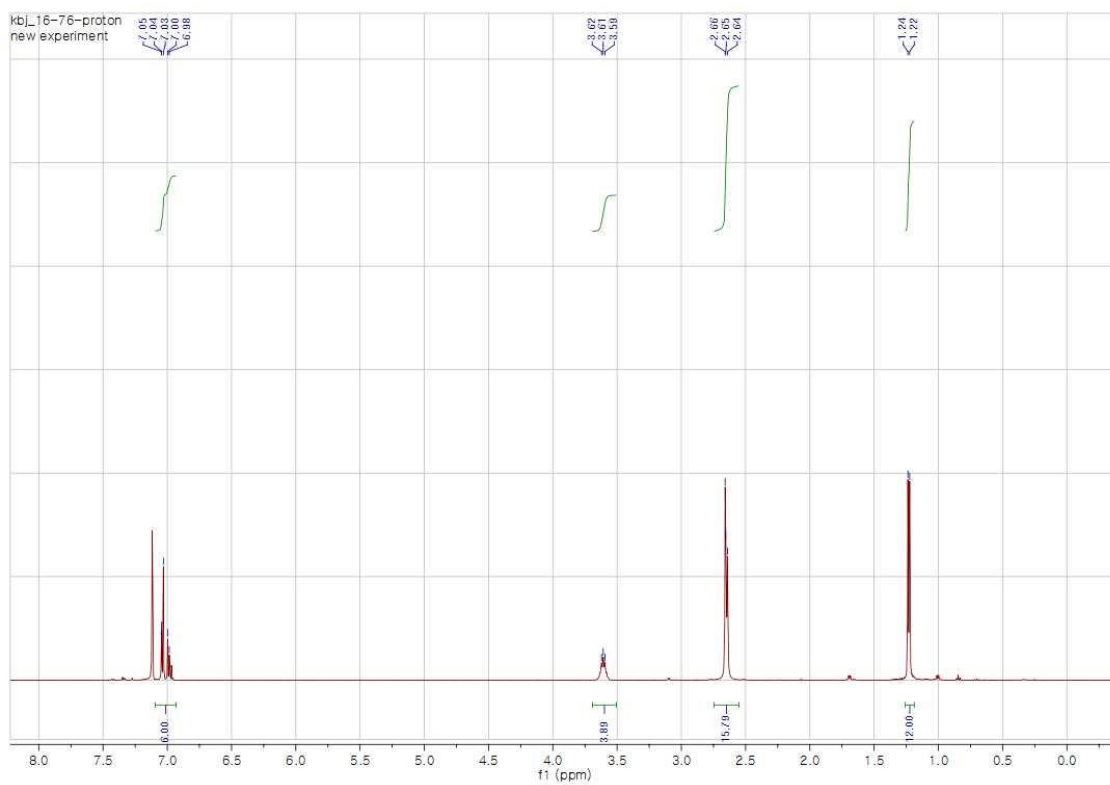

$^1\text{H}$  NMR of  $[(\text{SIPr})\text{NiCl}]_2(\mu\text{-Cl})_2$  (**[Ni-II]**) in  $\text{CD}_2\text{Cl}_2$

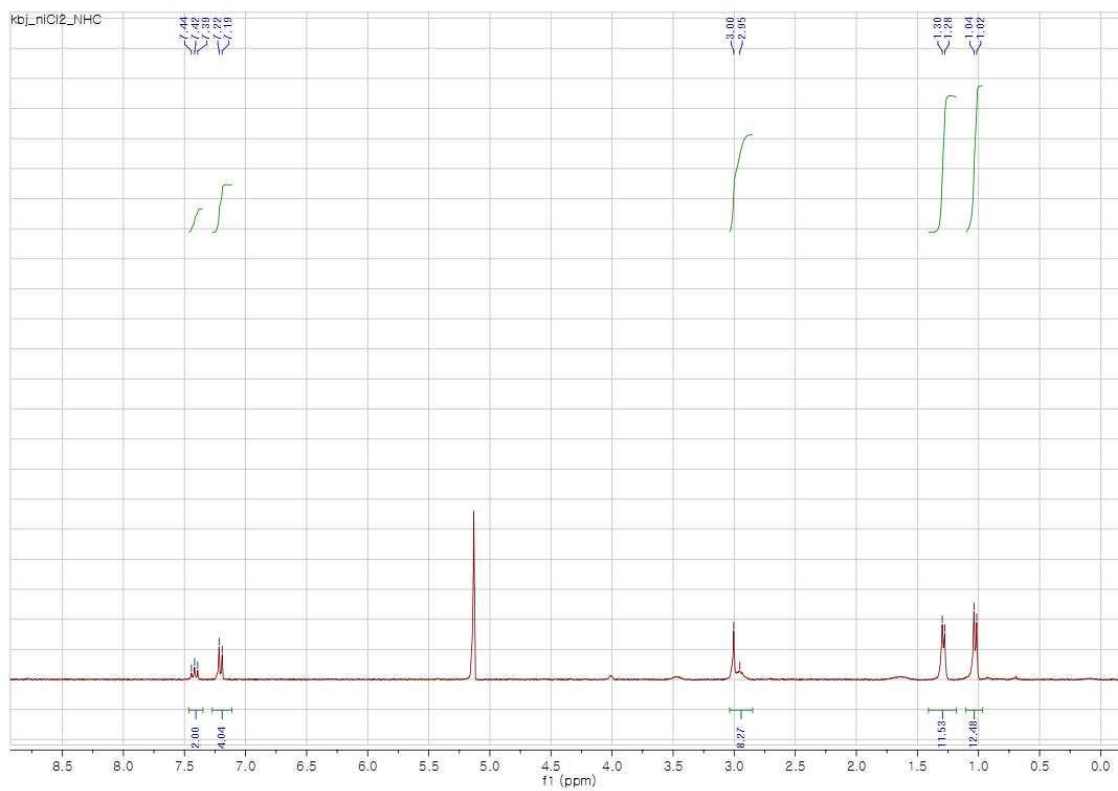

$^{13}\text{C}$  NMR of  $[(\text{SIPr})\text{NiCl}]_2(\mu\text{-Cl})_2$  (**[Ni-II]**) in  $\text{CD}_2\text{Cl}_2$

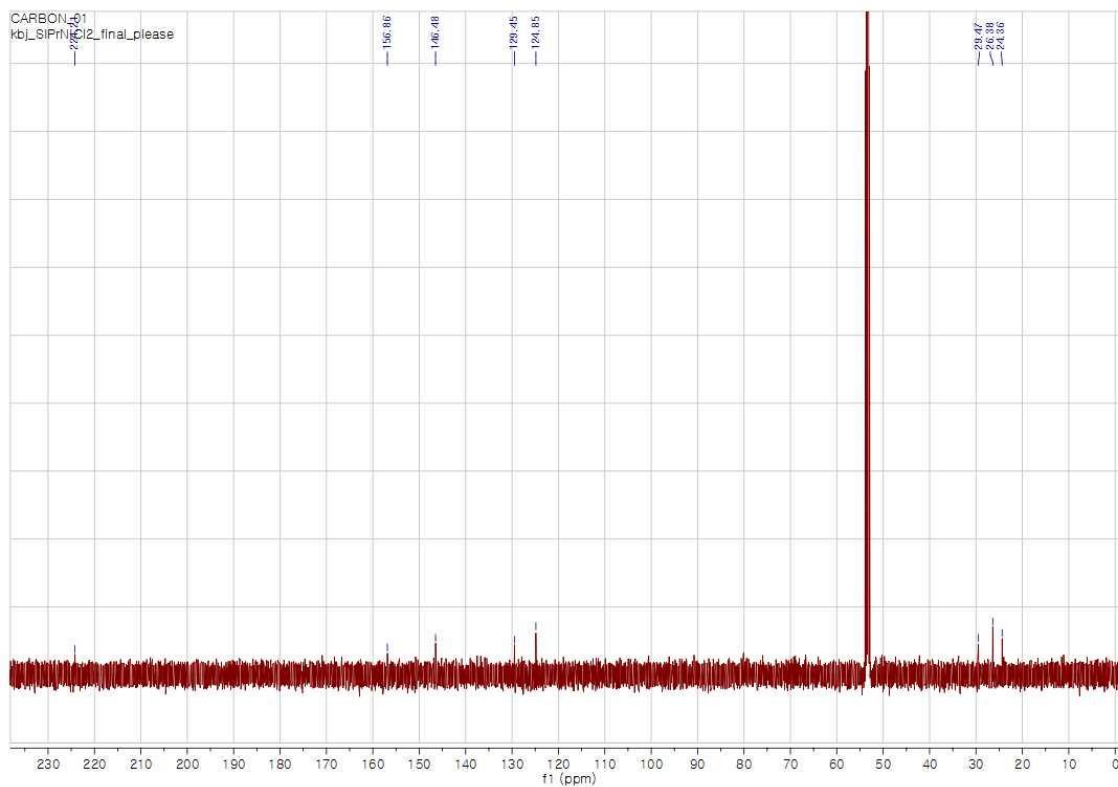

Supplement: SC-008-C7SC02516E-s001.pdf [file SC-008-C7SC02516E-s001.pdf]
